# Supplementary material for: Identification of Putative Ortholog Gene Blocks Involved in Gestant and Lactating Mammary Gland Development: A Rodent Cross-Species Microarray Transcriptomics Approach
Source: Int J Genomics. 2013 Oct 30;2013:624681. doi: 10.1155/2013/624681 (PMC3830774; doi:10.1155/2013/624681)
Supplement: Supplementary file 1 — This manuscript contains supplementary material to give a better overview of the results. In Table S1 we are describing the experimental design of heterologous microarrays hybridization; in Table S2 we showed the primers and probes for the qRT-PCR analysis for confirmation of microarray results. In S3 we are showing the list of up- and downregulated genes during pregnancy (P5, P14) and/or lactation (L1, L12) that shared spatial and temporal distributions. In S4 we described all the gene hierarchical cluster sets of altered gene transcript. In S5 is the list of altered gene transcript K-means cluster sets that correspond to potential groups of co-regulated genes. K-means clustering revealed six distinct clusters (K1-6) that distinguished up from down, early from middle, and transient from sustained changes in expression. The data from Table S6 shows the list of orthologous significant altered gene transcripts to rat and/or human in pregnancy (day 5 and 14) and lactancy (day 1 and 12). The Table S7 shows the list of families of transcription factors identified in different stage development of mammary gland. Finally in Table S8 we are describing the functional gene blocks detailed information. [file 624681.f1.zip › 624681.f1.xls]

## Sheet: Table S1
Table S1. Experimental design (microarrays).
Specie		Developmental Stage		Corresponding day within the target stage	No. of total pooled RNA samples for each hibridization	No. of arrays
Reference	Target	Reference	Target
Mus musculus (M22K_01)	Rattus norvegicus (Sprague-Dawley)	Non-pregnancy (virgin)	Pregnancy	5	3	3
				14	3	3
			Lactation	1	3	3
				12	3	3
