# Supplementary material for: Identification of Putative Ortholog Gene Blocks Involved in Gestant and Lactating Mammary Gland Development: A Rodent Cross-Species Microarray Transcriptomics Approach
Source: Int J Genomics. 2013 Oct 30;2013:624681. doi: 10.1155/2013/624681 (PMC3830774; doi:10.1155/2013/624681)
Supplement: Supplementary file 1 — This manuscript contains supplementary material to give a better overview of the results. In Table S1 we are describing the experimental design of heterologous microarrays hybridization; in Table S2 we showed the primers and probes for the qRT-PCR analysis for confirmation of microarray results. In S3 we are showing the list of up- and downregulated genes during pregnancy (P5, P14) and/or lactation (L1, L12) that shared spatial and temporal distributions. In S4 we described all the gene hierarchical cluster sets of altered gene transcript. In S5 is the list of altered gene transcript K-means cluster sets that correspond to potential groups of co-regulated genes. K-means clustering revealed six distinct clusters (K1-6) that distinguished up from down, early from middle, and transient from sustained changes in expression. The data from Table S6 shows the list of orthologous significant altered gene transcripts to rat and/or human in pregnancy (day 5 and 14) and lactancy (day 1 and 12). The Table S7 shows the list of families of transcription factors identified in different stage development of mammary gland. Finally in Table S8 we are describing the functional gene blocks detailed information. [file 624681.f1.zip › 624681.f2.xls]

## Sheet: Table S2
Table S2. Primers and probes for the qRT-PCR.
Number	Gene				Cluster membership	Amplicon size (pb)	Tm (°C)	Sequence (5' > 3')		Probe UPL
	NCBI ID (Mm)	NCBI ID (Rn)	Official Symbol	Name				Foward oligonucleotide	Reverse oligonucleotide
1	NM_008084	NM_017008	Gapdh	glyceraldehyde-3-phosphate dehydrogenase	none (control)	92	58-60	ctgcaccaccaactgcttag	tgatggcatggactgtgg	Gapdh
2	NM_007393	NM_031144	Actb	actin, beta		70	58-60	aggcccctctgaacccta	ggggtgttgaaggtctcaaa	Actb
4	NM_007475	NM_022402	Rlp0 / Arbp	Ribosomal protein, large, P0 / Acidic ribosomal phosphoprotein P0		91	58-60	gatgcccagggaagacag	cacaatgaagcattttgggtag	85
5	AK018176	NM_001109552	Sfrs1	Splicing factor, arginine/serine-rich 1 (ASF/SF2)		71	58-60	tgcagctggcaagatctaaa	cccttgtgagcatctgcat	2
6	NM_013556	NM_012583	Hprt1	Hypoxanthine guanine phosphoribosyl transferase 1		126	58-60	ggtccattcctatgactgtagatttt	caatcaagacgttctttccagtt	22
8	NM_008610	NM_031054	Mmp2	matrix metallopeptidase 2	K1	86	58-60	ctccactacgcttttctcgaat	tgggtatccatctccatgct	60
10	AF053956	NM_053470	Runx2	runt related transcription factor 2			58-60			77
11	X06746	NM_053633	Egr2	early growth response 2			58-60			60
12	NM_007784	NM_138874	Csn1s1	casein alpha s1	K2	76	58-60	ggaactccacagttataccacttgat	aggatggacggagagacataaa	58
14	NM_011488	NM_017064	Stat5a	signal transducer and activator of transcription 5A		88	58-60	ctacaacatgtacccaccgaac	atgcctggcaacatccat	85
15	AJ272163	NM_012689	Esr1	estrogen receptor alpha	K3	88	58-60	tgctcctaacttgctcttgga	acttgacgtagccagcaaca	22
16	AK003042	NM_012996	Oxt	oxytocin		81	58-60	cgcctgctacatccagaact	ccgcagggaagacacttg	85
19	NM_011648	NM_012888	Tshr	thyroid stimulating hormone receptor			58-60			25
21	X03766	NM_019212	Acta1	actin, alpha 1, skeletal muscle	K4	73	58-60	tgaagcctcacttcctaccc	cgtcacacatggtgtctagtttc	81
22	AF119148	XM_342653	Flnc	filamin C, gamma		71	58-60	ggcaagggagatttgaagc	ttggggatcaccttgatgtc	46
23	AF254422	XM_575941	Pax7	paired box gene 7		60	58-60	gcacagaggaccaagctca	cgcacgacggttactgaac	85
25	AF081116	XM_228551	Taf1	TAF1 RNA polymerase II, TATA box binding protein (TBP)-associated factor	K5	68	58-60	tttccagatgaagattgatgatg	cagcaatgaaagcccttgtag	68
26	NM_010577	NM_001108118	Itga5	integrin alpha 5 (fibronectin receptor alpha)		86	58-60	atcatcctcgccatcctttt	agggagcgtttgaagaagc	15
27	BC012520	NM_133531	Pank4	pantothenate kinase 4		77	58-60	tgaggaggctctggatgg	ctgccctctcagctgcat	20
