# Supplementary material for: Identification of Putative Ortholog Gene Blocks Involved in Gestant and Lactating Mammary Gland Development: A Rodent Cross-Species Microarray Transcriptomics Approach
Source: Int J Genomics. 2013 Oct 30;2013:624681. doi: 10.1155/2013/624681 (PMC3830774; doi:10.1155/2013/624681)
Supplement: Supplementary file 1 — This manuscript contains supplementary material to give a better overview of the results. In Table S1 we are describing the experimental design of heterologous microarrays hybridization; in Table S2 we showed the primers and probes for the qRT-PCR analysis for confirmation of microarray results. In S3 we are showing the list of up- and downregulated genes during pregnancy (P5, P14) and/or lactation (L1, L12) that shared spatial and temporal distributions. In S4 we described all the gene hierarchical cluster sets of altered gene transcript. In S5 is the list of altered gene transcript K-means cluster sets that correspond to potential groups of co-regulated genes. K-means clustering revealed six distinct clusters (K1-6) that distinguished up from down, early from middle, and transient from sustained changes in expression. The data from Table S6 shows the list of orthologous significant altered gene transcripts to rat and/or human in pregnancy (day 5 and 14) and lactancy (day 1 and 12). The Table S7 shows the list of families of transcription factors identified in different stage development of mammary gland. Finally in Table S8 we are describing the functional gene blocks detailed information. [file 624681.f1.zip › 624681.f3.xls]

## Sheet: Table S3-A
Table S3-A. Significant altered gene transcripts in pregnancy (day 5 and 14) and lactancy (day 1 and 12)
Down-regulated (z-score > -1.49)
Number	Flag		Gene		Developmental Stage (mean z-score)
			NCBI ID	Official Symbol	P5	P14	L1	L12
1	a	D	AF156987	Cry2	-2.91447	-3.54692	-3.46858	-2.97656
2	a	D	AJ409493	N/A	-2.15057	-1.5961	-1.69136	-1.85358
3	a	D	AK006198	1700021F02Rik	-2.26228	-1.75193	-1.7618	-2.69019
4	a	D	AK011632	2610030H06Rik	-2.2359	-2.05321	-2.52731	-2.74442
5	a	D	AK013287	Nat13	-1.6973	-1.48972	-2.15212	-2.07448
6	a	D	AK013512	Lrrc47	-1.70974	-1.71944	-2.49029	-3.89623
7	a	D	AK014239	3110067G11Rik	-1.72919	-2.26057	-2.19959	-2.46333
8	a	D	AK015953	4930533D04Rik	-1.99894	-1.72489	-2.18041	-2.17481
9	a	D	AK018323	Med12l	-1.72009	-2.12755	-2.21248	-1.89734
10	a	D	AK020201	8030444G23Rik	-2.35164	-1.52745	-2.11218	-2.26255
11	a	D	BC005527	Enpp3	-2.01007	-1.54462	-2.28808	-2.16362
12	a	D	BC008158	Ifi35	-1.50722	-1.64065	-1.86935	-1.71602
13	a	D	D30730	Nf1	-2.14785	-1.68993	-2.26484	-1.97121
14	a	D	NM_008465	Kpna1	-1.99643	-1.52811	-1.71559	-2.43302
15	a	D	NM_008732	Slc11a2	-1.90461	-1.55633	-1.87444	-2.26637
16	a	D	NM_010045	Darc	-1.78812	-1.83513	-1.76581	-2.77564
17	a	D	NM_010133	En1	-1.82165	-1.70988	-2.34897	-3.46173
18	a	D	NM_011136	Pou2af1	-1.99565	-1.63589	-1.96805	-2.28014
19	a	D	NM_013838	Trpc6	-1.56027	-1.54515	-2.12154	-2.18937
20	a	D	S76791	Nfasc	-1.50087	-2.02306	-1.97483	-2.08059
21	a	D	U34828	Rny1	-1.84507	-2.7395	-3.52304	-3.74778
22	a	D	X96705	Def6	-1.58091	-2.03763	-1.93759	-1.85807
Up-regulated (z-score > 1.49)
Number	Flag		Gene		Developmental Stage (mean z-score)
			NCBI ID	Official Symbol	P5	P14	L1	L12
1	a	U	AB030201	Tmem205	2.75691	2.43701	1.85001	1.65278
2	a	U	AF023243	N/A	2.05925	2.69731	2.64049	2.23169
3	a	U	AF041944	N/A	1.8284	1.73343	1.58651	1.92731
4	a	U	AF041973	N/A	1.93145	2.40241	1.76981	2.15904
5	a	U	AF050425	N/A	1.55848	1.87435	1.94366	1.6824
6	a	U	AF068182	Blnk	1.7912	2.7898	2.369	1.67035
7	a	U	AF073933	N/A	1.7981	2.17504	2.22133	1.87189
8	a	U	AF093560	N/A	1.9995	2.47218	2.56372	2.08977
9	a	U	AF263365	Rab3d	1.63256	1.97063	1.55726	1.5611
10	a	U	AF276872	Slc5a7	2.38568	1.92958	1.71033	2.01946
11	a	U	AJ007954	N/A	1.85094	1.89407	1.73174	1.51038
12	a	U	AK003325	1110002N22Rik	1.75311	3.09497	3.21258	3.09794
13	a	U	AK003404	Fbxl22	2.47719	2.76143	2.29518	2.49447
14	a	U	AK003649	Agpat5	2.68412	2.07126	1.94895	1.73823
15	a	U	AK004982	Klhl5	2.66263	2.36276	2.27032	1.86183
16	a	U	AK005119	1500002J14Rik	2.30775	2.03337	1.76883	1.87179
17	a	U	AK005727	1700007J24Rik	2.2608	1.79519	1.75056	1.56545
18	a	U	AK006745	1700049J03Rik	2.16384	3.57288	2.89113	2.54976
19	a	U	AK006929	Cldnd2	2.36036	2.98801	2.42186	2.31235
20	a	U	AK007391	Ubr4	1.77309	1.81575	2.1634	2.33819
21	a	U	AK007903	1810059C17Rik	2.72851	2.05052	2.21915	1.90069
22	a	U	AK011937	2610209M04Rik	2.0557	2.61034	2.24115	1.57545
23	a	U	AK013809	2900082C11Rik	2.95999	2.35866	1.83874	1.64828
24	a	U	AK014261	3110079O15Rik	1.49152	2.37663	2.86775	3.02688
25	a	U	AK014386	Akap5	2.42274	2.69281	2.89786	1.9472
26	a	U	AK014665	Ppih	1.62538	1.72895	2.16299	2.05914
27	a	U	AK014901	4921515L22Rik	2.09723	2.57054	2.3856	2.37607
28	a	U	AK015610	4930482G09Rik	2.55317	2.24227	2.24035	1.61032
29	a	U	AK015837	4930519B02Rik	1.71592	2.5266	2.63317	1.5967
30	a	U	AK015855	4930520O04Rik	2.26302	2.56523	2.11806	2.00022
31	a	U	AK016169	4930558C23Rik	2.49614	2.89683	2.62573	2.21696
32	a	U	AK016817	Gpr39	3.11456	3.81602	2.98973	2.39862
33	a	U	AK017152	Slain2	2.32408	2.76832	2.56105	1.87634
34	a	U	AK017966	5830433G22Rik	1.94319	1.63733	1.88076	1.51586
35	a	U	AK019807	Tmem190	1.74428	2.31706	2.15885	2.07569
36	a	U	AK020389	Tmhs	1.85006	1.85675	1.93935	1.77972
37	a	U	AK020709	A230103L15Rik	1.64186	2.78099	3.22009	3.04388
38	a	U	AK020940	A930037H05Rik	2.91767	3.24389	2.71297	2.48225
39	a	U	AK021034	B830042I05Rik	2.16355	2.67995	2.63899	2.89343
40	a	U	AK021366	E130102B10Rik	2.3862	2.00797	2.0807	1.67267
41	a	U	BC003984	Triobp	1.75188	1.69113	2.09647	1.83802
42	a	U	BC004009	Farp1	3.03956	3.29592	2.63798	2.58879
43	a	U	BC006661	Dbr1	1.82926	2.2479	2.491	1.91455
44	a	U	BC006835	Gigyf2	-1.56186	3.2345	4.11247	3.91284
45	a	U	BC012520	Pank4	2.65153	2.30702	2.57959	2.11953
46	a	U	L17334	Ggt1	1.96156	2.38516	2.17975	1.86151
47	a	U	L37414	N/A	2.24119	2.37359	3.27458	2.38131
48	a	U	NM_007512	Atpif1	2.32028	2.13527	2.10675	1.94261
49	a	U	NM_007614	Ctnnb1	1.60998	1.9533	1.87174	1.77816
50	a	U	NM_007763	Crip1	2.14223	1.9805	2.00902	1.58304
51	a	U	NM_007784	Csn1s1	-1.7106	2.82667	4.09255	4.19375
52	a	U	NM_007949	Ercc2	2.11755	2.15348	1.75853	1.60067
53	a	U	NM_008107	Gdf1	2.17964	1.57106	1.7053	1.73693
54	a	U	NM_008374	Il9r	2.81288	2.40936	2.01436	1.5711
55	a	U	NM_008423	Kcnd1	3.2214	1.95583	1.75877	1.69927
56	a	U	NM_008713	Nos3	1.62563	2.22891	1.7173	1.87943
57	a	U	NM_008796	Pctp	2.50648	1.6587	1.55775	1.81808
58	a	U	NM_009154	Sema5a	1.90561	2.42335	1.6202	2.27863
59	a	U	NM_009329	Zfp354a	2.12366	2.58155	3.28994	2.5417
60	a	U	NM_009344	Phlda1	1.55606	1.71898	1.86476	1.94473
61	a	U	NM_009788	Calb1	1.69075	2.40382	2.46102	1.77423
62	a	U	NM_009972	Csn2	-1.62781	4.32257	3.89228	4.00553
63	a	U	NM_009996	Cyp24a1	2.36207	2.83031	3.02604	2.8682
64	a	U	NM_010430	Hic1	2.52187	2.85612	2.00965	1.61193
65	a	U	NM_010577	Itga5	2.79658	3.19697	2.49093	2.16908
66	a	U	NM_010726	Phyh	2.09818	2.08701	2.33107	1.89362
67	a	U	NM_011648	Tshr	1.60064	2.01547	1.63964	1.55449
68	a	U	NM_013458	Add2	1.98366	2.29621	1.6933	1.58581
69	a	U	NM_013557	Eif2ak1	2.24543	2.50111	1.69783	1.69899
70	a	U	NM_013798	Actg1	1.85294	2.60063	2.16327	1.643
71	a	U	NM_016845	Acrbp	2.59218	2.27251	2.32696	2.26054
72	a	U	NM_019965	Dnajb12	1.97117	1.89917	1.82591	1.94636
73	a	U	NM_020004	Gcn5l2	2.038	2.66058	2.61224	3.28799
74	a	U	NM_020026	B3galnt1	1.79663	1.69798	1.55044	1.75345
75	a	U	NM_020291	Olfr480	2.5658	2.49077	2.56401	2.71201
76	a	U	NM_021327	Tnip1	1.66754	1.70913	1.85891	1.67825
77	a	U	NM_024435	Nts	2.46948	2.91451	2.43987	2.3879
78	a	U	S37484	Agtr1a	2.87	2.53694	3.04778	2.36193
79	a	U	U16179	N/A	2.16941	2.20672	1.87518	1.71152
80	a	U	U69541	N/A	1.80815	2.44104	1.81142	2.01004
81	a	U	U89924	Ppp1r3c	2.7991	2.79215	2.26043	1.9208
82	a	U	U95921	N/A	2.29424	2.28815	1.7994	1.83305
83	a	U	X16496	Hist1h3g	1.71598	3.61863	4.05196	3.84115
84	a	U	X76290	Shh	2.01689	2.01024	1.98783	2.15353
85	a	U	Z12430	N/A	2.27657	2.87435	2.46874	1.90835
86	a	U	Z95478	N/A	1.58734	1.64573	1.87969	2.38983

## Sheet: Table S3-B
Table S3-B. Significant altered gene transcripts in pregnancy (day 5 and 14) and lactancy (day 12)
Down-regulated (z-score > -1.49)
Number	Flag		Gene		Developmental Stage (mean z-score)
			NCBI ID	Official Symbol	P5	P14	L1	L12
1	b	D	Z16406	Meox2	-1.53625	-1.56703	-1.09112	-1.82337
Up-regulated (z-score > 1.49)
Number	Flag		Gene		Developmental Stage (mean z-score)
			NCBI ID	Official Symbol	P5	P14	L1	L12
1	b	U	AF351196	Dscaml1	1.78166	1.83022	1.20248	1.87525
2	b	U	AK002408	Crls1	1.50463	2.52681	0.824009	1.61417
3	b	U	AK006553	1700030J22Rik	2.15204	1.5232	1.37247	1.806
4	b	U	AK008023	Prss32	2.19344	1.64847	1.41528	1.59886
5	b	U	AK012143	Mrpl55	1.56277	2.24287	1.06388	1.80504
6	b	U	AK016052	4930546H06Rik	2.3365	1.95711	1.40482	1.56973
7	b	U	NM_008748	Dusp8	1.9067	1.57704	1.09825	1.61908
8	b	U	X65704	Snrpe	1.86691	1.90345	1.42078	1.56166
9	b	U	X76684	Foxa1	1.61676	2.36133	1.03795	2.05667

## Sheet: Table S3-C
Table S3-C. Significant altered gene transcripts in pregnancy (day 5 and 14) and lactancy (day 1)
Down-regulated (z-score > -1.49)
Number	Flag		Gene		Developmental Stage (mean z-score)
			NCBI ID	Official Symbol	P5	P14	L1	L12
1	c	D	AK011404	D19Ertd737e	-1.55735	-1.65468	-2.00534	-1.07257
2	c	D	AK021311	D530037P16Rik	-1.49479	-1.91712	-2.51411	-1.342
Up-regulated (z-score > 1.49)
Number	Flag		Gene		Developmental Stage (mean z-score)
			NCBI ID	Official Symbol	P5	P14	L1	L12
1	c	U	AB001737	Igk-V8	2.2449	2.35368	1.74241	1.31189
2	c	U	AF217002	Tpcn1	1.90273	1.8141	1.70706	1.23229
3	c	U	AF287260	Creb3l4	1.61141	1.49827	1.64128	1.46645
4	c	U	AF357361	Rnu11	3.09019	3.24584	1.51607	1.32975
5	c	U	AK002995	0710005I21Rik	2.27091	3.03572	2.836	1.30459
6	c	U	AK004855	1300002K09Rik	2.03355	2.62211	2.22763	0.679811
7	c	U	AK004878	Coasy	2.47376	1.73068	1.49096	1.44411
8	c	U	AK006642	1700039I01Rik	2.10796	2.97091	1.87726	1.08506
9	c	U	AK008577	2010317E24Rik	1.52689	2.22497	1.51233	0.926782
10	c	U	AK008761	Tspan17	1.97163	1.94975	1.69601	0.705495
11	c	U	AK009420	Rnf113a2	1.94228	1.92637	2.11968	0.662735
12	c	U	AK009722	2310040G07Rik	1.86359	1.5726	1.76273	1.07997
13	c	U	AK009865	Dzip3	2.01445	2.28099	2.1023	1.00447
14	c	U	AK013108	Flywch2	2.05141	1.57944	1.61768	1.02856
15	c	U	AK015568	4930473O22Rik	1.84953	2.08355	1.89285	1.46349
16	c	U	AK017652	Zfp292	1.66044	1.4968	1.65088	0.342969
17	c	U	AK019729	4930540M03Rik	1.55928	1.55395	1.73555	0.849934
18	c	U	AK020238	8430439B09Rik	1.70413	2.25243	1.69838	0.603323
19	c	U	AK027261	2700018L05Rik	2.31552	2.21499	1.66659	1.28272
20	c	U	BC003483	Mtss1	2.0932	1.90064	1.52625	1.34757
21	c	U	BC009092	3300001P08Rik	2.06233	1.91977	1.77438	1.27851
22	c	U	M10336	Rnu5g	3.13357	3.90858	1.63874	0.991951
23	c	U	NM_008192	Gucy2e	1.64865	1.53369	1.62926	1.06029
24	c	U	NM_009496	Vamp1	1.68354	2.56788	1.65557	1.44359
25	c	U	NM_010157	Esr2	1.85397	1.66226	1.77124	1.31086
26	c	U	NM_010597	Kcnab1	-1.48784	3.25501	4.20087	1.14675
27	c	U	NM_010798	Mif	2.09818	2.46077	1.76644	1.32309
28	c	U	NM_013506	Eif4a2	2.13556	2.51345	1.53304	1.37928
29	c	U	NM_019439	Gabbr1	1.55377	2.72104	1.62321	0.784966
30	c	U	NM_020005	Pcaf	1.50814	1.94733	1.76611	1.41778
31	c	U	NM_029392	N/A	2.68819	2.90382	1.71016	0.0460283
32	c	U	X56029	Rnu3a	1.52512	3.13492	1.73001	0.607656
33	c	U	Z12176	N/A	1.85873	1.59859	1.77042	1.21159

## Sheet: Table S3-D
Table S3-D. Significant altered gene transcripts in pregnancy (day 14) and lactancy (day 1 and 12)
Down-regulated (z-score > -1.49)
Number	Flag		Gene		Developmental Stage (mean z-score)
			NCBI ID	Official Symbol	P5	P14	L1	L12
1	d	D	AA255235	N/A	-1.23778	-1.5738	-1.72039	-2.47756
2	d	D	AF146569	Gprin1	-1.31704	-1.61147	-1.9433	-1.78441
3	d	D	AF236125	Punc	-1.30337	-1.53177	-1.80242	-2.30074
4	d	D	AJ132391	Aldoc	-0.820973	-1.61764	-1.82607	-1.57554
5	d	D	AK012956	Rnf216	-0.996002	-2.11498	-2.38009	-2.54389
6	d	D	AK013604	2900027M19Rik	-1.48326	-1.63608	-1.73372	-1.80623
7	d	D	AK018225	6330532G10Rik	-1.40908	-1.85103	-1.8219	-1.90771
8	d	D	AK018228	Tmem29	-1.04261	-1.76957	-1.56445	-1.73778
9	d	D	BC006060	Lars	-1.3786	-1.75653	-1.70883	-1.80256
10	d	D	NM_010329	Pdpn	-0.977588	-1.54425	-1.69577	-1.7168
11	d	D	NM_025834	Proz	-1.28371	-1.64429	-1.63876	-1.6715
Up-regulated (z-score > 1.49)
Number	Flag		Gene		Developmental Stage (mean z-score)
			NCBI ID	Official Symbol	P5	P14	L1	L12
1	d	U	AB049967	N/A	-0.701896	2.74457	2.74672	2.42433
2	d	U	AB054591	Pip5k2c	-0.830899	2.37519	3.23779	3.23299
3	d	U	AB063319	Rian	1.23779	2.21094	2.29884	1.61904
4	d	U	AF059702	N/A	0.36067	1.77341	1.57935	1.98163
5	d	U	AF093554	N/A	-0.856829	1.52673	2.26314	2.69237
6	d	U	AF133818	Zranb2	0.298391	3.04832	2.15281	2.29925
7	d	U	AF154337	Gpr137b	-1.01518	1.7875	2.76506	3.37309
8	d	U	AJ278735	Cabc1	1.09002	1.53282	1.85118	1.73805
9	d	U	AK003015	0710007G10Rik	-1.10738	3.23155	2.57198	2.7666
10	d	U	AK006916	Spata18	-0.623039	1.73953	2.6027	2.02494
11	d	U	AK006942	1700072O05Rik	1.28935	1.53739	2.04772	1.9463
12	d	U	AK007195	1700113H08Rik	-0.101957	2.06571	2.22616	1.83799
13	d	U	AK007248	1700123E06Rik	-0.141084	1.99677	2.03147	1.86425
14	d	U	AK009013	2300002M23Rik	0.0558392	2.64371	3.31233	3.24221
15	d	U	AK011126	Lsm12	-0.339933	2.07462	2.39873	2.93426
16	d	U	AK011684	2610035F20Rik	-1.09302	3.02541	3.01099	2.78951
17	d	U	AK011923	2610208K16Rik	-0.168367	2.38808	3.12437	3.13554
18	d	U	AK013379	Mctp1	-0.33346	2.53395	2.51191	2.50568
19	d	U	AK013764	2900072D07Rik	0.701142	2.86152	3.09646	2.45436
20	d	U	AK013958	3110001L01Rik	-0.436014	1.69393	2.30458	1.96928
21	d	U	AK014828	4921506M07Rik	-0.541769	1.65412	2.57161	1.94881
22	d	U	AK015632	4930486I03Rik	-1.27333	1.57651	3.05546	2.90135
23	d	U	AK015773	1700025F24Rik	-0.256388	2.09228	2.45143	1.96421
24	d	U	AK015902	4930526H09Rik	-0.715361	2.01024	2.679	3.27036
25	d	U	AK017182	5033421C21Rik	-0.382624	1.72146	2.2648	2.3318
26	d	U	AK017198	Tmem188	-0.25532	1.52806	2.21298	2.46149
27	d	U	AK017289	5430410E06Rik	-1.35424	2.77225	3.22196	2.48642
28	d	U	AK017968	5830433M15Rik	0.662662	1.76552	1.72514	2.11384
29	d	U	AK018096	Ccdc138	-1.19474	1.82559	2.14563	2.46558
30	d	U	AK018872	1700063I16Rik	-0.921629	1.5127	2.66044	2.00408
31	d	U	AK019328	2900037P16Rik	0.0535171	1.68087	2.60342	1.86624
32	d	U	AK019494	Plb1	0.325542	2.51837	2.43845	2.09095
33	d	U	AK020111	6720418B01Rik	-1.38807	3.45878	3.44881	3.28163
34	d	U	AK020918	A930032L01Rik	-0.714395	2.27003	2.02726	2.18408
35	d	U	AK021087	C030017B01Rik	-1.24189	2.83253	3.64468	4.11931
36	d	U	AY033771	Akap13	-1.32591	2.60222	3.81996	2.83525
37	d	U	AY036118	Etf1	1.03759	2.16324	2.67648	2.08039
38	d	U	AY036886	Mll3	0.0289683	1.72989	2.25949	1.65318
39	d	U	BC003937	Epb4.1l5	1.43262	1.94574	1.75793	1.68261
40	d	U	BC006631	Numa1	-1.29037	2.20454	2.75163	1.88399
41	d	U	BC006909	Prr14	1.06602	1.94613	2.30017	1.93398
42	d	U	BC008638	Dars	-0.119416	2.28044	2.69561	2.80833
43	d	U	D29926	N/A	-0.643284	1.90345	2.04491	1.48529
44	d	U	D29939	N/A	1.30053	1.97936	2.21718	1.67404
45	d	U	L05518	N/A	-0.0608833	1.77437	2.90936	2.91678
46	d	U	M16162	Igk-V23	-0.630324	1.93825	2.95444	1.96237
47	d	U	M57991	N/A	-0.450295	1.86477	2.59053	2.45835
48	d	U	M63673	N/A	-0.792365	2.38603	2.91071	1.92224
49	d	U	M92400	N/A	-1.29229	1.96848	3.05899	3.76443
50	d	U	M94020	N/A	-0.143273	2.1464	3.61346	3.71396
51	d	U	NM_007754	Cpd	0.128028	2.14105	2.90927	3.32222
52	d	U	NM_007770	Crx	0.357502	1.95284	2.36157	1.91732
53	d	U	NM_007786	Csn3	1.12701	1.64759	1.93602	1.53813
54	d	U	NM_008040	N/A	-0.0746658	1.53627	1.95444	1.85517
55	d	U	NM_008095	Gbas	-1.33765	2.99598	3.79603	3.53652
56	d	U	NM_008305	Hspg2	0.205437	2.21824	3.33551	3.22516
57	d	U	NM_008521	Ltc4s	1.42385	2.33901	1.58363	1.81787
58	d	U	NM_008611	Mmp8	-0.994689	1.51451	2.69505	2.17277
59	d	U	NM_008765	Orc2l	0.705741	1.5211	2.75879	2.85173
60	d	U	NM_009046	Relb	-0.426408	3.70491	3.83052	4.03939
61	d	U	NM_009100	Rptn	1.09407	1.74549	2.22491	2.3735
62	d	U	NM_009369	Tgfbi	-0.00041321	1.82672	2.00403	2.01238
63	d	U	NM_009633	Adra2b	-0.868188	1.6871	2.23627	2.43646
64	d	U	NM_009696	Apoe	0.244862	2.69124	2.68705	2.97967
65	d	U	NM_009720	Atox1	1.36375	1.99843	1.82267	1.73041
66	d	U	NM_011795	C1ql1	0.995222	1.5402	2.8986	2.76984
67	d	U	NM_011873	Dazap2	-0.419442	2.02668	2.64927	2.24945
68	d	U	NM_013630	Pkd1	0.326519	1.80363	2.09955	2.05632
69	d	U	NM_015731	Atp9a	-0.849411	1.69285	2.57085	2.4418
70	d	U	NM_016798	Pdlim3	-0.305444	2.5819	3.25217	2.76022
71	d	U	NM_017465	Sult2b1	-0.312711	1.89361	2.58633	2.21341
72	d	U	NM_019946	Mgst1	0.753492	1.63362	1.80935	1.60222
73	d	U	NM_026522	Chid1	1.36155	1.96658	2.05849	2.14281
74	d	U	NM_030553	Olfr160	-1.27652	3.26344	3.10287	4.12338
75	d	U	S74697	Span	1.13136	1.51768	1.94719	1.98844
76	d	U	X04211	N/A	1.01493	1.49507	1.86065	2.54251
77	d	U	X17173	N/A	-0.564647	2.42373	2.97084	2.11532
78	d	U	X65980	Mylc2pl	0.0761932	4.11659	4.18383	2.22889
79	d	U	X66656	N/A	-0.636211	2.05414	3.04608	3.04794
80	d	U	Z25735	N/A	-0.686217	2.04303	3.79772	3.82194

## Sheet: Table S3-E
Table S3-E. Significant altered gene transcripts in pregnancy (day 5) and lactancy (day 1 and 12)
Down-regulated (z-score > -1.49)
Number	Flag		Gene		Developmental Stage (mean z-score)
			NCBI ID	Official Symbol	P5	P14	L1	L12
1	e	D	AB010374	Zfp712	-1.53661	-1.46757	-1.59194	-1.81968
2	e	D	AF082159	Grifin	-1.50869	-1.07546	-2.21025	-2.98934
3	e	D	AF090190	Kif1b	-1.62145	-1.32234	-1.97807	-2.03514
4	e	D	AF282301	Olfr148	-1.78913	-1.36748	-2.10591	-2.67119
5	e	D	AJ006585	Eif2s3x-ps1	-1.60709	-1.18906	-1.6135	-2.19203
6	e	D	AJ409484	N/A	-1.77502	-1.25642	-1.83168	-2.33116
7	e	D	AK003679	Cul4a	-1.83029	-1.42266	-1.76416	-2.3663
8	e	D	AK004487	Lhfpl4	-1.63132	-1.41622	-2.56	-1.82046
9	e	D	AK004614	Arrb1	-1.58837	-0.852894	-1.85748	-2.48994
10	e	D	AK006412	1700027F06Rik	-1.51436	-1.29605	-2.15508	-1.99978
11	e	D	AK007385	1810008N23Rik	-1.53289	-1.40064	-1.84911	-2.14465
12	e	D	AK007756	1810043H04Rik	-1.60622	-1.39455	-2.02246	-2.38281
13	e	D	AK008369	2010109N14Rik	-1.57897	-1.27153	-1.93369	-2.67955
14	e	D	AK008908	2210412E05Rik	-1.72825	-1.28182	-1.5894	-3.0659
15	e	D	AK010388	Glt8d1	-1.52907	-1.12069	-1.50064	-2.0228
16	e	D	AK012000	2610306O10Rik	-1.67912	-1.45955	-2.15364	-1.74387
17	e	D	AK013906	3021401C12Rik	-1.872	-1.11205	-2.07623	-1.95013
18	e	D	AK015862	4930521G14Rik	-1.48611	-1.28974	-2.25693	-2.37384
19	e	D	AK016577	Ttll11	-1.72132	-1.42434	-1.92721	-2.01499
20	e	D	AK018053	5830474E16Rik	-1.72546	-1.18995	-1.76615	-1.54636
21	e	D	AK019501	4632418H02Rik	-1.62793	-1.06938	-1.76859	-1.60986
22	e	D	AK020283	9130219B18Rik	-1.49364	-1.16467	-1.67031	-2.0473
23	e	D	AK021189	2810021B07Rik	-1.75056	-1.32433	-1.73924	-1.89007
24	e	D	AY029528	Xpo6	-1.73413	-1.41924	-2.10861	-2.44143
25	e	D	BC005621	Lims1	-1.60336	-1.25454	-1.60153	-1.64613
26	e	D	BC008166	Tax1bp3	-1.56448	-1.39897	-1.74462	-2.20818
27	e	D	BC008995	Tars2	-1.87364	-1.02715	-1.48571	-1.68114
28	e	D	BC009134	Dock9	-1.72369	-1.27507	-1.99797	-1.9924
29	e	D	BC010499	2610301G19Rik	-2.03681	-1.32962	-1.50713	-1.61714
30	e	D	M36516	Zfp28	-1.72329	-1.45797	-1.73124	-2.2731
31	e	D	M60493	Cftr	-2.26801	-1.35285	-1.50759	-2.12533
32	e	D	NM_008610	Mmp2	-1.50304	-1.4105	-1.75693	-2.27278
33	e	D	NM_010518	Igfbp5	-1.52439	-1.38832	-1.98707	-1.87456
34	e	D	NM_016780	Itgb3	-2.18364	-1.4762	-2.44826	-2.92648
35	e	D	NM_016909	Tsnax	-1.66336	-1.46094	-2.03481	-2.13632
36	e	D	NM_026306	0610038D11Rik	-1.829	-1.21388	-1.7512	-2.08141
37	e	D	X06746	Egr2	-1.4989	-1.31142	-2.09492	-2.345
38	e	D	X16216	N/A	-1.85429	-1.32931	-2.33695	-3.13895
Up-regulated (z-score > 1.49)
Number	Flag		Gene		Developmental Stage (mean z-score)
			NCBI ID	Official Symbol	P5	P14	L1	L12
1	e	U	AJ272163	Esr1	2.26515	1.24296	1.58828	1.50314
2	e	U	AK015631	4930486G11Rik	1.59596	1.19669	1.8651	1.67417
3	e	U	AK016953	Cage1	1.64243	1.45341	2.03718	1.96851
4	e	U	NM_007898	Doc2b	2.27704	0.0916255	1.60381	1.97249
5	e	U	NM_008710	Nnt	2.30176	1.33676	2.05541	1.59833

## Sheet: Table S3-F
Table S3-F. Significant altered gene transcripts in pregnancy (day 5 and 14)
Up-regulated (z-score > 1.49)
Number	Flag		Gene		Developmental Stage (mean z-score)
			NCBI ID	Official Symbol	P5	P14	L1	L12
1	f	U	AF081116	Taf1	2.59868	3.10396	1.33763	-0.0431306
2	f	U	AF330197	Rnf111	2.70709	3.1048	1.26596	-0.0466819
3	f	U	AK005902	Wdr68	2.21096	2.34146	0.363762	-0.136312
4	f	U	AK007969	1810073G21Rik	1.8891	1.71626	1.02834	1.42703
5	f	U	AK009575	Bdh	1.50673	1.64132	0.961097	0.948616
6	f	U	AK010766	Mtif2	1.90906	1.94676	1.40924	1.16129
7	f	U	AK010940	2510009E07Rik	2.40916	1.587	0.732199	0.592308
8	f	U	AK018341	B230217C12Rik	1.56987	2.42826	0.632649	-0.602215
9	f	U	AK020990	B230206I08Rik	3.79213	2.05357	1.37625	0.575906
10	f	U	AK021065	C030011I16Rik	1.94756	1.65348	1.21705	1.34234
11	f	U	AY005469	Sult1c1	2.52669	2.54639	1.3981	-0.0521483
12	f	U	M18091	N/A	2.44394	2.38811	0.938753	-0.240793
13	f	U	NM_010423	Hey1	1.7754	1.91768	1.07885	1.41498
14	f	U	NM_011624	Top3b	2.1574	2.66086	1.00302	-0.224691
15	f	U	NM_011856	Odz2	2.80439	2.20554	1.37389	1.45227
16	f	U	NM_016673	Cntfr	2.70694	1.49186	1.4687	1.12017
17	f	U	NM_019454	Dll4	1.85039	1.49041	1.3083	1.47013
18	f	U	NM_026310	Mrpl18	2.0581	2.20876	1.31998	1.0872
19	f	U	NM_028146	Dbndd1	1.66204	1.68076	1.05874	0.956171
20	f	U	U89415	Eef2	1.56896	1.86736	1.34262	1.39013
21	f	U	Y11896	Chic1	1.87425	1.54737	1.28981	1.35931

## Sheet: Table S3-G
Table S3-G. Significant altered gene transcripts in pregnancy (day 5) and lactancy (day 1)
Down-regulated (z-score > -1.49)
Number	Flag		Gene		Developmental Stage (mean z-score)
			NCBI ID	Official Symbol	P5	P14	L1	L12
1	g	D	AK017733	Wbscr16	-1.90781	-1.30241	-1.65511	-1.43481
2	g	D	BC005610	Tada2l	-1.80587	-1.37362	-1.8009	-1.44342
3	g	D	BC011472	Kdelr3	-1.86422	-1.32882	-1.74474	-1.45899
Up-regulated (z-score > 1.49)
Number	Flag		Gene		Developmental Stage (mean z-score)
			NCBI ID	Official Symbol	P5	P14	L1	L12
1	g	U	AK019652	4930482J15Rik	2.08925	1.37042	1.60638	0.725905
2	g	U	BC007193	C130026I21Rik	1.99819	1.44438	1.60875	1.42416
3	g	U	NM_008184	Gstm6	1.69575	1.04078	1.57419	1.34394
4	g	U	U55455	N/A	1.61697	1.26282	1.83738	1.31946

## Sheet: Table S3-H
Table S3-H. Significant altered gene transcripts in pregnancy (day 5) and lactancy (day 12)
Down-regulated (z-score > -1.49)
Number	Flag		Gene		Developmental Stage (mean z-score)
			NCBI ID	Official Symbol	P5	P14	L1	L12
1	h	D	AK005166	Ihpk2	-1.74761	-1.47285	-1.40206	-1.69194
2	h	D	AK006964	1700081D17Rik	-1.62364	-1.39101	-1.29672	-1.65205
3	h	D	AK006973	1700081N11Rik	-1.63562	-0.949162	-1.39316	-2.30265
4	h	D	AK010289	Rpain	-1.6215	-0.869143	-1.14827	-1.55037
5	h	D	AK011091	2510042H03Rik	-1.64588	-0.723019	-1.25608	-1.85092
6	h	D	AK012292	Entpd6	-1.98268	-0.689679	-0.733438	-1.57841
7	h	D	AK014123	3110035E14Rik	-1.56266	-1.12944	-1.38195	-2.40852
8	h	D	AK014748	4833422B07Rik	-1.73742	-0.998958	-1.03953	-1.85996
9	h	D	AK015383	4930444M15Rik	-1.52674	-1.13103	-1.43362	-1.84041
10	h	D	AK016773	Rbbp5	-1.53808	-1.06574	-1.15318	-1.75326
11	h	D	AK018084	Gpsm2	-1.55148	-0.679568	-1.10163	-1.71051
12	h	D	AK019660	4930488B04Rik	-1.52187	-0.932379	-0.591716	-1.67036
13	h	D	BC009127	Ing4	-1.71949	-0.769265	-1.25678	-1.90751
14	h	D	NM_009429	Tpt1	-1.5593	-1.29516	-1.29331	-1.91197
15	h	D	NM_009571	Zfy2	-1.57328	-1.31247	-1.44776	-1.98187
16	h	D	NM_013810	Dbnl	-1.50053	-1.20205	-1.25274	-1.60534
17	h	D	NM_018883	Camkk1	-1.53734	-0.804132	-1.35575	-1.97599
18	h	D	NM_019689	Arid3b	-1.57868	-0.575806	-1.11519	-2.90077
Up-regulated (z-score > 1.49)
Number	Flag		Gene		Developmental Stage (mean z-score)
			NCBI ID	Official Symbol	P5	P14	L1	L12
1	h	U	AF041943	N/A	1.76222	1.31545	1.32763	1.5528
2	h	U	AF144975	Igh-VJ558	1.8239	1.32719	1.31141	1.71212
3	h	U	AK003042	Oxt	1.68111	1.02169	1.29979	1.5142
4	h	U	AK019721	4930535L15Rik	1.76712	1.37982	1.23849	1.66464
5	h	U	NM_007761	Crcp	1.51918	1.25399	1.32952	1.70953
6	h	U	NM_025594	Zmat2	1.96938	1.44081	1.48062	1.59629
7	h	U	NM_025605	2400001E08Rik	1.79458	0.904527	1.22876	1.65052
8	h	U	Y10969	RGD1311093	2.20687	0.673557	1.30745	1.8521

## Sheet: Table S3-I
Table S3-I. Significant altered gene transcripts in pregnancy (day 14) and lactancy (day 1)
Down-regulated (z-score > -1.49)
Number	Flag		Gene		Developmental Stage (mean z-score)
			NCBI ID	Official Symbol	P5	P14	L1	L12
1	i	D	AK004090	1110034G24Rik	-1.17537	-1.63095	-1.87711	-1.13659
2	i	D	AK020464	9430041J12Rik	-1.24623	-1.60921	-1.78833	-1.43409
Up-regulated (z-score > 1.49)
Number	Flag		Gene		Developmental Stage (mean z-score)
			NCBI ID	Official Symbol	P5	P14	L1	L12
1	i	U	AK008176	Myo1a	1.1515	2.02782	2.02482	1.40747
2	i	U	AK011694	Zfp820	1.1136	1.75212	1.56935	0.775153
3	i	U	AK012317	Snapc1	1.14361	1.91074	2.2937	1.45816
4	i	U	AK013617	2900035J10Rik	1.30876	1.63657	1.75339	1.47475
5	i	U	AK018070	Lpo	-0.868521	2.06091	2.90572	0.919762
6	i	U	AK020861	A930015G24Rik	0.944613	2.48913	1.81861	1.26693
7	i	U	BC005708	2610018G03Rik	-1.30705	1.93447	3.03229	-0.410999
8	i	U	NM_009043	Reg2	1.41306	1.53612	1.86683	1.35154
9	i	U	NM_009175	St6gal1	-0.994597	2.56794	3.73331	0.273682
10	i	U	NM_010287	Gpr83	-0.926031	1.86225	3.69999	-0.0360015
11	i	U	NM_010556	Il3	-0.435127	2.03441	2.7848	0.781349
12	i	U	NM_010570	Irs1	-0.149402	2.121	2.96141	0.247561
13	i	U	NM_013754	Insl6	1.31208	2.12606	1.73585	1.00596
14	i	U	NM_013788	Peg12	-0.659498	1.51848	2.73001	0.0566679
15	i	U	NM_027137	Sprrl7	-0.323929	1.94867	2.12736	-0.300027
16	i	U	U05672	Adora2a	1.41795	2.38585	1.70347	0.388729
17	i	U	U09054	Ube1y1-ps2	-0.0698972	1.62529	1.84975	0.959077
18	i	U	U89889	Hpx	1.07194	1.75907	2.17794	1.36052

## Sheet: Table S3-J
Table S3-J. Significant altered gene transcripts in pregnancy (day 14) and lactancy (day 12)
Down-regulated (z-score > -1.49)
Number	Flag		Gene		Developmental Stage (mean z-score)
			NCBI ID	Official Symbol	P5	P14	L1	L12
1	j	D	AB010319	Zfp287	-0.909526	-1.83332	-1.43688	-1.77685
2	j	D	AK016413	4930599A14Rik	-0.257185	-1.54897	-1.41332	-1.87018
3	j	D	AK019761	4930552P06Rik	-1.02058	-1.68862	-1.47181	-1.51869
4	j	D	NM_007814	Cyp2b19	-1.26455	-1.51908	-1.3849	-1.88046
5	j	D	NM_009738	Bche	-1.08246	-1.58779	-1.46681	-2.16922
6	j	D	U95030	Alcam	-1.36437	-1.5691	-0.911071	-1.92881
Up-regulated (z-score > 1.49)
Number	Flag		Gene		Developmental Stage (mean z-score)
			NCBI ID	Official Symbol	P5	P14	L1	L12
1	j	U	AK004375	Abhd13	0.593831	2.3657	1.3663	2.51417
2	j	U	AK017442	Krtap2-4	-1.04762	1.49978	1.2129	2.48386
3	j	U	AK018741	0610011L14Rik	0.354621	1.69661	1.45634	2.01831
4	j	U	L17335	Ggt1	1.19549	1.7309	1.45188	1.68348
5	j	U	NM_011069	Pex11b	0.764251	1.7131	1.3391	1.5831
6	j	U	NM_019728	Defb4	1.3853	1.92338	1.35418	1.62641
7	j	U	NM_019956	Krt71	0.827145	1.80643	1.19048	1.56809
8	j	U	S58460	N/A	1.07848	1.83088	1.29011	1.69777

[truncated: 5 more sheets: Table S3-K, Table S3-L, Table S3-M, Table S3-N, Table S3-O]
