# Supplementary material for: Identification of Putative Ortholog Gene Blocks Involved in Gestant and Lactating Mammary Gland Development: A Rodent Cross-Species Microarray Transcriptomics Approach
Source: Int J Genomics. 2013 Oct 30;2013:624681. doi: 10.1155/2013/624681 (PMC3830774; doi:10.1155/2013/624681)
Supplement: Supplementary file 1 — This manuscript contains supplementary material to give a better overview of the results. In Table S1 we are describing the experimental design of heterologous microarrays hybridization; in Table S2 we showed the primers and probes for the qRT-PCR analysis for confirmation of microarray results. In S3 we are showing the list of up- and downregulated genes during pregnancy (P5, P14) and/or lactation (L1, L12) that shared spatial and temporal distributions. In S4 we described all the gene hierarchical cluster sets of altered gene transcript. In S5 is the list of altered gene transcript K-means cluster sets that correspond to potential groups of co-regulated genes. K-means clustering revealed six distinct clusters (K1-6) that distinguished up from down, early from middle, and transient from sustained changes in expression. The data from Table S6 shows the list of orthologous significant altered gene transcripts to rat and/or human in pregnancy (day 5 and 14) and lactancy (day 1 and 12). The Table S7 shows the list of families of transcription factors identified in different stage development of mammary gland. Finally in Table S8 we are describing the functional gene blocks detailed information. [file 624681.f1.zip › 624681.f4.xlsx]

## Sheet: Table S4-C1
Number	Flag	Gene		Eweight	Gweight	Developmental stage
		NCBI ID	Official Symbol			P5	P14	L1	L12
1	C1	AA255235	Rdh9	GENE602X	0.064509	-1.23778	-1.5738	-1.72039	-2.47756
2	C1	AB010319	Zfp287	GENE372X	0.169001	-0.909526	-1.83332	-1.43688	-1.77685
3	C1	AB010325	Zfp9	GENE603X	0.09776	-0.212431	-0.752299	-1.58295	-1.7565
4	C1	AB010358	Zfp317	GENE604X	0.056267	-0.58439	-0.472182	-1.37056	-2.19462
5	C1	AB010374	Zfp712	GENE605X	0.02462	-1.53661	-1.46757	-1.59194	-1.81968
6	C1	AB026997	Cast	GENE606X	0.031646	-0.555233	-0.911766	-1.6144	-1.72165
7	C1	AB055854	Gmcl1l	GENE607X	0.02303	-1.41296	-1.28245	-1.55251	-1.56163
8	C1	AF011414	Vmn2r42	GENE608X	0.018235	-0.975104	-0.803844	-1.48665	-2.07024
9	C1	AF016710	N/A	GENE609X	0.060303	-0.63161	-0.566152	-1.52754	-2.29762
10	C1	AF053956	Runx2	GENE150X	0.014749	-1.29441	-1.19687	-1.67779	-1.78567
11	C1	AF061529	Herc2	GENE151X	0.021129	-1.12143	-0.86163	-1.77961	-1.74085
12	C1	AF073882	Mtmr7	GENE373X	1.0	-0.970112	-2.75266	-0.978552	-1.44967
13	C1	AF112439	Fancg	GENE611X	0.027781	-1.38253	-1.30341	-1.20195	-1.92074
14	C1	AF117340	Map3k1	GENE314X	0.297273	-1.89299	-1.24434	-1.10238	-1.12323
15	C1	AF119148	Flnc	GENE612X	0.031346	-0.644595	-0.546327	-1.27329	-1.63661
16	C1	AF120319	N/A	GENE613X	1.0	-0.608538	-0.471086	0.14269	-2.2976
17	C1	AF126457	X76971	GENE614X	0.016594	-0.900992	-1.1004	-1.40639	-1.67243
18	C1	AF133093	L1cam / Abcd1 / Ssr4 / Idh3g / Plxnb3 / Srpk3 / Ard1 / Plxn6-pending / Arhgap4 / Hcfc1 / Pdzd4 / Renbp / Avpr2	GENE615X	0.016616	-1.30725	-0.884564	-1.50497	-1.93282
19	C1	AF146569	Gprin1	GENE475X	0.039073	-1.31704	-1.61147	-1.9433	-1.78441
20	C1	AF176516	Polr2f	GENE616X	0.021999	-0.772741	-0.818313	-1.36753	-1.55868
21	C1	AF176528	Fbxw14	GENE476X	0.021723	-0.690837	-1.03767	-1.56677	-1.77978
22	C1	AF184275	Fbxo18	GENE617X	0.016964	-0.900658	-1.22478	-1.47473	-1.76667
23	C1	AF236125	Punc	GENE154X	0.033088	-1.30337	-1.53177	-1.80242	-2.30074
24	C1	AF251268	Slc5a4b	GENE618X	0.033024	-1.09737	-0.560991	-1.62152	-1.92475
25	C1	AF254422	Pax7	GENE619X	0.072409	-1.14883	-0.513122	-0.848549	-1.73167
26	C1	AF280809	Dusp3	GENE155X	0.053744	-1.10098	-1.47115	-2.04675	-2.29527
27	C1	AF282291	Olfr926	GENE315X	0.215722	-1.89592	-0.78742	-0.907022	-0.990286
28	C1	AF295402	Scamp2	GENE620X	1.0	-1.20724	-0.739315	-0.312915	-2.44416
29	C1	AF303831	Rdh14	GENE621X	0.768437	-0.69671	0.196535	0.0254616	-1.85508
30	C1	AF312924	Ralgps2	GENE622X	0.022577	-0.938057	-1.00766	-1.54023	-2.21374
31	C1	AF319983	Magee2	GENE477X	0.021912	-1.17608	-0.940842	-1.80925	-1.69388
32	C1	AF357458	N/A	GENE623X	0.016358	-0.800454	-0.890709	-1.35032	-1.86861
33	C1	AF408400	Ppp1r14d	GENE624X	0.062631	-0.910265	-0.446782	-1.68652	-2.256
34	C1	AJ006585	Eif2s3x-ps1	GENE236X	0.026626	-1.60709	-1.18906	-1.6135	-2.19203
35	C1	AJ132391	Aldoc	GENE158X	0.122544	-0.820973	-1.61764	-1.82607	-1.57554
36	C1	AJ245945	Ngb	GENE159X	0.026908	-1.38145	-0.965121	-1.88836	-2.14587
37	C1	AJ278123	Synpo	GENE478X	0.039273	-0.443896	-0.805717	-1.50174	-1.65042
38	C1	AJ292968	Sav1	GENE625X	0.021056	-1.22119	-1.05144	-1.43866	-2.20873
39	C1	AK002276	0610007C21Rik (Apr3)	GENE626X	0.013598	-1.24531	-1.19066	-1.4771	-1.87653
40	C1	AK003316	Mbnl2	GENE316X	0.235144	-1.52268	-0.822409	-0.697381	-1.09532
41	C1	AK003432	Xpot	GENE627X	0.022316	-0.999606	-1.25876	-1.45632	-1.54498
42	C1	AK003996	Klk5	GENE628X	0.026273	-0.866044	-0.947368	-1.56725	-2.23676
43	C1	AK004090	1110034G24Rik	GENE374X	0.210187	-1.17537	-1.63095	-1.87711	-1.13659
44	C1	AK004153	1110038D17Rik (C22orf13 (LLN4))	GENE160X	0.019001	-1.38606	-1.12144	-1.87056	-2.04871
45	C1	AK004309	Rab3gap2	GENE629X	0.02376	-0.625318	-0.947533	-1.51839	-1.90894
46	C1	AK004457	1190002N15Rik (UPF0672 protein C3orf58)	GENE479X	0.021918	-1.29535	-1.33526	-1.90586	-1.78478
47	C1	AK005166	Ihpk2	GENE317X	0.056305	-1.74761	-1.47285	-1.40206	-1.69194
48	C1	AK005212	Sdccag1	GENE631X	0.028906	-0.801348	-0.841807	-1.00686	-1.76398
49	C1	AK005338	Snx15	GENE632X	0.021279	-0.690835	-0.856634	-1.34111	-1.64727
50	C1	AK005649	1700003L19Rik	GENE161X	0.049437	-1.31591	-1.46835	-1.87609	-2.50963
51	C1	AK005677	1700006H21Rik	GENE633X	0.034624	-1.04229	-0.852819	-0.949545	-1.82146
52	C1	AK006064	1700017G19Rik	GENE634X	0.02479	-0.587864	-0.883812	-1.50302	-1.75717
53	C1	AK006118	Wdr16	GENE635X	0.021725	-1.07092	-1.20734	-1.41676	-2.18818
54	C1	AK006223	1700021N20Rik	GENE636X	1.0	-0.891096	0.571643	-0.529165	-2.27456
55	C1	AK006245	1700022K14Rik	GENE637X	0.014895	-1.3027	-1.30539	-1.64138	-1.95949
56	C1	AK006438	Eid3	GENE164X	0.020116	-1.33718	-1.22378	-1.94295	-1.98626
57	C1	AK006597	1700034J04Rik	GENE638X	0.036735	-0.826245	-0.437453	-1.37449	-2.07586
58	C1	AK006651	1700040D17Rik	GENE639X	0.042983	-1.23503	-0.76993	-0.931299	-1.79834
59	C1	AK006729	1700048J15Rik	GENE640X	0.015565	-0.846589	-0.957663	-1.3528	-1.77065
60	C1	AK006784	N/A	GENE375X	1.0	-0.889086	-1.69525	-0.672298	-1.11906
61	C1	AK006873	1700063K16Rik	GENE481X	0.197326	-1.30128	-1.11646	-1.56834	-0.932103
62	C1	AK006934	1700072B07Rik	GENE165X	0.023587	-1.08801	-1.41017	-1.83747	-1.98347
63	C1	AK006964	1700081D17Rik (Pebp4)	GENE641X	0.042233	-1.62364	-1.39101	-1.29672	-1.65205
64	C1	AK006981	1700082O11Rik	GENE643X	0.016827	-1.38923	-1.11015	-1.36411	-1.88579
65	C1	AK007002	1700085B03Rik	GENE644X	0.025192	-1.45166	-1.33715	-1.65727	-2.31311
66	C1	AK007091	Loxhd1	GENE645X	0.112558	-1.1777	-0.34848	-1.63988	-2.22167
67	C1	AK007300	1700127G19Rik	GENE646X	0.279088	-0.266899	-0.857072	-0.642327	-1.66531
68	C1	AK007385	1810008N23Rik (Amy2)	GENE166X	0.023157	-1.53289	-1.40064	-1.84911	-2.14465
69	C1	AK007445	Trim15	GENE482X	0.151451	-1.11758	-1.24644	-1.76768	-1.02365
70	C1	AK007483	Nradd	GENE647X	0.267093	-0.601746	-1.39317	-1.48725	-2.4592
71	C1	AK007894	Ndufaf2	GENE648X	0.019796	-0.723108	-0.936016	-1.37565	-1.65939
72	C1	AK008055	Pard3b	GENE483X	0.058847	-1.07819	-0.890308	-1.60735	-1.24171
73	C1	AK008108	Sulf2	GENE649X	0.064217	-0.94267	-0.299983	-1.09914	-1.62094
74	C1	AK008157	2010008C14Rik	GENE650X	0.035709	-1.44924	-1.12278	-1.08258	-1.6238
75	C1	AK008389	Ceacam18	GENE652X	0.01568	-1.2036	-1.25871	-1.71739	-2.06309
76	C1	AK008890	Zfp84	GENE484X	0.03709	-1.45108	-0.94429	-1.54857	-1.42677
77	C1	AK008972	Golga1	GENE654X	0.052314	-0.76312	-0.419237	-0.934811	-1.77624
78	C1	AK009063	Trak1	GENE168X	0.045764	-0.755835	-0.720466	-1.70095	-2.25199
79	C1	AK009331	Arhgef12	GENE655X	0.024845	-1.34305	-1.42133	-1.90472	-2.21724
80	C1	AK009505	Slamf9	GENE485X	0.06953	-0.826337	-0.635613	-1.61715	-1.34733
81	C1	AK009780	2310043J07Rik	GENE656X	0.014544	-1.07503	-0.886162	-1.61734	-1.82383
82	C1	AK010059	2310066D07Rik	GENE657X	0.01758	-1.20227	-1.11741	-1.21176	-1.78679
83	C1	AK010289	Rpain	GENE318X	0.052981	-1.6215	-0.869143	-1.14827	-1.55037
84	C1	AK010388	Glt8d1	GENE658X	0.020092	-1.52907	-1.12069	-1.50064	-2.0228
85	C1	AK010976	2510017J16Rik	GENE659X	0.108599	-0.945092	-0.198697	-1.60567	-2.23603
86	C1	AK011091	2510042H03Rik	GENE660X	0.072634	-1.64588	-0.723019	-1.25608	-1.85092
87	C1	AK011175	Elavl3	GENE661X	0.017356	-1.42679	-1.0147	-1.50783	-1.73879
88	C1	AK011250	2610001A08Rik	GENE662X	0.030671	-0.601226	-0.583145	-1.34891	-1.64366
89	C1	AK011318	2610005G05Rik	GENE663X	0.020192	-1.09721	-0.760877	-1.5678	-2.06372
90	C1	AK011404	D19Ertd737e	GENE486X	0.432385	-1.55735	-1.65468	-2.00534	-1.07257
91	C1	AK011534	Bmpr2	GENE376X	1.0	-1.0362	-1.93689	0.236301	-1.31179
92	C1	AK012292	Entpd6	GENE319X	0.49659	-1.98268	-0.689679	-0.733438	-1.57841
93	C1	AK012530	Dusp4	GENE169X	0.018319	-1.14509	-0.998899	-1.82632	-1.95457
94	C1	AK012591	2700089I24Rik	GENE664X	0.016241	-1.15348	-1.27268	-1.62293	-1.70189
95	C1	AK013356	Zfp839	GENE665X	0.016529	-0.869908	-0.777332	-1.33775	-1.77133
96	C1	AK013412	Ccdc137	GENE666X	0.070877	-0.997276	-0.266976	-1.45724	-1.88067
97	C1	AK013481	Epha4	GENE320X	0.205049	-2.00892	-1.06616	-1.06231	-1.28641
98	C1	AK013491	Macrod2	GENE667X	0.08245	-0.476549	-0.354431	-0.9049	-1.88412
99	C1	AK013565	2900021C02Rik	GENE668X	0.027904	-1.32401	-1.00606	-1.95181	-2.15237
100	C1	AK013604	2900027M19Rik	GENE490X	0.035171	-1.48326	-1.63608	-1.73372	-1.80623
101	C1	AK014240	3110068A07Rik	GENE491X	0.029682	-1.21447	-1.07547	-1.6184	-1.40519
102	C1	AK014404	3732407C23Rik	GENE670X	0.241427	-0.32163	0.0282398	-0.903565	-1.72973
103	C1	AK014624	Depdc6	GENE671X	0.019038	-0.985367	-0.759558	-1.35101	-1.60621
104	C1	AK014697	Tm7sf4	GENE672X	0.01894	-0.966977	-1.08935	-1.19388	-1.74733
105	C1	AK014745	4833421G17Rik	GENE673X	0.019616	-1.10391	-1.24186	-1.84852	-2.05504
106	C1	AK014748	4833422B07Rik	GENE674X	0.078319	-1.73742	-0.998958	-1.03953	-1.85996
107	C1	AK014764	N/A	GENE675X	0.015851	-1.33465	-1.26825	-1.53817	-2.04654
108	C1	AK014869	Spata16	GENE676X	0.014256	-1.04382	-1.08553	-1.66718	-1.78363
109	C1	AK014882	4921513I03Rik	GENE677X	0.016678	-1.12623	-1.14192	-1.6825	-2.1405
110	C1	AK014953	4921523P09Rik	GENE678X	0.145183	-1.29453	-0.326525	-0.946286	-1.95966
111	C1	AK014964	4921525B02Rik	GENE321X	0.124597	-1.76978	-0.798928	-1.22347	-1.27409
112	C1	AK015161	Morn1	GENE679X	0.032109	-1.01399	-1.16558	-1.02193	-1.7871
113	C1	AK015281	4930431P22Rik	GENE680X	0.019758	-1.12573	-1.24967	-1.2477	-1.71678
114	C1	AK015383	4930444M15Rik	GENE681X	0.019825	-1.52674	-1.13103	-1.43362	-1.84041
115	C1	AK015479	4930456K20Rik	GENE682X	0.013815	-1.2401	-1.10517	-1.40772	-1.89641
116	C1	AK015569	4930425L21Rik	GENE683X	0.017922	-0.958541	-0.793956	-1.24045	-1.70717
117	C1	AK015647	4930488L21Rik	GENE684X	0.137134	-0.344468	-0.154515	-1.36713	-1.87534
118	C1	AK015653	4930500A05Rik	GENE172X	0.047323	-1.103	-0.728595	-1.93618	-2.1503
119	C1	AK015673	Fam154a	GENE492X	0.036101	-1.31566	-1.46537	-1.67907	-1.48854
120	C1	AK015702	4930505G20Rik	GENE685X	0.014593	-1.02465	-0.910756	-1.49715	-1.99435
121	C1	AK016003	4930539N22Rik	GENE174X	0.024639	-1.09945	-1.24955	-1.87645	-1.69378
122	C1	AK016146	4930556I23Rik	GENE175X	0.014715	-1.21459	-1.10275	-1.72669	-1.82401
123	C1	AK016153	4930556N13Rik	GENE493X	0.032911	-0.799868	-0.610101	-1.57934	-1.57482
124	C1	AK016326	4930579J19Rik	GENE494X	0.028914	-1.22127	-0.897766	-1.88581	-1.7077
125	C1	AK016413	4930599A14Rik	GENE377X	0.895609	-0.257185	-1.54897	-1.41332	-1.87018
126	C1	AK016518	Dscam	GENE495X	0.047659	-0.708438	-1.2998	-1.70446	-2.13019
127	C1	AK016529	Clec16a	GENE686X	0.047975	-1.2619	-0.724354	-1.0211	-1.51279
128	C1	AK016539	4932431P20Rik	GENE687X	0.067898	-0.753328	-0.242309	-1.26115	-1.64847
129	C1	AK016652	4933404K08Rik	GENE688X	0.024305	-1.3128	-0.869904	-1.46473	-1.52407
130	C1	AK016773	Rbbp5	GENE689X	0.032178	-1.53808	-1.06574	-1.15318	-1.75326
131	C1	AK016828	4933416A02Rik	GENE690X	0.064079	-1.35105	-0.619697	-1.65136	-1.56245
132	C1	AK017291	Stx16	GENE691X	0.018462	-0.820587	-1.20031	-1.52801	-1.85656
133	C1	AK017319	5430419D17Rik (putative DMBT1-like protein)	GENE692X	0.021176	-0.682068	-0.939301	-1.46021	-1.9707
134	C1	AK017509	Lca5	GENE177X	0.021765	-1.17885	-1.39725	-1.85527	-2.0783
135	C1	AK017578	Nrxn1	GENE693X	0.093274	-0.303841	-0.8322	-1.02965	-1.55481
136	C1	AK017733	Wbscr16	GENE322X	0.10776	-1.90781	-1.30241	-1.65511	-1.43481
137	C1	AK017945	5830424K16Rik	GENE178X	0.015718	-1.43684	-1.12303	-1.66141	-1.91378
138	C1	AK018043	5830468K08Rik	GENE694X	0.051761	-1.41554	-1.36338	-1.0636	-1.94704
139	C1	AK018053	5830474E16Rik	GENE496X	0.047998	-1.72546	-1.18995	-1.76615	-1.54636
140	C1	AK018084	Gpsm2	GENE695X	0.063464	-1.55148	-0.679568	-1.10163	-1.71051
141	C1	AK018175	6330415B21Rik	GENE696X	0.035562	-1.36529	-1.23734	-1.07311	-1.67615
142	C1	AK018228	Tmem29	GENE229X	0.078401	-1.04261	-1.76957	-1.56445	-1.73778
143	C1	AK018314	Klhl24	GENE697X	0.020492	-1.42847	-0.920186	-1.66225	-2.0099
144	C1	AK018342	Rtf1	GENE179X	0.020115	-1.20287	-1.21325	-1.90334	-2.08304
145	C1	AK018414	8430415E04Rik (Kiaa1622 (Pp4r4) (Ppp4r4))	GENE698X	1.0	-1.19723	-0.785712	0.541126	-1.74801
146	C1	AK018427	8430419K02Rik	GENE180X	0.029969	-1.2562	-1.47933	-1.69298	-2.29515
147	C1	AK018900	1700080C20Rik	GENE699X	0.028136	-0.535097	-0.937923	-1.36919	-1.85627
148	C1	AK019094	2310046O06Rik	GENE700X	0.017389	-1.09903	-0.971953	-1.23175	-1.67208
149	C1	AK019114	2400009B08Rik	GENE701X	0.022824	-1.00068	-1.25438	-1.6409	-2.2193
150	C1	AK019322	Ttyh3	GENE323X	0.067828	-1.63011	-1.07931	-1.12149	-1.40439
151	C1	AK019480	Fam122b	GENE702X	0.016813	-0.803332	-1.07986	-1.4383	-1.86041
152	C1	AK019485	2810403D21Rik	GENE703X	0.021072	-1.23094	-0.96825	-1.4734	-2.19176
153	C1	AK019501	4632418H02Rik	GENE704X	0.035467	-1.62793	-1.06938	-1.76859	-1.60986
154	C1	AK019660	4930488B04Rik	GENE705X	0.22904	-1.52187	-0.932379	-0.591716	-1.67036
155	C1	AK019691	4930522O17Rik	GENE706X	0.022546	-1.02434	-1.00361	-1.14678	-1.61475
156	C1	AK019761	4930552P06Rik	GENE380X	0.093196	-1.02058	-1.68862	-1.47181	-1.51869
157	C1	AK019999	5830406C21Rik	GENE181X	0.029874	-1.33997	-1.29241	-1.91057	-2.37793
158	C1	AK020211	8030459D09Rik	GENE707X	0.036305	-0.728781	-0.835773	-0.945237	-1.7882
159	C1	AK020283	9130219B18Rik	GENE182X	0.017727	-1.49364	-1.16467	-1.67031	-2.0473
160	C1	AK020464	9430041J12Rik	GENE497X	0.066024	-1.24623	-1.60921	-1.78833	-1.43409
161	C1	AK020584	9530034A14Rik	GENE708X	0.057128	-0.376748	-0.835627	-1.06404	-1.70284
162	C1	AK020752	Tmem86b	GENE498X	0.0364	-0.93298	-0.714681	-1.82629	-1.73101
163	C1	AK020870	Zbtb20	GENE709X	0.038321	-0.540623	-0.685006	-1.15634	-2.02918
164	C1	AK020947	A930040O22Rik	GENE710X	0.019381	-0.752968	-0.987158	-1.30129	-1.69751
165	C1	AK021019	Svil	GENE711X	0.014018	-1.0501	-1.21792	-1.48615	-1.83368
166	C1	AK021079	C030014C12Rik	GENE712X	0.03071	-1.12724	-0.912002	-1.12201	-1.47661
167	C1	AK021132	Gprin3	GENE714X	0.015304	-1.3079	-1.05755	-1.5488	-2.04519
168	C1	AK021303	D530031A16Rik	GENE716X	0.330083	-0.704379	0.0586363	-1.19574	-2.32125
169	C1	BC003957	Fam131a	GENE499X	0.352062	-1.12821	-1.14283	-1.55593	-0.653979
170	C1	BC005610	Tada2l	GENE223X	0.085433	-1.80587	-1.37362	-1.8009	-1.44342
171	C1	BC005621	Lims1	GENE500X	0.02607	-1.60336	-1.25454	-1.60153	-1.64613
172	C1	BC006060	Lars	GENE501X	0.054848	-1.3786	-1.75653	-1.70883	-1.80256
173	C1	BC008158	Ifi35	GENE184X	0.045322	-1.50722	-1.64065	-1.86935	-1.71602
174	C1	BC008166	Tax1bp3	GENE717X	0.024957	-1.56448	-1.39897	-1.74462	-2.20818
175	C1	BC008617	Unc119b	GENE718X	0.020967	-1.07105	-0.942909	-1.55522	-1.49849
176	C1	BC008995	Tars2	GENE239X	0.063666	-1.87364	-1.02715	-1.48571	-1.68114
177	C1	BC009127	Ing4	GENE240X	0.086749	-1.71949	-0.769265	-1.25678	-1.90751
178	C1	BC010499	2610301G19Rik (KIAA1967 (DBC1))	GENE324X	0.120146	-2.03681	-1.32962	-1.50713	-1.61714
179	C1	BC011152	Golm1	GENE719X	0.034926	-0.80882	-0.547389	-1.11403	-2.02028
180	C1	BC011313	Ubfd1	GENE720X	0.018082	-1.29447	-1.0399	-1.58825	-1.60721
181	C1	BC011321	Ddx27	GENE721X	0.022952	-0.808142	-0.800319	-1.13122	-1.66805
182	C1	BC011390	Ascc3l1	GENE185X	0.01363	-1.131	-1.07316	-1.6621	-1.92959
183	C1	BC011472	Kdelr3	GENE502X	0.093056	-1.86422	-1.32882	-1.74474	-1.45899
184	C1	BC012407	Aldh7a1	GENE722X	0.023651	-0.972115	-1.08287	-1.34424	-1.47237
185	C1	BC013244	Scyl1bp1	GENE325X	0.089105	-1.55805	-0.756167	-1.19873	-1.31886
186	C1	BC014818	Ndufv1	GENE723X	0.025137	-0.857675	-0.761123	-1.60128	-2.1391
187	C1	BF141398	Abcd1	GENE725X	0.021833	-0.716235	-0.84602	-1.60092	-1.96806
188	C1	BF164689	Tcirg1	GENE727X	0.530045	0.273467	-0.0805156	-1.22996	-1.99084
189	C1	BF540497	Jund	GENE728X	0.033784	-0.895983	-0.443763	-1.2284	-1.95383
190	C1	D17546	Col18a1	GENE729X	0.014328	-1.06403	-0.895528	-1.3978	-1.928
191	C1	D50387	Gm1068	GENE730X	0.016748	-1.18793	-1.14378	-1.4841	-1.5927
192	C1	D88447	Ubxn8	GENE503X	0.022283	-1.41393	-1.14013	-1.55563	-1.54525
193	C1	J04610	Gm1418	GENE731X	0.04034	-0.859124	-1.24652	-1.18607	-1.50329
194	C1	L02346	Igh-6	GENE732X	0.050269	-0.967203	-0.605763	-1.56928	-2.35189
195	C1	M18342	N/A	GENE187X	0.025618	-1.41958	-1.1353	-1.60665	-2.31649
196	C1	M18620	Klk2-ps	GENE733X	0.028986	-0.586654	-1.05881	-1.28808	-1.69559
197	C1	M24786	N/A	GENE734X	0.060297	-0.707119	-0.360848	-1.32474	-1.53324
198	C1	M29244	N/A	GENE735X	0.023432	-1.28431	-0.907496	-1.13378	-1.79765
199	C1	M31445	N/A	GENE505X	0.023356	-1.36549	-1.14499	-1.93789	-1.77829
200	C1	M32070	Rarg	GENE736X	0.036578	-0.462045	-0.626622	-1.15976	-1.8283
201	C1	M36752	Igk-V8	GENE737X	0.018823	-1.13464	-1.20486	-1.23201	-1.90993
202	C1	M57960	Es1	GENE738X	0.037172	-0.75397	-0.457965	-1.31339	-1.6239
203	C1	M93663	N/A	GENE739X	0.024477	-0.769389	-1.20265	-1.5856	-2.03843
204	C1	NM_007396	Acvr2	GENE506X	0.195201	-0.623675	-1.46658	-1.62512	-1.3015
205	C1	NM_007414	Adprh	GENE189X	0.019472	-1.44188	-1.14702	-1.78734	-1.74269
206	C1	NM_007511	Atp7b	GENE507X	0.042207	-1.37318	-1.22937	-1.77603	-1.37749
207	C1	NM_007643	Cd36	GENE740X	0.116409	-1.15043	-0.330704	-0.895981	-1.64716
208	C1	NM_007677	Psg17	GENE326X	0.409012	-1.53272	-0.372955	-0.757609	-1.13843
209	C1	NM_007814	Cyp2b19	GENE741X	0.026904	-1.26455	-1.51908	-1.3849	-1.88046
210	C1	NM_007948	Ercc1	GENE190X	0.167669	-0.388081	-1.06299	-1.93805	-1.7242
211	C1	NM_007970	Ezh1	GENE742X	0.01832	-1.44127	-1.31055	-1.4553	-1.8774
212	C1	NM_008076	Gabrr2	GENE743X	0.081187	-0.491069	-0.469164	-0.823221	-1.75836
213	C1	NM_008105	Gcnt2	GENE744X	0.064644	-0.56134	-0.227571	-1.14689	-1.82392
214	C1	NM_008223	Serpind1	GENE745X	0.016064	-0.991655	-0.849451	-1.54927	-2.00684
215	C1	NM_008330	Ifi47	GENE746X	0.020642	-0.855596	-0.770451	-1.15475	-1.75623
216	C1	NM_008366	Il2	GENE747X	0.013358	-1.17486	-1.0835	-1.55455	-1.98287
217	C1	NM_008453	Klf3	GENE748X	0.026197	-0.973301	-0.603562	-1.15292	-1.88429
218	C1	NM_008610	Mmp2	GENE508X	0.025536	-1.50304	-1.4105	-1.75693	-2.27278
219	C1	NM_008667	Nab1	GENE749X	0.075379	-0.952565	-0.375208	-1.0971	-2.15796
220	C1	NM_008792	Pcsk2	GENE750X	0.759588	-0.716992	-0.18935	-0.310076	-1.72257
221	C1	NM_008876	Pld2	GENE751X	0.03282	-0.462675	-0.775009	-1.26639	-1.77542
222	C1	NM_008878	Serpinf2	GENE327X	1.0	-1.73711	-0.396032	0.0989354	-0.15254
223	C1	NM_008899	Pou3f2	GENE752X	0.087305	-0.715349	-0.26978	-1.28234	-2.29853
224	C1	NM_008975	Ptp4a3	GENE753X	0.02599	-0.62386	-0.784517	-1.55045	-1.98142
225	C1	NM_009071	Rock1	GENE754X	0.024195	-0.929097	-0.734992	-1.12395	-1.66391
226	C1	NM_009177	St3gal1	GENE755X	0.082085	-1.0846	-0.678597	-1.05087	-2.24938
227	C1	NM_009353	Terf2	GENE756X	0.028259	-0.976152	-1.44693	-1.67569	-2.07602
228	C1	NM_009429	Tpt1	GENE757X	0.028919	-1.5593	-1.29516	-1.29331	-1.91197
229	C1	NM_009495	Vmn2r-ps160	GENE195X	0.019347	-0.868287	-1.06045	-1.58507	-1.60446
230	C1	NM_009515	Was	GENE509X	0.015486	-1.08281	-1.27136	-1.66613	-1.96349
231	C1	NM_009571	Zfy2	GENE758X	0.023906	-1.57328	-1.31247	-1.44776	-1.98187
232	C1	NM_009579	Slc30a1	GENE759X	0.016928	-0.791552	-1.06928	-1.46097	-1.82828
233	C1	NM_009738	Bche	GENE760X	0.049194	-1.08246	-1.58779	-1.46681	-2.16922
234	C1	NM_009840	Cct8	GENE761X	0.048066	-1.10593	-0.417531	-1.37921	-1.69735
235	C1	NM_009980	Ctbp2	GENE762X	0.016753	-1.32906	-1.3457	-1.47377	-1.8641
236	C1	NM_010323	Gnrhr	GENE765X	0.023394	-0.929247	-0.595289	-1.53925	-1.90124
237	C1	NM_010329	Pdpn	GENE510X	0.038245	-0.977588	-1.54425	-1.69577	-1.7168
238	C1	NM_010353	Gsg2	GENE766X	0.019018	-1.34004	-1.22576	-1.70382	-1.64203
239	C1	NM_010401	Hal	GENE196X	0.022523	-1.12066	-1.21925	-1.92418	-2.06384
240	C1	NM_010582	Itih2	GENE767X	0.039713	-0.601069	-1.10892	-1.33392	-2.07067
241	C1	NM_010649	Klra4	GENE511X	0.113503	-0.453567	-0.876643	-1.9248	-1.87007
242	C1	NM_010935	Npy6r	GENE768X	0.327045	-1.153	-0.854536	-0.41673	-1.77289
243	C1	NM_011080	Phxr1	GENE769X	0.026086	-1.23174	-1.1269	-1.33985	-2.23367
244	C1	NM_011203	Ptpn12	GENE770X	0.039956	-0.864608	-1.34313	-1.21894	-1.6111
245	C1	NM_011372	St6galnac3	GENE771X	0.049766	-0.633387	-0.473168	-1.42197	-2.18446
246	C1	NM_011475	Sprr2i	GENE328X	0.717817	-1.63485	-0.625781	-0.574959	-0.568751
247	C1	NM_011863	Papss1	GENE512X	0.070032	-0.600716	-1.12476	-1.60729	-1.37453
248	C1	NM_012034	Tpsg1	GENE513X	0.038965	-0.636104	-0.930967	-1.57131	-1.4552
249	C1	NM_013509	Eno2	GENE772X	0.021479	-1.06083	-0.790676	-1.36723	-1.53447
250	C1	NM_013671	Sod2	GENE773X	0.10015	-0.169432	-0.462272	-1.15312	-1.81928
251	C1	NM_013770	Slc25a10	GENE199X	0.115714	-0.875499	-0.585507	-1.61384	-2.55981
252	C1	NM_013778	Akr1c13	GENE774X	0.014026	-1.08782	-1.16845	-1.53874	-1.99261
253	C1	NM_013810	Dbnl	GENE775X	0.0295	-1.50053	-1.20205	-1.25274	-1.60534
254	C1	NM_013926	Cbx8	GENE515X	0.67661	0.163129	-0.966287	-1.78643	-1.59223
255	C1	NM_016685	Comp	GENE200X	0.014236	-1.10877	-0.948749	-1.6102	-1.74278
256	C1	NM_016739	Caprin1	GENE201X	0.078629	-1.06457	-1.46302	-1.99512	-2.48479
257	C1	NM_016748	Ctps	GENE202X	0.01638	-1.29112	-1.36691	-1.73058	-1.89807
258	C1	NM_018759	Zfp326	GENE776X	0.021751	-1.02467	-1.34135	-1.32825	-1.94091
259	C1	NM_018883	Camkk1	GENE777X	0.03869	-1.53734	-0.804132	-1.35575	-1.97599
260	C1	NM_019420	B3galt4	GENE778X	0.019549	-0.922056	-0.924027	-1.21529	-1.6213
261	C1	NM_019441	Ppt2	GENE779X	0.030047	-0.771157	-0.603457	-1.20332	-1.57012
262	C1	NM_019667	Stam2	GENE780X	0.139631	-0.342912	-0.281581	-1.42981	-2.13157
263	C1	NM_019692	Rit2	GENE329X	0.180745	-1.65998	-0.757917	-0.796	-1.0688
264	C1	NM_020000	Med8	GENE204X	0.016209	-1.01388	-0.933728	-1.7105	-1.95441
265	C1	NM_021293	Cd33	GENE782X	0.041384	-1.27048	-0.813598	-0.951076	-1.68125
266	C1	NM_023557	Slc44a4	GENE784X	0.092453	-0.610153	-0.632509	-1.12768	-2.30725
267	C1	NM_024194	Lrrc40	GENE785X	0.392266	-0.820469	-1.01862	-0.514906	-1.53932
268	C1	NM_025278	Gng12	GENE786X	0.028712	-1.3626	-0.748601	-1.28386	-1.93253
269	C1	NM_025706	Tbc1d15	GENE787X	0.015873	-1.20613	-1.12942	-1.28948	-1.74031
270	C1	NM_025827	Lonp2	GENE788X	0.0278	-1.14348	-0.763532	-1.07593	-1.7151
271	C1	NM_025834	Proz	GENE230X	0.041621	-1.28371	-1.64429	-1.63876	-1.6715
272	C1	NM_025934	Riok2	GENE516X	0.150428	-0.944713	-1.25295	-1.92708	-1.19582
273	C1	NM_026080	Mrps24	GENE789X	0.014579	-1.29037	-1.08651	-1.69696	-1.84167
274	C1	NM_026275	Ube2r2	GENE790X	0.019038	-1.15072	-1.01679	-1.36287	-2.12578
275	C1	NM_026330	Nsmce1	GENE791X	0.033671	-0.682751	-0.733294	-1.0062	-1.67517
276	C1	NM_026670	Zmym1	GENE205X	0.021976	-0.802981	-0.802993	-1.68606	-1.91526
277	C1	NM_026819	Dhrs1	GENE792X	0.042482	-0.733558	-0.474905	-1.16653	-2.082
278	C1	NM_029231	Pelp1	GENE206X	0.023402	-0.986365	-1.08994	-1.75607	-2.22288
279	C1	NM_031368	Bglap-rs1	GENE517X	0.163096	-0.918879	-1.19283	-1.59493	-0.993834
280	C1	NM_031387	Tdrd1	GENE793X	0.024882	-0.779218	-1.08045	-1.607	-1.56464
281	C1	S81393	Aga	GENE794X	0.038073	-0.939146	-1.09552	-1.05841	-1.48899
282	C1	U06662	Ofa	GENE795X	0.017045	-1.04565	-0.950943	-1.27035	-1.99586
283	C1	U22982	Gm1499	GENE796X	0.017849	-1.23646	-1.30932	-1.57105	-1.64936
284	C1	U26790	LOC633760	GENE518X	0.028046	-1.14352	-0.779814	-1.73811	-1.63042
285	C1	U29508	Zfp72 (Zfp74)	GENE797X	0.29032	0.0223141	-0.265828	-0.753904	-1.84209
286	C1	U29511	Zfp78 (ZNF135)	GENE519X	0.027177	-1.3536	-1.02465	-1.4781	-1.44816
287	C1	U55583	Igk-V34	GENE798X	0.013881	-1.13125	-1.09408	-1.41344	-1.9725
288	C1	U69898	Timm44	GENE208X	0.054347	-0.877433	-0.571277	-1.78765	-2.19234
289	C1	U95030	Alcam	GENE799X	0.162856	-1.36437	-1.5691	-0.911071	-1.92881
290	C1	U96701	Spi15	GENE209X	0.016429	-0.933779	-0.913331	-1.59368	-2.01774
291	C1	X03766	Acta1	GENE800X	0.028437	-1.07035	-0.831151	-1.27671	-2.18861
292	C1	X51742	N/A	GENE802X	0.018215	-1.08719	-1.20427	-1.48156	-2.14537
293	C1	X56574	Rarb	GENE520X	0.089695	-0.273385	-0.593489	-1.5537	-1.73117
294	C1	X57277	Rac1	GENE803X	0.147108	-0.253974	-0.235245	-1.07911	-1.53245
295	C1	X66664	N/A	GENE211X	0.018729	-1.02754	-0.840146	-1.73293	-1.91949
296	C1	X81633	Spag5	GENE804X	0.057063	-0.452402	-0.667249	-0.968	-1.64038
297	C1	X81718	Tmem97	GENE805X	0.288091	0.174734	-0.151823	-1.02923	-1.73236
298	C1	Z16406	Meox2	GENE806X	0.091305	-1.53625	-1.56703	-1.09112	-1.82337
299	C1	Z83814	Dnahc6	GENE330X	0.102096	-1.55837	-0.817611	-1.09661	-1.22691
-	C1	Average profile				-1.07111	-0.975448	-1.39258	-1.79475
	C1	Trajectory profile				1	1	1	0

## Sheet: Table S4-C2
Number	Flag	Gene		Eweight	Gweight	Developmental stage
		NCBI ID	Official Symbol			P5	P14	L1	L12
1	C2	AB001737	Igk-V8	GENE54X	0.118522	2.2449	2.35368	1.74241	1.31189
2	C2	AB030201	Tmem205	GENE55X	0.177053	2.75691	2.43701	1.85001	1.65278
3	C2	AB063319	Rian (not protein)	GENE72X	0.220649	1.23779	2.21094	2.29884	1.61904
4	C2	AF041943	N/A	GENE231X	0.065882	1.76222	1.31545	1.32763	1.5528
5	C2	AF041944	N/A	GENE522X	0.080876	1.8284	1.73343	1.58651	1.92731
6	C2	AF041973	N/A	GENE331X	0.157909	1.93145	2.40241	1.76981	2.15904
7	C2	AF050425	N/A	GENE212X	0.059075	1.55848	1.87435	1.94366	1.6824
8	C2	AF068182	Blnk	GENE332X	0.222784	1.7912	2.7898	2.369	1.67035
9	C2	AF073933	N/A	GENE0X	0.091076	1.7981	2.17504	2.22133	1.87189
10	C2	AF081116	Taf1	GENE243X	0.374354	2.59868	3.10396	1.33763	-0.0431306
11	C2	AF093549	Igh-6	GENE333X	0.322703	0.940292	1.66546	1.29748	1.08908
12	C2	AF124383	Gnas	GENE244X	0.814353	3.27908	0.801093	0.0767664	0.207025
13	C2	AF144975	Igh-VJ558	GENE526X	0.074999	1.8239	1.32719	1.31141	1.71212
14	C2	AF217002	Tpcn1	GENE245X	0.061832	1.90273	1.8141	1.70706	1.23229
15	C2	AF261233	Slc24a6	GENE334X	1.0	1.10867	1.70655	0.203278	0.158972
16	C2	AF263365	Rab3d	GENE335X	0.055554	1.63256	1.97063	1.55726	1.5611
17	C2	AF276872	Slc5a7	GENE246X	0.139415	2.38568	1.92958	1.71033	2.01946
18	C2	AF283284	N/A	GENE247X	0.180995	1.77724	1.19101	0.965667	0.601724
19	C2	AF287260	Creb3l4	GENE248X	0.051857	1.61141	1.49827	1.64128	1.46645
20	C2	AF330197	Rnf111	GENE56X	0.41043	2.70709	3.1048	1.26596	-0.0466819
21	C2	AF351196	Dscaml1	GENE531X	0.132086	1.78166	1.83022	1.20248	1.87525
22	C2	AF357361	Rnu11 (Not protein)	GENE57X	1.0	3.09019	3.24584	1.51607	1.32975
23	C2	AJ007954	N/A	GENE532X	0.046928	1.85094	1.89407	1.73174	1.51038
24	C2	AJ272163	Esr1	GENE249X	0.162141	2.26515	1.24296	1.58828	1.50314
25	C2	AJ278735	Cabc1	GENE533X	0.101344	1.09002	1.53282	1.85118	1.73805
26	C2	AJ293625	1810035L17Rik (Slirp)	GENE250X	0.165527	1.74583	0.456407	0.601072	1.11498
27	C2	AK002408	Crls1	GENE336X	0.540186	1.50463	2.52681	0.824009	1.61417
28	C2	AK002995	0710005I21Rik	GENE8X	1.0	2.27091	3.03572	2.836	1.30459
29	C2	AK003042	Oxt	GENE251X	0.097639	1.68111	1.02169	1.29979	1.5142
30	C2	AK003649	Agpat5	GENE252X	0.123671	2.68412	2.07126	1.94895	1.73823
31	C2	AK004394	Lrrn4cl	GENE253X	0.177663	2.07855	1.01683	0.75498	0.874093
32	C2	AK004855	1300002K09Rik	GENE74X	0.711539	2.03355	2.62211	2.22763	0.679811
33	C2	AK004878	Coasy	GENE58X	0.149292	2.47376	1.73068	1.49096	1.44411
34	C2	AK004982	Klhl5	GENE9X	0.138771	2.66263	2.36276	2.27032	1.86183
35	C2	AK005119	1500002J14Rik	GENE539X	0.089067	2.30775	2.03337	1.76883	1.87179
36	C2	AK005727	1700007J24Rik	GENE254X	0.065583	2.2608	1.79519	1.75056	1.56545
37	C2	AK005876	1700011L22Rik	GENE541X	0.192865	1.27156	1.26549	1.35759	1.80638
38	C2	AK005902	Wdr68	GENE59X	0.994994	2.21096	2.34146	0.363762	-0.136312
39	C2	AK006484	Metap1	GENE255X	1.0	2.16965	0.511208	0.681982	0.482242
40	C2	AK006553	1700030J22Rik	GENE232X	0.095747	2.15204	1.5232	1.37247	1.806
41	C2	AK006642	1700039I01Rik	GENE60X	0.849764	2.10796	2.97091	1.87726	1.08506
42	C2	AK006942	1700072O05Rik	GENE394X	0.109735	1.28935	1.53739	2.04772	1.9463
43	C2	AK007086	Tbc1d21	GENE256X	0.108102	2.00781	0.999176	1.04014	0.932149
44	C2	AK007255	1700123M08Rik	GENE398X	0.09874	1.36289	1.45396	1.7263	1.21121
45	C2	AK007391	Ubr4	GENE22X	0.208785	1.77309	1.81575	2.1634	2.33819
46	C2	AK007484	Atg7	GENE257X	0.322108	2.1142	0.500641	0.944186	1.32108
47	C2	AK007903	1810059C17Rik	GENE45X	0.179307	2.72851	2.05052	2.21915	1.90069
48	C2	AK007969	1810073G21Rik	GENE61X	0.103063	1.8891	1.71626	1.02834	1.42703
49	C2	AK008023	Prss32	GENE258X	0.070425	2.19344	1.64847	1.41528	1.59886
50	C2	AK008176	Myo1a	GENE76X	0.133387	1.1515	2.02782	2.02482	1.40747
51	C2	AK008384	2010110K18Rik	GENE259X	0.097629	1.80472	0.835765	0.971179	1.14495
52	C2	AK008577	2010317E24Rik	GENE260X	0.240161	1.52689	2.22497	1.51233	0.926782
53	C2	AK008761	Tspan17	GENE261X	0.255742	1.97163	1.94975	1.69601	0.705495
54	C2	AK009420	Rnf113a2	GENE213X	0.484754	1.94228	1.92637	2.11968	0.662735
55	C2	AK009575	Bdh	GENE338X	0.335904	1.50673	1.64132	0.961097	0.948616
56	C2	AK009722	2310040G07Rik	GENE62X	0.086224	1.86359	1.5726	1.76273	1.07997
57	C2	AK009865	Dzip3	GENE63X	0.329596	2.01445	2.28099	2.1023	1.00447
58	C2	AK010752	2410091C18Rik (Protein midA homolog, mitochondrial)	GENE262X	0.164051	1.69099	0.58204	0.547166	1.1181
59	C2	AK010766	Mtif2	GENE339X	0.082333	1.90906	1.94676	1.40924	1.16129
60	C2	AK010940	2510009E07Rik (UPF0524 protein C3orf70)	GENE263X	0.597819	2.40916	1.587	0.732199	0.592308
61	C2	AK011694	Zfp820	GENE340X	0.31214	1.1136	1.75212	1.56935	0.775153
62	C2	AK011937	2610209M04Rik (U4/U6.U5 tri-snRNP-associated protein 3)	GENE10X	0.171898	2.0557	2.61034	2.24115	1.57545
63	C2	AK012143	Mrpl55	GENE341X	0.270323	1.56277	2.24287	1.06388	1.80504
64	C2	AK012317	Snapc1	GENE401X	0.188414	1.14361	1.91074	2.2937	1.45816
65	C2	AK013108	Flywch2	GENE264X	0.101769	2.05141	1.57944	1.61768	1.02856
66	C2	AK013325	Fance	GENE265X	0.333787	2.19659	1.36962	0.925856	0.561372
67	C2	AK013617	2900035J10Rik	GENE78X	0.06606	1.30876	1.63657	1.75339	1.47475
68	C2	AK013809	2900082C11Rik	GENE266X	0.228347	2.95999	2.35866	1.83874	1.64828
69	C2	AK014386	Akap5	GENE79X	0.317206	2.42274	2.69281	2.89786	1.9472
70	C2	AK014665	Ppih	GENE114X	0.10891	1.62538	1.72895	2.16299	2.05914
71	C2	AK015470	4930455J16Rik	GENE267X	0.096647	1.93797	1.05334	1.09767	0.951485
72	C2	AK015568	4930473O22Rik	GENE268X	0.064751	1.84953	2.08355	1.89285	1.46349
73	C2	AK015610	4930482G09Rik	GENE214X	0.151466	2.55317	2.24227	2.24035	1.61032
74	C2	AK015616	4930483K19Rik	GENE269X	0.087967	1.97382	1.33151	1.05345	1.25852
75	C2	AK015631	4930486G11Rik (UPF0623 protein)	GENE553X	0.149504	1.59596	1.19669	1.8651	1.67417
76	C2	AK015837	4930519B02Rik (Fam164b (C6orf94))	GENE408X	0.254067	1.71592	2.5266	2.63317	1.5967
77	C2	AK015855	4930520O04Rik	GENE64X	0.133226	2.26302	2.56523	2.11806	2.00022
78	C2	AK016052	4930546H06Rik (Uncharacterized protein ENSP00000365934 homolog)	GENE233X	0.117192	2.3365	1.95711	1.40482	1.56973
79	C2	AK016953	Cage1	GENE555X	0.134051	1.64243	1.45341	2.03718	1.96851
80	C2	AK017152	Slain2	GENE12X	0.173216	2.32408	2.76832	2.56105	1.87634
81	C2	AK017526	Slc35d2	GENE270X	1.0	2.00377	1.23098	0.590969	-0.0827976
82	C2	AK017652	Zfp292	GENE271X	0.697053	1.66044	1.4968	1.65088	0.342969
83	C2	AK017966	5830433G22Rik	GENE272X	0.060043	1.94319	1.63733	1.88076	1.51586
84	C2	AK018341	B230217C12Rik	GENE343X	1.0	1.56987	2.42826	0.632649	-0.602215
85	C2	AK019055	Tulp4	GENE414X	0.253415	1.08854	1.28432	2.20471	1.47501
86	C2	AK019652	4930482J15Rik	GENE273X	0.3063	2.08925	1.37042	1.60638	0.725905
87	C2	AK019721	4930535L15Rik	GENE274X	0.073779	1.76712	1.37982	1.23849	1.66464
88	C2	AK019729	4930540M03Rik	GENE416X	0.161253	1.55928	1.55395	1.73555	0.849934
89	C2	AK019807	Tmem190	GENE28X	0.121467	1.74428	2.31706	2.15885	2.07569
90	C2	AK020238	8430439B09Rik	GENE344X	0.296054	1.70413	2.25243	1.69838	0.603323
91	C2	AK020382	9330169L03Rik	GENE345X	0.104602	1.22551	1.80453	1.4247	1.3589
92	C2	AK020389	Tmhs	GENE275X	0.057114	1.85006	1.85675	1.93935	1.77972
93	C2	AK020861	A930015G24Rik	GENE346X	0.740311	0.944613	2.48913	1.81861	1.26693
94	C2	AK020990	B230206I08Rik	GENE276X	1.0	3.79213	2.05357	1.37625	0.575906
95	C2	AK021065	C030011I16Rik	GENE347X	0.066814	1.94756	1.65348	1.21705	1.34234
96	C2	AK021366	E130102B10Rik	GENE277X	0.10477	2.3862	2.00797	2.0807	1.67267
97	C2	AK027261	2700018L05Rik	GENE13X	0.110303	2.31552	2.21499	1.66659	1.28272
98	C2	AY005469	Sult1c1	GENE278X	0.474132	2.52669	2.54639	1.3981	-0.0521483
99	C2	BC003483	Mtss1	GENE279X	0.06081	2.0932	1.90064	1.52625	1.34757
100	C2	BC003937	Epb4.1l5	GENE224X	0.062084	1.43262	1.94574	1.75793	1.68261
101	C2	BC003984	Triobp	GENE564X	0.089713	1.75188	1.69113	2.09647	1.83802
102	C2	BC006661	Dbr1	GENE421X	0.15962	1.82926	2.2479	2.491	1.91455
103	C2	BC006909	Prr14	GENE34X	0.208697	1.06602	1.94613	2.30017	1.93398
104	C2	BC007193	C130026I21Rik	GENE280X	0.056755	1.99819	1.44438	1.60875	1.42416
105	C2	BC009092	3300001P08Rik (Crop)	GENE215X	0.068934	2.06233	1.91977	1.77438	1.27851
106	C2	BC009156	Arhgef18	GENE281X	0.09073	2.04225	1.12468	1.23019	1.37374
107	C2	D29939	Igk-V	GENE425X	0.113517	1.30053	1.97936	2.21718	1.67404
108	C2	L14949	Trsp (not protein)	GENE282X	0.814353	3.31213	0.846449	0.502442	0.559819
109	C2	L16948	Hk1	GENE283X	0.119521	1.57974	0.984852	1.11611	0.948279
110	C2	L17334	Ggt1	GENE4X	0.087756	1.96156	2.38516	2.17975	1.86151
111	C2	L17335	Ggt1	GENE348X	0.106736	1.19549	1.7309	1.45188	1.68348
112	C2	M10336	Rnu5g	GENE65X	1.0	3.13357	3.90858	1.63874	0.991951
113	C2	M18091	N/A	GENE349X	0.524498	2.44394	2.38811	0.938753	-0.240793
114	C2	M73551	N/A	GENE131X	0.198018	0.994717	1.34859	2.03597	2.21564
115	C2	NM_007512	Atpif1	GENE14X	0.092741	2.32028	2.13527	2.10675	1.94261
116	C2	NM_007614	Ctnnb1	GENE350X	0.059077	1.60998	1.9533	1.87174	1.77816
117	C2	NM_007761	Crcp	GENE574X	0.111642	1.51918	1.25399	1.32952	1.70953
118	C2	NM_007763	Crip1	GENE15X	0.07341	2.14223	1.9805	2.00902	1.58304
119	C2	NM_007786	Csn3	GENE437X	0.082935	1.12701	1.64759	1.93602	1.53813
120	C2	NM_007855	Twist2	GENE284X	0.278337	1.59131	0.77414	0.439781	0.786432
121	C2	NM_007898	Doc2b	GENE234X	1.0	2.27704	0.0916255	1.60381	1.97249
122	C2	NM_007949	Ercc2	GENE66X	0.06358	2.11755	2.15348	1.75853	1.60067
123	C2	NM_007962	Mpzl2	GENE285X	0.077382	1.80905	1.16966	1.04774	1.20732
124	C2	NM_008107	Gdf1	GENE216X	0.080894	2.17964	1.57106	1.7053	1.73693
125	C2	NM_008184	Gstm6 (Gstm5)	GENE286X	0.110648	1.69575	1.04078	1.57419	1.34394
126	C2	NM_008192	Gucy2e	GENE287X	0.085962	1.64865	1.53369	1.62926	1.06029
127	C2	NM_008374	Il9r	GENE288X	0.185429	2.81288	2.40936	2.01436	1.5711
128	C2	NM_008423	Kcnd1	GENE289X	0.644414	3.2214	1.95583	1.75877	1.69927
129	C2	NM_008521	Ltc4s	GENE351X	0.177205	1.42385	2.33901	1.58363	1.81787
130	C2	NM_008555	Masp1	GENE290X	0.10136	1.61699	1.07886	1.03864	1.03834
131	C2	NM_008635	Mtap7	GENE291X	0.07229	1.4844	1.36469	1.6958	1.4302
132	C2	NM_008710	Nnt	GENE46X	0.379013	2.30176	1.33676	2.05541	1.59833
133	C2	NM_008713	Nos3	GENE226X	0.086917	1.62563	2.22891	1.7173	1.87943
134	C2	NM_008748	Dusp8	GENE292X	0.086509	1.9067	1.57704	1.09825	1.61908
135	C2	NM_008796	Pctp	GENE440X	0.172703	2.50648	1.6587	1.55775	1.81808
136	C2	NM_009043	Reg2	GENE442X	0.076962	1.41306	1.53612	1.86683	1.35154
137	C2	NM_009100	Rptn	GENE137X	0.292268	1.09407	1.74549	2.22491	2.3735
138	C2	NM_009154	Sema5a	GENE85X	0.318407	1.90561	2.42335	1.6202	2.27863
139	C2	NM_009344	Phlda1	GENE579X	0.07175	1.55606	1.71898	1.86476	1.94473
140	C2	NM_009496	Vamp1	GENE67X	0.253031	1.68354	2.56788	1.65557	1.44359
141	C2	NM_009720	Atox1	GENE444X	0.073291	1.36375	1.99843	1.82267	1.73041
142	C2	NM_009788	Calb1	GENE352X	0.144829	1.69075	2.40382	2.46102	1.77423
143	C2	NM_009914	Ccr3	GENE293X	0.147338	1.80081	0.66225	1.16968	1.13378
144	C2	NM_010157	Esr2	GENE217X	0.055377	1.85397	1.66226	1.77124	1.31086
145	C2	NM_010232	Fmo5	GENE294X	0.172997	1.91735	0.513943	0.599797	1.20838
146	C2	NM_010423	Hey1	GENE353X	0.120859	1.7754	1.91768	1.07885	1.41498
147	C2	NM_010430	Hic1	GENE354X	0.360391	2.52187	2.85612	2.00965	1.61193
148	C2	NM_010726	Phyh	GENE47X	0.125092	2.09818	2.08701	2.33107	1.89362
149	C2	NM_010769	Matn1	GENE295X	0.093347	1.7409	1.16405	0.965765	0.969943
150	C2	NM_010798	Mif	GENE69X	0.119943	2.09818	2.46077	1.76644	1.32309
151	C2	NM_011069	Pex11b	GENE581X	0.199768	0.764251	1.7131	1.3391	1.5831
152	C2	NM_011624	Top3b	GENE70X	0.568371	2.1574	2.66086	1.00302	-0.224691
153	C2	NM_011648	Tshr	GENE296X	0.057748	1.60064	2.01547	1.63964	1.55449
154	C2	NM_011856	Odz2	GENE297X	0.514381	2.80439	2.20554	1.37389	1.45227
155	C2	NM_011922	Anxa10	GENE298X	0.216103	1.73233	0.520558	0.280719	0.930516
156	C2	NM_013458	Add2	GENE448X	0.074286	1.98366	2.29621	1.6933	1.58581
157	C2	NM_013506	Eif4a2	GENE299X	0.161035	2.13556	2.51345	1.53304	1.37928
158	C2	NM_013557	Eif2ak1	GENE355X	0.125656	2.24543	2.50111	1.69783	1.69899
159	C2	NM_013754	Insl6	GENE92X	0.239498	1.31208	2.12606	1.73585	1.00596
160	C2	NM_013798	Actg1	GENE356X	0.151948	1.85294	2.60063	2.16327	1.643
161	C2	NM_016673	Cntfr	GENE300X	0.685915	2.70694	1.49186	1.4687	1.12017
162	C2	NM_016722	Galns	GENE301X	0.252128	1.76145	0.239741	0.554182	1.03767
163	C2	NM_016801	Stx1a	GENE452X	0.104459	1.15843	1.4591	1.85918	1.34589
164	C2	NM_019439	Gabbr1	GENE357X	0.429768	1.55377	2.72104	1.62321	0.784966
165	C2	NM_019454	Dll4	GENE358X	0.05508	1.85039	1.49041	1.3083	1.47013
166	C2	NM_019513	Car5b	GENE302X	0.257225	2.00058	0.671951	0.482962	1.34264
167	C2	NM_019579	Mpp5	GENE303X	0.246295	1.64008	0.807003	0.628654	0.666601
168	C2	NM_019693	Bat1a	GENE304X	0.12245	1.56644	1.03787	1.33244	1.05569
169	C2	NM_019728	Defb4	GENE359X	0.0955	1.3853	1.92338	1.35418	1.62641
170	C2	NM_019946	Mgst1	GENE453X	0.187094	0.753492	1.63362	1.80935	1.60222
171	C2	NM_019956	Krt71	GENE360X	0.236378	0.827145	1.80643	1.19048	1.56809
172	C2	NM_019965	Dnajb12	GENE586X	0.066833	1.97117	1.89917	1.82591	1.94636
173	C2	NM_020005	Pcaf	GENE454X	0.06072	1.50814	1.94733	1.76611	1.41778
174	C2	NM_020026	B3galnt1	GENE455X	0.053021	1.79663	1.69798	1.55044	1.75345
175	C2	NM_021327	Tnip1	GENE227X	0.053294	1.66754	1.70913	1.85891	1.67825
176	C2	NM_021386	Cldn10	GENE305X	0.128548	1.61463	0.849437	1.05165	0.84129
177	C2	NM_025594	Zmat2	GENE306X	0.058585	1.96938	1.44081	1.48062	1.59629
178	C2	NM_025605	2400001E08Rik	GENE307X	0.154186	1.79458	0.904527	1.22876	1.65052
179	C2	NM_025987	Ndufa6	GENE308X	0.108483	1.6449	0.970931	1.44473	1.4466
180	C2	NM_026310	Mrpl18	GENE361X	0.225551	2.0581	2.20876	1.31998	1.0872
181	C2	NM_026522	Chid1	GENE147X	0.13504	1.36155	1.96658	2.05849	2.14281
182	C2	NM_028120	Ccdc123	GENE362X	0.136263	1.44153	2.13172	1.46331	1.25532
183	C2	NM_028146	Dbndd1	GENE363X	0.180537	1.66204	1.68076	1.05874	0.956171
184	C2	NM_029392	N/A	GENE71X	0.445583	2.68819	2.90382	1.71016	0.0460283
185	C2	S58460	N/A	GENE364X	0.195642	1.07848	1.83088	1.29011	1.69777
186	C2	S74697	Span (Ms4a6d)	GENE596X	0.143102	1.13136	1.51768	1.94719	1.98844
187	C2	U05672	Adora2a	GENE365X	0.502388	1.41795	2.38585	1.70347	0.388729
188	C2	U16179	Igh-6	GENE366X	0.065468	2.16941	2.20672	1.87518	1.71152
189	C2	U51457	Igh-VS107	GENE367X	0.228721	1.25625	1.73006	1.45796	0.809073
190	C2	U55455	Igh-6	GENE309X	0.099552	1.61697	1.26282	1.83738	1.31946
191	C2	U55540	Igh-6	GENE310X	0.157652	1.93352	1.42169	0.788779	1.04266
192	C2	U69541	Igh-6	GENE43X	0.12841	1.80815	2.44104	1.81142	2.01004
193	C2	U89415	Eef2	GENE368X	0.075549	1.56896	1.86736	1.34262	1.39013
194	C2	U89889	Hpx	GENE96X	0.161964	1.07194	1.75907	2.17794	1.36052
195	C2	U89924	Ppp1r3c	GENE44X	0.313958	2.7991	2.79215	2.26043	1.9208
196	C2	U94423	Mef2a	GENE311X	0.101226	1.96689	1.46607	1.3516	0.995131
197	C2	U95921	Tcra	GENE218X	0.087636	2.29424	2.28815	1.7994	1.83305
198	C2	X04211	N/A	GENE597X	0.440341	1.01493	1.49507	1.86065	2.54251
199	C2	X56029	Rnu3a	GENE369X	0.683718	1.52512	3.13492	1.73001	0.607656
200	C2	X65704	Snrpe	GENE370X	0.053821	1.86691	1.90345	1.42078	1.56166
201	C2	X76290	Shh	GENE228X	0.108641	2.01689	2.01024	1.98783	2.15353
202	C2	X76684	Foxa1	GENE599X	0.456741	1.61676	2.36133	1.03795	2.05667
203	C2	Y10969	RGD1311093 (5430433E21Rik)	GENE600X	0.754944	2.20687	0.673557	1.30745	1.8521
204	C2	Y11896	Chic1	GENE312X	0.057022	1.87425	1.54737	1.28981	1.35931
205	C2	Z12176	Tcrb-V13	GENE313X	0.068106	1.85873	1.59859	1.77042	1.21159
206	C2	Z12430	N/A	GENE371X	0.168766	2.27657	2.87435	2.46874	1.90835
207	C2	Z22142	Igh-6	GENE601X	0.487682	1.03229	1.21368	1.10481	1.50506
208	C2	Z95478	Igk-V	GENE474X	0.255082	1.58734	1.64573	1.87969	2.38983
-	C2	Average profile				1.86297	1.80656	1.57857	1.37607
	C2	Trajectory profile				2	2	2	1

## Sheet: Table S4-C3
Number	Flag	Gene		Eweight	Gweight	Developmental stage
		NCBI ID	Official Symbol			P5	P14	L1	L12
1	C3	AB043424	N/A	GENE101X	0.338793	0.259462	0.66598	2.05303	2.19533
2	C3	AF000918	N/A	GENE521X	0.579825	0.0781566	0.163364	1.74977	1.67532
3	C3	AF059702	N/A	GENE523X	0.265085	0.36067	1.77341	1.57935	1.98163
4	C3	AF062757	N/A	GENE524X	0.321894	-0.561331	1.22022	2.22219	3.03169
5	C3	AF163744	N/A	GENE527X	0.384871	-0.398051	1.18523	1.27186	2.14456
6	C3	AF197136	BC017612 (UPF0443 protein C11orf75 (Protein FN5))	GENE528X	0.351012	-0.327195	0.171502	1.19554	1.59959
7	C3	AF224494	Zfand2a	GENE529X	0.228334	-0.524738	1.01243	1.44094	1.54362
8	C3	AF247663	Hoxa6	GENE383X	0.29096	0.689322	0.735248	1.69173	2.10352
9	C3	AF284437	Il1rapl2	GENE530X	0.439277	-1.16652	0.805347	2.06251	2.93759
10	C3	AF305211	Slc28a3	GENE384X	0.155101	0.999113	0.958698	1.84025	1.78664
11	C3	AF387322	Rbm9	GENE385X	0.858294	0.138451	1.14291	1.61231	1.30549
12	C3	AJ278073	N/A	GENE386X	0.292206	-0.639716	1.47229	2.32239	2.92954
13	C3	AK002981	Ankrd13d	GENE388X	0.948006	-1.06821	0.856368	2.28701	-0.221636
14	C3	AK003217	Txndc4	GENE389X	0.485225	-0.500184	1.19586	2.20029	0.843054
15	C3	AK003605	Hhatl	GENE534X	0.634411	-1.42316	-0.106756	1.45118	1.81052
16	C3	AK003898	Ube2v2	GENE535X	0.314805	0.452193	0.694331	0.747119	1.77364
17	C3	AK004375	Abhd13	GENE337X	1.0	0.593831	2.3657	1.3663	2.51417
18	C3	AK004522	Ndufb9	GENE536X	0.124926	-0.457156	0.489537	1.59473	2.10911
19	C3	AK004757	Stk11ip	GENE537X	0.613701	-0.894433	0.00831712	0.702195	1.88941
20	C3	AK004971	Ugt2b1	GENE538X	0.335523	-0.610519	0.860035	1.00146	1.62482
21	C3	AK005293	Phyhd1	GENE390X	0.153424	0.778919	0.862834	1.66518	1.80312
22	C3	AK005692	1700007B13Rik (Pdilt)	GENE391X	0.154978	-0.0321099	1.34815	1.94262	1.7688
23	C3	AK005702	1700007E06Rik	GENE540X	0.279778	0.329374	0.370488	1.51093	1.75308
24	C3	AK005737	N/A	GENE106X	0.130377	-0.124087	1.45914	1.9884	1.93912
25	C3	AK005813	1700010B13Rik	GENE107X	0.67925	-0.248595	0.152915	2.26956	1.89118
26	C3	AK005916	1700012J15Rik	GENE392X	0.409942	0.701989	0.550989	1.669	1.12141
27	C3	AK005994	1700015G11Rik	GENE108X	0.237933	0.316457	1.28079	1.71638	2.12935
28	C3	AK006325	1700025C18Rik	GENE542X	0.383784	-1.09471	0.950094	1.56972	2.11338
29	C3	AK006719	1700047N06Rik	GENE543X	0.457963	-0.440891	0.267369	0.582019	1.7435
30	C3	AK006833	1700058M10Rik	GENE544X	0.364148	0.262862	0.348807	1.32523	2.21418
31	C3	AK006850	1700061D14Rik	GENE393X	0.405855	-0.399774	0.770037	2.6312	2.60839
32	C3	AK006961	1700081B01Rik	GENE395X	1.0	-1.35953	0.712142	2.17766	1.97365
33	C3	AK006997	1700084M14Rik	GENE545X	0.211199	-0.388829	0.160398	1.1383	2.009
34	C3	AK007195	1700113H08Rik	GENE396X	0.190604	-0.101957	2.06571	2.22616	1.83799
35	C3	AK007248	1700123E06Rik	GENE397X	0.196574	-0.141084	1.99677	2.03147	1.86425
36	C3	AK007908	Camta1	GENE109X	0.541353	-1.14986	0.53997	2.33932	2.95206
37	C3	AK009512	2310026L22Rik	GENE399X	0.595152	-0.180358	0.895527	2.12226	-0.0970119
38	C3	AK009878	Txndc15	GENE546X	0.351873	-0.367687	0.145247	0.965557	2.42584
39	C3	AK010741	2410085M17Rik	GENE400X	0.858244	-0.919473	0.839083	2.12188	0.447457
40	C3	AK011866	2610203C22Rik	GENE547X	0.256405	-0.322895	0.785398	0.949202	1.77482
41	C3	AK012079	Atad2	GENE111X	0.473509	-0.808055	0.372385	1.74293	2.71705
42	C3	AK012980	Tbx18	GENE548X	0.179615	-0.513509	0.326383	1.40262	2.32673
43	C3	AK013819	2900084I15Rik	GENE403X	1.0	-0.142767	0.165873	2.4965	-0.213442
44	C3	AK014101	Usp42	GENE404X	0.858244	-0.935071	0.971186	1.64854	0.751087
45	C3	AK014626	Kcnk16	GENE113X	0.285155	0.212245	1.01378	2.2081	1.8839
46	C3	AK014808	4921522E24Rik	GENE405X	0.499908	-0.804167	1.29172	2.6313	-0.204996
47	C3	AK014939	Ints10	GENE406X	0.338184	0.785435	1.06373	2.17041	2.27563
48	C3	AK015066	4930403L11Rik	GENE549X	0.166882	-0.637179	0.459337	1.16798	1.9147
49	C3	AK015453	4930453J04Rik	GENE550X	0.119378	-0.618955	0.811718	1.51766	1.73957
50	C3	AK015504	2900005J15Rik	GENE551X	0.316293	0.0196001	0.580914	0.8367	1.53727
51	C3	AK015613	4930483C13Rik	GENE552X	0.713873	-0.716408	-0.424145	0.84022	1.84572
52	C3	AK015922	4930528A17Rik	GENE409X	0.843433	-1.05432	1.32075	2.25421	0.856258
53	C3	AK016678	Als2cr12	GENE554X	0.634411	-1.23355	-0.319604	1.66516	2.01656
54	C3	AK016810	4933413N12Rik	GENE410X	0.570452	-0.602994	-0.132654	1.76009	1.39482
55	C3	AK017247	Zfp710	GENE411X	0.121728	0.926083	1.29977	1.68909	1.82234
56	C3	AK017442	Krtap2-4	GENE557X	1.0	-1.04762	1.49978	1.2129	2.48386
57	C3	AK017448	Wrb	GENE558X	0.202868	-0.0245828	0.832828	1.57191	2.10548
58	C3	AK017968	5830433M15Rik	GENE412X	0.31125	0.662662	1.76552	1.72514	2.11384
59	C3	AK017972	5830436C15Rik	GENE559X	0.125316	-0.423044	0.783597	1.88234	1.77818
60	C3	AK018070	Lpo	GENE81X	0.692416	-0.868521	2.06091	2.90572	0.919762
61	C3	AK018160	March3	GENE120X	0.157259	-0.458784	0.954733	2.09592	1.84831
62	C3	AK018741	0610011L14Rik	GENE560X	0.308282	0.354621	1.69661	1.45634	2.01831
63	C3	AK018948	1700112J05Rik	GENE413X	0.568461	-0.0830744	1.15599	2.6155	1.80165
64	C3	AK019108	2210404J11Rik	GENE122X	0.152713	-0.134195	1.28053	1.79277	1.82788
65	C3	AK019328	2900037P16Rik	GENE415X	0.304993	0.0535171	1.68087	2.60342	1.86624
66	C3	AK019746	4930546K05Rik	GENE561X	0.133971	-0.486913	0.58944	1.89281	1.80834
67	C3	AK020204	8030450C14Rik	GENE417X	0.318204	0.796035	1.06633	1.5631	1.0575
68	C3	AK020591	Centb2	GENE562X	0.12051	-0.494078	1.16683	1.78588	1.98353
69	C3	AK021269	C530007A02Rik	GENE123X	0.537241	-1.39204	0.778627	2.02239	2.63978
70	C3	AY036886	Mll3	GENE83X	0.168571	0.0289683	1.72989	2.25949	1.65318
71	C3	BC003224	Rcbtb2	GENE419X	0.451462	-0.934781	1.4323	2.27623	1.50164
72	C3	BC003491	Hdhd3	GENE563X	0.101277	-0.59519	0.841602	1.54125	1.89983
73	C3	BC004837	Nat15	GENE565X	0.204466	-0.539498	1.39893	1.84538	1.70561
74	C3	BC005708	2610018G03Rik (Mst4)	GENE420X	1.0	-1.30705	1.93447	3.03229	-0.410999
75	C3	BC005755	Wdr77	GENE566X	0.342102	-0.461514	1.03977	1.69843	2.50148
76	C3	BC010981	BC010981	GENE125X	0.226955	-1.1709	1.44045	2.32913	1.8509
77	C3	BC011162	Ncald	GENE422X	0.328254	-0.782873	1.00713	2.3554	2.2978
78	C3	BC015290	Ces2	GENE567X	0.92153	0.430632	1.34482	1.25797	2.93182
79	C3	D45850	Akr1c6	GENE426X	0.198393	-0.00203885	1.32055	2.05911	1.60437
80	C3	J04761	Ubl4 / Slc10a3	GENE568X	0.125363	-0.673745	0.464014	1.70813	1.83156
81	C3	L19609	N/A	GENE569X	0.313533	0.410241	0.304757	1.16596	1.80273
82	C3	L23316	Gpsm1	GENE428X	0.379909	-0.493051	0.0870386	1.788	1.58891
83	C3	M12052	Cd8a	GENE429X	1.0	-0.121319	0.518297	1.88107	0.554288
84	C3	M17954	Gm1499	GENE570X	0.226313	-0.0541933	0.681007	1.14247	2.15574
85	C3	M18613	Klk1b14-ps	GENE571X	0.185478	-0.261108	0.682796	1.12887	2.18945
86	C3	M23013	Trf	GENE430X	0.293662	1.04188	0.862739	1.84899	1.06472
87	C3	M23016	Trf	GENE431X	0.337152	0.72374	0.701145	2.02485	1.46907
88	C3	M37009	Igh-6	GENE432X	0.183965	-0.781174	0.580272	1.86455	2.2577
89	C3	M92338	Igh-6	GENE572X	0.482205	0.905483	0.866893	0.838926	1.87124
90	C3	NM_007423	Afp	GENE573X	0.42036	-0.495108	0.0621082	0.915668	2.47756
91	C3	NM_007548	Prdm1	GENE434X	0.110084	-0.619332	0.951474	1.72179	1.72776
92	C3	NM_007770	Crx	GENE436X	0.290922	0.357502	1.95284	2.36157	1.91732
93	C3	NM_007785	Csn1s2a	GENE575X	0.379312	-0.440552	1.00707	2.84642	2.6032
94	C3	NM_007990	Fau	GENE134X	0.186477	-0.927382	1.25554	1.98318	1.90285
95	C3	NM_008040	Fpr-rs3	GENE438X	0.138949	-0.0746658	1.53627	1.95444	1.85517
96	C3	NM_008397	Itga6	GENE576X	0.113165	-0.453097	0.670278	1.77504	2.20685
97	C3	NM_008718	Npas1	GENE439X	0.532345	-0.386251	0.954838	2.5148	0.154104
98	C3	NM_008883	Plxna3	GENE441X	0.152815	0.834196	0.885803	1.71024	1.41193
99	C3	NM_009175	St6gal1	GENE443X	1.0	-0.994597	2.56794	3.73331	0.273682
100	C3	NM_009261	Strbp	GENE578X	0.216741	0.620273	1.42272	1.46317	1.66071
101	C3	NM_009369	Tgfbi	GENE138X	0.15766	-0.00041321	1.82672	2.00403	2.01238
102	C3	NM_009699	Aqp2	GENE140X	0.473513	-0.259203	1.07275	2.3119	3.25164
103	C3	NM_010248	Gab2	GENE580X	0.134696	-0.693011	0.842177	2.02494	1.99273
104	C3	NM_010287	Gpr83	GENE87X	1.0	-0.926031	1.86225	3.69999	-0.0360015
105	C3	NM_010296	Gli	GENE445X	0.394056	-1.03372	0.99728	1.76734	1.50003
106	C3	NM_010556	Il3	GENE88X	0.692416	-0.435127	2.03441	2.7848	0.781349
107	C3	NM_010570	Irs1	GENE89X	1.0	-0.149402	2.121	2.96141	0.247561
108	C3	NM_011139	Pou2f3	GENE582X	0.261532	-0.239271	0.147351	1.04816	1.81795
109	C3	NM_011488	Stat5a	GENE583X	0.427071	-0.993792	0.277832	1.72773	1.89187
110	C3	NM_011561	Tdg	GENE446X	1.0	-0.749655	0.887596	2.03941	-0.908311
111	C3	NM_011709	Wap (WFDC5)	GENE141X	1.0	-0.726317	0.5569	3.26457	3.8234
112	C3	NM_011964	Psg19	GENE447X	0.397355	-0.398218	1.29967	2.34833	-0.0428214
113	C3	NM_013629	Phtf1	GENE449X	0.25788	0.528926	1.05625	2.16396	2.1515
114	C3	NM_013630	Pkd1	GENE91X	0.232935	0.326519	1.80363	2.09955	2.05632
115	C3	NM_013788	Peg12	GENE450X	0.514329	-0.659498	1.51848	2.73001	0.0566679
116	C3	NM_015802	Dlc1	GENE584X	0.565662	0.278422	1.30494	1.68978	2.53849
117	C3	NM_016914	Prg3	GENE585X	0.187802	-0.992467	0.736964	1.50472	1.82856
118	C3	NM_020501	Tas2r105	GENE587X	0.247833	0.00540853	0.782101	1.3618	1.81363
119	C3	NM_021275	Kcna4	GENE145X	0.194541	-0.471314	1.24152	2.29795	2.07858
120	C3	NM_021396	Pdcd1lg2	GENE588X	0.277327	-0.574864	0.191653	1.58218	2.34933
121	C3	NM_021542	Kcnk5	GENE456X	1.0	0.220821	1.45013	2.19857	-0.23067
122	C3	NM_023120	Gnb1l	GENE457X	0.317493	-0.0625023	0.554063	2.14899	2.02356
123	C3	NM_023907	Foxi1	GENE458X	0.605851	-0.24714	0.433268	2.6692	2.6486
124	C3	NM_025308	1810007E14Rik	GENE589X	0.274831	-0.427589	0.772967	2.01268	2.50072
125	C3	NM_025369	Mrps36	GENE459X	0.607879	-0.293547	0.429147	1.81444	2.80263
126	C3	NM_025384	Dnajc15	GENE590X	0.201323	0.19081	0.619911	1.3465	1.8433
127	C3	NM_025415	Cks2	GENE460X	1.0	-0.229558	0.523903	1.53786	0.0127596
128	C3	NM_025888	Kctd20	GENE591X	0.215962	-0.574353	0.692419	1.19565	2.29533
129	C3	NM_026021	Zmynd19	GENE592X	0.309821	0.398243	0.729022	0.957309	1.60683
130	C3	NM_026247	Alg13	GENE461X	0.499553	-0.369434	1.33842	2.26993	0.930368
131	C3	NM_026506	Snrpg	GENE593X	0.299175	-0.100131	0.379383	0.711099	1.71666
132	C3	NM_027137	Sprrl7	GENE462X	1.0	-0.323929	1.94867	2.12736	-0.300027
133	C3	NM_031404	Actl6	GENE594X	0.111155	-0.66955	0.759309	1.42436	2.01065
134	C3	S59139	N/A	GENE148X	0.292241	-1.23518	1.35218	1.97179	1.84888
135	C3	S72513	Igh-6	GENE595X	0.514328	0.67355	0.64188	0.669814	2.15917
136	C3	U01314	Igk-V1	GENE463X	0.151561	0.727844	1.04709	1.85034	1.94796
137	C3	U09054	Ube1y1-ps2	GENE464X	0.887691	-0.0698972	1.62529	1.84975	0.959077
138	C3	U09591	N/A	GENE149X	0.198551	-0.11904	1.00127	1.83854	2.24784
139	C3	X04231	N/A	GENE465X	0.226004	1.16418	0.822729	1.60077	1.62728
140	C3	X16223	H2-T24	GENE466X	0.946272	0.157259	0.031089	1.82674	2.33114
141	C3	X58835	Igh-1a	GENE598X	0.203495	0.703252	1.043	1.41359	1.85301
142	C3	Z12376	N/A	GENE470X	0.114235	0.969816	1.12788	1.718	1.56525
143	C3	Z12453	N/A	GENE471X	0.148148	1.11502	1.20345	1.72029	1.2224
144	C3	Z33491	N/A	GENE473X	0.443892	-0.131293	1.45097	2.22108	3.11697
-	C3	Average profile				-0.235827	0.955694	1.83197	1.71348
	C3	Trajectory profile				1	1	2	2

## Sheet: Table S4-C4
Number	Flag	Gene		Eweight	Gweight	Developmental stage
		NCBI ID	Official Symbol			P5	P14	L1	L12
1	C4	AB049967	Igk-V8	GENE17X	0.57917	-0.701896	2.74457	2.74672	2.42433
2	C4	AB054000	1110028A07Rik (Fit1)	GENE102X	0.200113	-1.19763	1.39516	2.1594	2.17463
3	C4	AB054591	Pip5k2c	GENE382X	0.680243	-0.830899	2.37519	3.23779	3.23299
4	C4	AF093554	N/A	GENE103X	0.203874	-0.856829	1.52673	2.26314	2.69237
5	C4	AF133818	Zranb2	GENE18X	1.0	0.298391	3.04832	2.15281	2.29925
6	C4	AF154337	Gpr137b	GENE104X	0.576333	-1.01518	1.7875	2.76506	3.37309
7	C4	AK002805	0610038L08Rik	GENE387X	0.522143	-0.49236	1.274	2.99021	2.48258
8	C4	AK003015	0710007G10Rik	GENE105X	0.709167	-1.10738	3.23155	2.57198	2.7666
9	C4	AK006916	Spata18	GENE21X	0.136929	-0.623039	1.73953	2.6027	2.02494
10	C4	AK009013	2300002M23Rik	GENE110X	0.463414	0.0558392	2.64371	3.31233	3.24221
11	C4	AK011126	Lsm12	GENE77X	0.53411	-0.339933	2.07462	2.39873	2.93426
12	C4	AK011684	2610035F20Rik	GENE23X	0.57525	-1.09302	3.02541	3.01099	2.78951
13	C4	AK011923	2610208K16Rik	GENE24X	0.302148	-0.168367	2.38808	3.12437	3.13554
14	C4	AK013379	Mctp1	GENE402X	0.51714	-0.33346	2.53395	2.51191	2.50568
15	C4	AK013764	2900072D07Rik	GENE25X	1.0	0.701142	2.86152	3.09646	2.45436
16	C4	AK013958	3110001L01Rik	GENE112X	0.140249	-0.436014	1.69393	2.30458	1.96928
17	C4	AK014828	4921506M07Rik	GENE115X	0.155617	-0.541769	1.65412	2.57161	1.94881
18	C4	AK015632	4930486I03Rik	GENE116X	1.0	-1.27333	1.57651	3.05546	2.90135
19	C4	AK015773	1700025F24Rik	GENE407X	0.183448	-0.256388	2.09228	2.45143	1.96421
20	C4	AK015902	4930526H09Rik	GENE117X	0.437869	-0.715361	2.01024	2.679	3.27036
21	C4	AK017182	5033421C21Rik	GENE556X	0.14928	-0.382624	1.72146	2.2648	2.3318
22	C4	AK017198	Tmem188	GENE118X	0.272642	-0.25532	1.52806	2.21298	2.46149
23	C4	AK017289	5430410E06Rik	GENE80X	0.752859	-1.35424	2.77225	3.22196	2.48642
24	C4	AK018096	Ccdc138	GENE119X	0.328576	-1.19474	1.82559	2.14563	2.46558
25	C4	AK018872	1700063I16Rik	GENE121X	0.189149	-0.921629	1.5127	2.66044	2.00408
26	C4	AK019494	Plb1	GENE27X	0.902728	0.325542	2.51837	2.43845	2.09095
27	C4	AK020111	6720418B01Rik	GENE29X	1.0	-1.38807	3.45878	3.44881	3.28163
28	C4	AK020918	A930032L01Rik	GENE31X	1.0	-0.714395	2.27003	2.02726	2.18408
29	C4	AK021087	C030017B01Rik	GENE82X	0.996117	-1.24189	2.83253	3.64468	4.11931
30	C4	AY033771	Akap13	GENE32X	1.0	-1.32591	2.60222	3.81996	2.83525
31	C4	AY036118	Etf1	GENE124X	0.676601	1.03759	2.16324	2.67648	2.08039
32	C4	BC006631	Numa1	GENE33X	0.812546	-1.29037	2.20454	2.75163	1.88399
33	C4	BC006835	Gigyf2	GENE84X	0.685704	-1.56186	3.2345	4.11247	3.91284
34	C4	BC008638	Dars	GENE35X	0.389695	-0.119416	2.28044	2.69561	2.80833
35	C4	D29926	Igk-V	GENE424X	0.804733	-0.643284	1.90345	2.04491	1.48529
36	C4	D31768	Amelx	GENE126X	0.201318	-1.18471	1.39414	2.25793	2.4275
37	C4	L05518	N/A	GENE427X	0.729267	-0.0608833	1.77437	2.90936	2.91678
38	C4	M16162	Igk-V23	GENE128X	0.281648	-0.630324	1.93825	2.95444	1.96237
39	C4	M57991	N/A	GENE129X	0.174879	-0.450295	1.86477	2.59053	2.45835
40	C4	M63673	N/A	GENE130X	0.413298	-0.792365	2.38603	2.91071	1.92224
41	C4	M92400	N/A	GENE132X	0.887084	-1.29229	1.96848	3.05899	3.76443
42	C4	M94020	N/A	GENE433X	0.891033	-0.143273	2.1464	3.61346	3.71396
43	C4	NM_007680	Ephb6	GENE435X	0.245311	-0.323058	1.4444	2.49013	2.6129
44	C4	NM_007754	Cpd	GENE133X	0.475036	0.128028	2.14105	2.90927	3.32222
45	C4	NM_007784	Csn1s1	GENE36X	0.751527	-1.7106	2.82667	4.09255	4.19375
46	C4	NM_008095	Gbas	GENE37X	0.883682	-1.33765	2.99598	3.79603	3.53652
47	C4	NM_008305	Hspg2	GENE135X	0.411725	0.205437	2.21824	3.33551	3.22516
48	C4	NM_008611	Mmp8	GENE136X	0.179045	-0.994689	1.51451	2.69505	2.17277
49	C4	NM_008765	Orc2l	GENE577X	0.58006	0.705741	1.5211	2.75879	2.85173
50	C4	NM_009046	Relb	GENE38X	1.0	-0.426408	3.70491	3.83052	4.03939
51	C4	NM_009633	Adra2b	GENE139X	0.176573	-0.868188	1.6871	2.23627	2.43646
52	C4	NM_009696	Apoe	GENE86X	0.852667	0.244862	2.69124	2.68705	2.97967
53	C4	NM_009972	Csn2	GENE39X	1.0	-1.62781	4.32257	3.89228	4.00553
54	C4	NM_010597	Kcnab1	GENE90X	1.0	-1.48784	3.25501	4.20087	1.14675
55	C4	NM_011795	C1ql1	GENE142X	0.58006	0.995222	1.5402	2.8986	2.76984
56	C4	NM_011873	Dazap2	GENE143X	0.170995	-0.419442	2.02668	2.64927	2.24945
57	C4	NM_015731	Atp9a	GENE451X	0.159594	-0.849411	1.69285	2.57085	2.4418
58	C4	NM_016798	Pdlim3	GENE93X	0.649177	-0.305444	2.5819	3.25217	2.76022
59	C4	NM_017465	Sult2b1	GENE144X	0.151206	-0.312711	1.89361	2.58633	2.21341
60	C4	NM_025545	Aptx	GENE146X	0.30901	-1.15923	1.35274	2.7942	2.23535
61	C4	NM_030553	Olfr160	GENE95X	1.0	-1.27652	3.26344	3.10287	4.12338
62	C4	X17173	N/A	GENE97X	0.372256	-0.564647	2.42373	2.97084	2.11532
63	C4	X53402	Aldob	GENE468X	0.138173	-0.833964	1.39353	2.39505	2.35941
64	C4	X65980	Mylc2pl	GENE98X	1.0	0.0761932	4.11659	4.18383	2.22889
65	C4	X66656	N/A	GENE469X	0.469481	-0.636211	2.05414	3.04608	3.04794
66	C4	Z25735	Pou2f2	GENE472X	0.891033	-0.686217	2.04303	3.79772	3.82194
-	C4	Average profile				-0.604229	2.2452	2.90606	2.71767
	C4	Trajectory profile				1	2	2	2

## Sheet: Table S4-C5
Number	Flag	Gene		Eweight	Gweight	Developmental stage
		NCBI ID	Official Symbol			P5	P14	L1	L12
1	C5	AF082159	Grifin	GENE152X	0.285974	-1.50869	-1.07546	-2.21025	-2.98934
2	C5	AF090190	Kif1b	GENE610X	0.027424	-1.62145	-1.32234	-1.97807	-2.03514
3	C5	AF153479	Ptges3	GENE153X	0.378059	-1.26152	-0.688141	-2.00353	-2.70227
4	C5	AF156987	Cry2	GENE99X	1.0	-2.91447	-3.54692	-3.46858	-2.97656
5	C5	AF282301	Olfr148	GENE48X	0.114654	-1.78913	-1.36748	-2.10591	-2.67119
6	C5	AF312007	Sgk3	GENE156X	0.037241	-1.42409	-1.18685	-2.06397	-2.34274
7	C5	AF357494	N/A	GENE157X	0.461434	-1.24029	-1.04666	-2.15163	-3.32002
8	C5	AJ409484	N/A	GENE49X	0.041517	-1.77502	-1.25642	-1.83168	-2.33116
9	C5	AJ409493	N/A	GENE237X	0.208081	-2.15057	-1.5961	-1.69136	-1.85358
10	C5	AK003679	Cul4a	GENE238X	0.052861	-1.83029	-1.42266	-1.76416	-2.3663
11	C5	AK004487	Lhfpl4	GENE480X	0.294179	-1.63132	-1.41622	-2.56	-1.82046
12	C5	AK004614	Arrb1	GENE630X	0.132328	-1.58837	-0.852894	-1.85748	-2.48994
13	C5	AK006198	1700021F02Rik	GENE162X	0.419204	-2.26228	-1.75193	-1.7618	-2.69019
14	C5	AK006412	1700027F06Rik	GENE163X	0.037115	-1.51436	-1.29605	-2.15508	-1.99978
15	C5	AK006973	1700081N11Rik	GENE642X	0.072084	-1.63562	-0.949162	-1.39316	-2.30265
16	C5	AK007756	1810043H04Rik	GENE167X	0.038124	-1.60622	-1.39455	-2.02246	-2.38281
17	C5	AK008369	2010109N14Rik	GENE651X	0.074183	-1.57897	-1.27153	-1.93369	-2.67955
18	C5	AK008908	2210412E05Rik	GENE653X	0.414386	-1.72825	-1.28182	-1.5894	-3.0659
19	C5	AK011632	2610030H06Rik (UPF0569 transmembrane protein)	GENE487X	0.941338	-2.2359	-2.05321	-2.52731	-2.74442
20	C5	AK012000	2610306O10Rik	GENE488X	0.068405	-1.67912	-1.45955	-2.15364	-1.74387
21	C5	AK012956	Rnf216	GENE170X	1.0	-0.996002	-2.11498	-2.38009	-2.54389
22	C5	AK013287	Nat13	GENE489X	0.045856	-1.6973	-1.48972	-2.15212	-2.07448
23	C5	AK013512	Lrrc47	GENE171X	0.691295	-1.70974	-1.71944	-2.49029	-3.89623
24	C5	AK013906	3021401C12Rik	GENE50X	0.087592	-1.872	-1.11205	-2.07623	-1.95013
25	C5	AK014123	3110035E14Rik	GENE669X	0.068845	-1.56266	-1.12944	-1.38195	-2.40852
26	C5	AK014239	3110067G11Rik	GENE100X	0.719225	-1.72919	-2.26057	-2.19959	-2.46333
27	C5	AK015862	4930521G14Rik	GENE173X	0.063758	-1.48611	-1.28974	-2.25693	-2.37384
28	C5	AK015953	4930533D04Rik	GENE219X	0.120518	-1.99894	-1.72489	-2.18041	-2.17481
29	C5	AK016577	Ttll11	GENE220X	0.032273	-1.72132	-1.42434	-1.92721	-2.01499
30	C5	AK016877	4933423N03Rik	GENE176X	0.029219	-1.38926	-1.3473	-2.07799	-2.12397
31	C5	AK018225	6330532G10Rik	GENE378X	0.079247	-1.40908	-1.85103	-1.8219	-1.90771
32	C5	AK018323	Med12l	GENE379X	0.338506	-1.72009	-2.12755	-2.21248	-1.89734
33	C5	AK020201	8030444G23Rik	GENE221X	0.248814	-2.35164	-1.52745	-2.11218	-2.26255
34	C5	AK021114	C030032G21Rik	GENE713X	0.128851	-1.13725	-1.24915	-1.54259	-2.68579
35	C5	AK021189	2810021B07Rik (Ttdn1)	GENE715X	0.03058	-1.75056	-1.32433	-1.73924	-1.89007
36	C5	AK021311	D530037P16Rik	GENE381X	0.9932	-1.49479	-1.91712	-2.51411	-1.342
37	C5	AY029528	Xpo6	GENE183X	0.055621	-1.73413	-1.41924	-2.10861	-2.44143
38	C5	BC005527	Enpp3	GENE222X	0.113456	-2.01007	-1.54462	-2.28808	-2.16362
39	C5	BC009134	Dock9	GENE241X	0.035163	-1.72369	-1.27507	-1.99797	-1.9924
40	C5	BE571810	Sva / Sca2 (Atxn2)	GENE724X	1.0	-0.825797	-0.0696292	-1.37756	-3.37785
41	C5	BF163506	Gsto1	GENE726X	0.758681	-1.04484	-0.738691	-1.46145	-3.01889
42	C5	D30730	Nf1	GENE186X	0.21335	-2.14785	-1.68993	-2.26484	-1.97121
43	C5	M31441	Rad52	GENE504X	0.083831	-1.45112	-1.46506	-2.17732	-1.62051
44	C5	M36516	Zfp28	GENE188X	0.039728	-1.72329	-1.45797	-1.73124	-2.2731
45	C5	M60493	Cftr	GENE242X	0.334469	-2.26801	-1.35285	-1.50759	-2.12533
46	C5	NM_008465	Kpna1	GENE51X	0.102365	-1.99643	-1.52811	-1.71559	-2.43302
47	C5	NM_008697	Nin	GENE191X	0.146779	-1.07987	-0.971455	-2.05159	-2.55369
48	C5	NM_008732	Slc11a2	GENE192X	0.058507	-1.90461	-1.55633	-1.87444	-2.26637
49	C5	NM_009212	Ighmbp2	GENE193X	0.118596	-1.43896	-1.32343	-1.61901	-2.75278
50	C5	NM_009299	Sva	GENE194X	0.693983	-0.795115	-1.11614	-2.20147	-2.93518
51	C5	NM_010045	Darc	GENE763X	0.450375	-1.78812	-1.83513	-1.76581	-2.77564
52	C5	NM_010133	En1	GENE764X	0.549149	-1.82165	-1.70988	-2.34897	-3.46173
53	C5	NM_010518	Igfbp5	GENE197X	0.027151	-1.52439	-1.38832	-1.98707	-1.87456
54	C5	NM_011136	Pou2af1	GENE198X	0.078615	-1.99565	-1.63589	-1.96805	-2.28014
55	C5	NM_013838	Trpc6	GENE514X	0.041053	-1.56027	-1.54515	-2.12154	-2.18937
56	C5	NM_016780	Itgb3	GENE52X	0.581819	-2.18364	-1.4762	-2.44826	-2.92648
57	C5	NM_016909	Tsnax	GENE203X	0.034224	-1.66336	-1.46094	-2.03481	-2.13632
58	C5	NM_019689	Arid3b	GENE781X	1.0	-1.57868	-0.575806	-1.11519	-2.90077
59	C5	NM_020291	Olfr480 (OR51I1)	GENE41X	0.183379	2.5658	2.49077	2.56401	2.71201
60	C5	NM_021388	Extl2	GENE783X	0.276936	-1.45455	-1.23007	-1.86823	-3.13555
61	C5	NM_026306	0610038D11Rik (TRM112-like protein)	GENE53X	0.040749	-1.829	-1.21388	-1.7512	-2.08141
62	C5	S76791	Nfasc	GENE42X	0.184411	-1.50087	-2.02306	-1.97483	-2.08059
63	C5	U34828	Rny1	GENE207X	1.0	-1.84507	-2.7395	-3.52304	-3.74778
64	C5	X06746	Egr2	GENE210X	0.038152	-1.4989	-1.31142	-2.09492	-2.345
65	C5	X16216	N/A	GENE801X	0.372909	-1.85429	-1.32931	-2.33695	-3.13895
-	C5	Average profile				-1.61203	-1.39472	-1.95672	-2.3565
	C5	Trajectory profile				0	1	0	0

## Sheet: Table S4-C6
Number	Flag	Gene		Eweight	Gweight	Developmental stage
		NCBI ID	Official Symbol			P5	P14	L1	L12
1	C6	AF023243	Igh-6	GENE73X	0.19554	2.05925	2.69731	2.64049	2.23169
2	C6	AF093560	Igh-6	GENE525X	0.153048	1.9995	2.47218	2.56372	2.08977
3	C6	AK003325	1110002N22Rik	GENE19X	0.583041	1.75311	3.09497	3.21258	3.09794
4	C6	AK003404	Fbxl22	GENE1X	0.221745	2.47719	2.76143	2.29518	2.49447
5	C6	AK006745	1700049J03Rik	GENE20X	1.0	2.16384	3.57288	2.89113	2.54976
6	C6	AK006929	Cldnd2	GENE75X	0.179769	2.36036	2.98801	2.42186	2.31235
7	C6	AK014261	3110079O15Rik	GENE26X	0.817216	1.49152	2.37663	2.86775	3.02688
8	C6	AK014901	4921515L22Rik	GENE342X	0.201825	2.09723	2.57054	2.3856	2.37607
9	C6	AK016169	4930558C23Rik	GENE11X	0.162609	2.49614	2.89683	2.62573	2.21696
10	C6	AK016817	Gpr39	GENE2X	1.0	3.11456	3.81602	2.98973	2.39862
11	C6	AK020709	A230103L15Rik	GENE30X	0.51578	1.64186	2.78099	3.22009	3.04388
12	C6	AK020940	A930037H05Rik	GENE418X	0.387504	2.91767	3.24389	2.71297	2.48225
13	C6	AK021034	B830042I05Rik	GENE3X	0.381587	2.16355	2.67995	2.63899	2.89343
14	C6	BC004009	Farp1	GENE225X	0.445015	3.03956	3.29592	2.63798	2.58879
15	C6	BC012520	Pank4	GENE423X	0.320081	2.65153	2.30702	2.57959	2.11953
16	C6	L37414	Gm1499	GENE127X	0.557896	2.24119	2.37359	3.27458	2.38131
17	C6	NM_009329	Zfp354a	GENE5X	0.486612	2.12366	2.58155	3.28994	2.5417
18	C6	NM_009996	Cyp24a1	GENE6X	0.573145	2.36207	2.83031	3.02604	2.8682
19	C6	NM_010577	Itga5	GENE68X	0.287119	2.79658	3.19697	2.49093	2.16908
20	C6	NM_016845	Acrbp	GENE235X	0.248044	2.59218	2.27251	2.32696	2.26054
21	C6	NM_020004	Gcn5l2	GENE94X	0.637482	2.038	2.66058	2.61224	3.28799
22	C6	NM_024435	Nts	GENE7X	0.180664	2.46948	2.91451	2.43987	2.3879
23	C6	S37484	Agtr1a	GENE16X	0.949091	2.87	2.53694	3.04778	2.36193
24	C6	X16496	Hist1h3g	GENE467X	1.0	1.71598	3.61863	4.05196	3.84115
25	C6	X96705	Def6	GENE40X	0.404911	-1.58091	-2.03763	-1.93759	-1.85807
-	C6	Average profile				2.16649	2.65855	2.61107	2.41385
	C6	Trajectory profile				2	2	2	2
