# Supplementary material for: Identification of Putative Ortholog Gene Blocks Involved in Gestant and Lactating Mammary Gland Development: A Rodent Cross-Species Microarray Transcriptomics Approach
Source: Int J Genomics. 2013 Oct 30;2013:624681. doi: 10.1155/2013/624681 (PMC3830774; doi:10.1155/2013/624681)
Supplement: Supplementary file 1 — This manuscript contains supplementary material to give a better overview of the results. In Table S1 we are describing the experimental design of heterologous microarrays hybridization; in Table S2 we showed the primers and probes for the qRT-PCR analysis for confirmation of microarray results. In S3 we are showing the list of up- and downregulated genes during pregnancy (P5, P14) and/or lactation (L1, L12) that shared spatial and temporal distributions. In S4 we described all the gene hierarchical cluster sets of altered gene transcript. In S5 is the list of altered gene transcript K-means cluster sets that correspond to potential groups of co-regulated genes. K-means clustering revealed six distinct clusters (K1-6) that distinguished up from down, early from middle, and transient from sustained changes in expression. The data from Table S6 shows the list of orthologous significant altered gene transcripts to rat and/or human in pregnancy (day 5 and 14) and lactancy (day 1 and 12). The Table S7 shows the list of families of transcription factors identified in different stage development of mammary gland. Finally in Table S8 we are describing the functional gene blocks detailed information. [file 624681.f1.zip › 624681.f5.xls]

## Sheet: Table S5-K1
Number	Flag	Gene		Gweight	Developmental stage
		NCBI ID	Official Symbol		P5	P14	L1	L12
1	K1	AA255235	Rdh9	1	-1.23778	-1.5738	-1.72039	-2.47756
2	K1	AB010319	Zfp287	1	-0.909526	-1.83332	-1.43688	-1.77685
3	K1	AB010374	Zfp712	1	-1.53661	-1.46757	-1.59194	-1.81968
4	K1	AB055854	Gmcl1l	1	-1.41296	-1.28245	-1.55251	-1.56163
5	K1	AF053956	Runx2	1	-1.29441	-1.19687	-1.67779	-1.78567
6	K1	AF061529	Herc2	1	-1.12143	-0.86163	-1.77961	-1.74085
7	K1	AF073882	Mtmr7	1	-0.970112	-2.75266	-0.978552	-1.44967
8	K1	AF082159	Grifin	1	-1.50869	-1.07546	-2.21025	-2.98934
9	K1	AF090190	Kif1b	1	-1.62145	-1.32234	-1.97807	-2.03514
10	K1	AF112439	Fancg	1	-1.38253	-1.30341	-1.20195	-1.92074
11	K1	AF117340	Map3k1	1	-1.89299	-1.24434	-1.10238	-1.12323
12	K1	AF126457	X76971	1	-0.900992	-1.1004	-1.40639	-1.67243
13	K1	AF133093	L1cam / Abcd1 / Ssr4 / Idh3g / Plxnb3 / Srpk3 / Ard1 / Plxn6-pending / Arhgap4 / Hcfc1 / Pdzd4 / Renbp / Avpr2	1	-1.30725	-0.884564	-1.50497	-1.93282
14	K1	AF146569	Gprin1	1	-1.31704	-1.61147	-1.9433	-1.78441
15	K1	AF153479	Ptges3	1	-1.26152	-0.688141	-2.00353	-2.70227
16	K1	AF156987	Cry2	1	-2.91447	-3.54692	-3.46858	-2.97656
17	K1	AF184275	Fbxo18	1	-0.900658	-1.22478	-1.47473	-1.76667
18	K1	AF236125	Punc	1	-1.30337	-1.53177	-1.80242	-2.30074
19	K1	AF280809	Dusp3	1	-1.10098	-1.47115	-2.04675	-2.29527
20	K1	AF282291	Olfr926	1	-1.89592	-0.78742	-0.907022	-0.990286
21	K1	AF282301	Olfr148	1	-1.78913	-1.36748	-2.10591	-2.67119
22	K1	AF312007	Sgk3	1	-1.42409	-1.18685	-2.06397	-2.34274
23	K1	AF319983	Magee2	1	-1.17608	-0.940842	-1.80925	-1.69388
24	K1	AF357494	N/A	1	-1.24029	-1.04666	-2.15163	-3.32002
25	K1	AJ006585	Eif2s3x-ps1	1	-1.60709	-1.18906	-1.6135	-2.19203
26	K1	AJ132391	Aldoc	1	-0.820973	-1.61764	-1.82607	-1.57554
27	K1	AJ245945	Ngb	1	-1.38145	-0.965121	-1.88836	-2.14587
28	K1	AJ292968	Sav1	1	-1.22119	-1.05144	-1.43866	-2.20873
29	K1	AJ409484	N/A	1	-1.77502	-1.25642	-1.83168	-2.33116
30	K1	AJ409493	N/A	1	-2.15057	-1.5961	-1.69136	-1.85358
31	K1	AK002276	0610007C21Rik (Apr3)	1	-1.24531	-1.19066	-1.4771	-1.87653
32	K1	AK003316	Mbnl2	1	-1.52268	-0.822409	-0.697381	-1.09532
33	K1	AK003432	Xpot	1	-0.999606	-1.25876	-1.45632	-1.54498
34	K1	AK003679	Cul4a	1	-1.83029	-1.42266	-1.76416	-2.3663
35	K1	AK004090	1110034G24Rik	1	-1.17537	-1.63095	-1.87711	-1.13659
36	K1	AK004153	1110038D17Rik (C22orf13 (LLN4))	1	-1.38606	-1.12144	-1.87056	-2.04871
37	K1	AK004457	1190002N15Rik (UPF0672 protein C3orf58)	1	-1.29535	-1.33526	-1.90586	-1.78478
38	K1	AK004487	Lhfpl4	1	-1.63132	-1.41622	-2.56	-1.82046
39	K1	AK004614	Arrb1	1	-1.58837	-0.852894	-1.85748	-2.48994
40	K1	AK005166	Ihpk2	1	-1.74761	-1.47285	-1.40206	-1.69194
41	K1	AK005649	1700003L19Rik	1	-1.31591	-1.46835	-1.87609	-2.50963
42	K1	AK006118	Wdr16	1	-1.07092	-1.20734	-1.41676	-2.18818
43	K1	AK006198	1700021F02Rik	1	-2.26228	-1.75193	-1.7618	-2.69019
44	K1	AK006245	1700022K14Rik	1	-1.3027	-1.30539	-1.64138	-1.95949
45	K1	AK006412	1700027F06Rik	1	-1.51436	-1.29605	-2.15508	-1.99978
46	K1	AK006438	Eid3	1	-1.33718	-1.22378	-1.94295	-1.98626
47	K1	AK006784	N/A	1	-0.889086	-1.69525	-0.672298	-1.11906
48	K1	AK006873	1700063K16Rik	1	-1.30128	-1.11646	-1.56834	-0.932103
49	K1	AK006934	1700072B07Rik	1	-1.08801	-1.41017	-1.83747	-1.98347
50	K1	AK006964	1700081D17Rik (Pebp4)	1	-1.62364	-1.39101	-1.29672	-1.65205
51	K1	AK006973	1700081N11Rik	1	-1.63562	-0.949162	-1.39316	-2.30265
52	K1	AK006981	1700082O11Rik	1	-1.38923	-1.11015	-1.36411	-1.88579
53	K1	AK007002	1700085B03Rik	1	-1.45166	-1.33715	-1.65727	-2.31311
54	K1	AK007385	1810008N23Rik (Amy2)	1	-1.53289	-1.40064	-1.84911	-2.14465
55	K1	AK007445	Trim15	1	-1.11758	-1.24644	-1.76768	-1.02365
56	K1	AK007756	1810043H04Rik	1	-1.60622	-1.39455	-2.02246	-2.38281
57	K1	AK008055	Pard3b	1	-1.07819	-0.890308	-1.60735	-1.24171
58	K1	AK008157	2010008C14Rik	1	-1.44924	-1.12278	-1.08258	-1.6238
59	K1	AK008369	2010109N14Rik	1	-1.57897	-1.27153	-1.93369	-2.67955
60	K1	AK008389	Ceacam18	1	-1.2036	-1.25871	-1.71739	-2.06309
61	K1	AK008890	Zfp84	1	-1.45108	-0.94429	-1.54857	-1.42677
62	K1	AK008908	2210412E05Rik	1	-1.72825	-1.28182	-1.5894	-3.0659
63	K1	AK009331	Arhgef12	1	-1.34305	-1.42133	-1.90472	-2.21724
64	K1	AK009780	2310043J07Rik	1	-1.07503	-0.886162	-1.61734	-1.82383
65	K1	AK010059	2310066D07Rik	1	-1.20227	-1.11741	-1.21176	-1.78679
66	K1	AK010289	Rpain	1	-1.6215	-0.869143	-1.14827	-1.55037
67	K1	AK010388	Glt8d1	1	-1.52907	-1.12069	-1.50064	-2.0228
68	K1	AK011091	2510042H03Rik	1	-1.64588	-0.723019	-1.25608	-1.85092
69	K1	AK011175	Elavl3	1	-1.42679	-1.0147	-1.50783	-1.73879
70	K1	AK011404	D19Ertd737e	1	-1.55735	-1.65468	-2.00534	-1.07257
71	K1	AK011534	Bmpr2	1	-1.0362	-1.93689	0.236301	-1.31179
72	K1	AK011632	2610030H06Rik (UPF0569 transmembrane protein)	1	-2.2359	-2.05321	-2.52731	-2.74442
73	K1	AK012000	2610306O10Rik	1	-1.67912	-1.45955	-2.15364	-1.74387
74	K1	AK012292	Entpd6	1	-1.98268	-0.689679	-0.733438	-1.57841
75	K1	AK012530	Dusp4	1	-1.14509	-0.998899	-1.82632	-1.95457
76	K1	AK012591	2700089I24Rik	1	-1.15348	-1.27268	-1.62293	-1.70189
77	K1	AK012956	Rnf216	1	-0.996002	-2.11498	-2.38009	-2.54389
78	K1	AK013287	Nat13	1	-1.6973	-1.48972	-2.15212	-2.07448
79	K1	AK013481	Epha4	1	-2.00892	-1.06616	-1.06231	-1.28641
80	K1	AK013512	Lrrc47	1	-1.70974	-1.71944	-2.49029	-3.89623
81	K1	AK013565	2900021C02Rik	1	-1.32401	-1.00606	-1.95181	-2.15237
82	K1	AK013604	2900027M19Rik	1	-1.48326	-1.63608	-1.73372	-1.80623
83	K1	AK013906	3021401C12Rik	1	-1.872	-1.11205	-2.07623	-1.95013
84	K1	AK014123	3110035E14Rik	1	-1.56266	-1.12944	-1.38195	-2.40852
85	K1	AK014239	3110067G11Rik	1	-1.72919	-2.26057	-2.19959	-2.46333
86	K1	AK014240	3110068A07Rik	1	-1.21447	-1.07547	-1.6184	-1.40519
87	K1	AK014697	Tm7sf4	1	-0.966977	-1.08935	-1.19388	-1.74733
88	K1	AK014745	4833421G17Rik	1	-1.10391	-1.24186	-1.84852	-2.05504
89	K1	AK014748	4833422B07Rik	1	-1.73742	-0.998958	-1.03953	-1.85996
90	K1	AK014764	N/A	1	-1.33465	-1.26825	-1.53817	-2.04654
91	K1	AK014869	Spata16	1	-1.04382	-1.08553	-1.66718	-1.78363
92	K1	AK014882	4921513I03Rik	1	-1.12623	-1.14192	-1.6825	-2.1405
93	K1	AK014964	4921525B02Rik	1	-1.76978	-0.798928	-1.22347	-1.27409
94	K1	AK015161	Morn1	1	-1.01399	-1.16558	-1.02193	-1.7871
95	K1	AK015281	4930431P22Rik	1	-1.12573	-1.24967	-1.2477	-1.71678
96	K1	AK015383	4930444M15Rik	1	-1.52674	-1.13103	-1.43362	-1.84041
97	K1	AK015479	4930456K20Rik	1	-1.2401	-1.10517	-1.40772	-1.89641
98	K1	AK015673	Fam154a	1	-1.31566	-1.46537	-1.67907	-1.48854
99	K1	AK015862	4930521G14Rik	1	-1.48611	-1.28974	-2.25693	-2.37384
100	K1	AK015953	4930533D04Rik	1	-1.99894	-1.72489	-2.18041	-2.17481
101	K1	AK016003	4930539N22Rik	1	-1.09945	-1.24955	-1.87645	-1.69378
102	K1	AK016146	4930556I23Rik	1	-1.21459	-1.10275	-1.72669	-1.82401
103	K1	AK016326	4930579J19Rik	1	-1.22127	-0.897766	-1.88581	-1.7077
104	K1	AK016518	Dscam	1	-0.708438	-1.2998	-1.70446	-2.13019
105	K1	AK016529	Clec16a	1	-1.2619	-0.724354	-1.0211	-1.51279
106	K1	AK016577	Ttll11	1	-1.72132	-1.42434	-1.92721	-2.01499
107	K1	AK016652	4933404K08Rik	1	-1.3128	-0.869904	-1.46473	-1.52407
108	K1	AK016773	Rbbp5	1	-1.53808	-1.06574	-1.15318	-1.75326
109	K1	AK016828	4933416A02Rik	1	-1.35105	-0.619697	-1.65136	-1.56245
110	K1	AK016877	4933423N03Rik	1	-1.38926	-1.3473	-2.07799	-2.12397
111	K1	AK017291	Stx16	1	-0.820587	-1.20031	-1.52801	-1.85656
112	K1	AK017509	Lca5	1	-1.17885	-1.39725	-1.85527	-2.0783
113	K1	AK017733	Wbscr16	1	-1.90781	-1.30241	-1.65511	-1.43481
114	K1	AK017945	5830424K16Rik	1	-1.43684	-1.12303	-1.66141	-1.91378
115	K1	AK018043	5830468K08Rik	1	-1.41554	-1.36338	-1.0636	-1.94704
116	K1	AK018053	5830474E16Rik	1	-1.72546	-1.18995	-1.76615	-1.54636
117	K1	AK018084	Gpsm2	1	-1.55148	-0.679568	-1.10163	-1.71051
118	K1	AK018175	6330415B21Rik	1	-1.36529	-1.23734	-1.07311	-1.67615
119	K1	AK018225	6330532G10Rik	1	-1.40908	-1.85103	-1.8219	-1.90771
120	K1	AK018228	Tmem29	1	-1.04261	-1.76957	-1.56445	-1.73778
121	K1	AK018314	Klhl24	1	-1.42847	-0.920186	-1.66225	-2.0099
122	K1	AK018323	Med12l	1	-1.72009	-2.12755	-2.21248	-1.89734
123	K1	AK018342	Rtf1	1	-1.20287	-1.21325	-1.90334	-2.08304
124	K1	AK018427	8430419K02Rik	1	-1.2562	-1.47933	-1.69298	-2.29515
125	K1	AK019094	2310046O06Rik	1	-1.09903	-0.971953	-1.23175	-1.67208
126	K1	AK019114	2400009B08Rik	1	-1.00068	-1.25438	-1.6409	-2.2193
127	K1	AK019322	Ttyh3	1	-1.63011	-1.07931	-1.12149	-1.40439
128	K1	AK019485	2810403D21Rik	1	-1.23094	-0.96825	-1.4734	-2.19176
129	K1	AK019501	4632418H02Rik	1	-1.62793	-1.06938	-1.76859	-1.60986
130	K1	AK019660	4930488B04Rik	1	-1.52187	-0.932379	-0.591716	-1.67036
131	K1	AK019691	4930522O17Rik	1	-1.02434	-1.00361	-1.14678	-1.61475
132	K1	AK019761	4930552P06Rik	1	-1.02058	-1.68862	-1.47181	-1.51869
133	K1	AK019999	5830406C21Rik	1	-1.33997	-1.29241	-1.91057	-2.37793
134	K1	AK020201	8030444G23Rik	1	-2.35164	-1.52745	-2.11218	-2.26255
135	K1	AK020283	9130219B18Rik	1	-1.49364	-1.16467	-1.67031	-2.0473
136	K1	AK020464	9430041J12Rik	1	-1.24623	-1.60921	-1.78833	-1.43409
137	K1	AK021019	Svil	1	-1.0501	-1.21792	-1.48615	-1.83368
138	K1	AK021079	C030014C12Rik	1	-1.12724	-0.912002	-1.12201	-1.47661
139	K1	AK021114	C030032G21Rik	1	-1.13725	-1.24915	-1.54259	-2.68579
140	K1	AK021132	Gprin3	1	-1.3079	-1.05755	-1.5488	-2.04519
141	K1	AK021189	2810021B07Rik (Ttdn1)	1	-1.75056	-1.32433	-1.73924	-1.89007
142	K1	AK021311	D530037P16Rik	1	-1.49479	-1.91712	-2.51411	-1.342
143	K1	AY029528	Xpo6	1	-1.73413	-1.41924	-2.10861	-2.44143
144	K1	BC003957	Fam131a	1	-1.12821	-1.14283	-1.55593	-0.653979
145	K1	BC005527	Enpp3	1	-2.01007	-1.54462	-2.28808	-2.16362
146	K1	BC005610	Tada2l	1	-1.80587	-1.37362	-1.8009	-1.44342
147	K1	BC005621	Lims1	1	-1.60336	-1.25454	-1.60153	-1.64613
148	K1	BC006060	Lars	1	-1.3786	-1.75653	-1.70883	-1.80256
149	K1	BC008158	Ifi35	1	-1.50722	-1.64065	-1.86935	-1.71602
150	K1	BC008166	Tax1bp3	1	-1.56448	-1.39897	-1.74462	-2.20818
151	K1	BC008617	Unc119b	1	-1.07105	-0.942909	-1.55522	-1.49849
152	K1	BC008995	Tars2	1	-1.87364	-1.02715	-1.48571	-1.68114
153	K1	BC009127	Ing4	1	-1.71949	-0.769265	-1.25678	-1.90751
154	K1	BC009134	Dock9	1	-1.72369	-1.27507	-1.99797	-1.9924
155	K1	BC010499	2610301G19Rik (KIAA1967 (DBC1))	1	-2.03681	-1.32962	-1.50713	-1.61714
156	K1	BC011313	Ubfd1	1	-1.29447	-1.0399	-1.58825	-1.60721
157	K1	BC011390	Ascc3l1	1	-1.131	-1.07316	-1.6621	-1.92959
158	K1	BC011472	Kdelr3	1	-1.86422	-1.32882	-1.74474	-1.45899
159	K1	BC012407	Aldh7a1	1	-0.972115	-1.08287	-1.34424	-1.47237
160	K1	BC013244	Scyl1bp1	1	-1.55805	-0.756167	-1.19873	-1.31886
161	K1	D17546	Col18a1	1	-1.06403	-0.895528	-1.3978	-1.928
162	K1	D30730	Nf1	1	-2.14785	-1.68993	-2.26484	-1.97121
163	K1	D50387	Gm1068	1	-1.18793	-1.14378	-1.4841	-1.5927
164	K1	D88447	Ubxn8	1	-1.41393	-1.14013	-1.55563	-1.54525
165	K1	J04610	Gm1418	1	-0.859124	-1.24652	-1.18607	-1.50329
166	K1	M18342	N/A	1	-1.41958	-1.1353	-1.60665	-2.31649
167	K1	M29244	N/A	1	-1.28431	-0.907496	-1.13378	-1.79765
168	K1	M31441	Rad52	1	-1.45112	-1.46506	-2.17732	-1.62051
169	K1	M31445	N/A	1	-1.36549	-1.14499	-1.93789	-1.77829
170	K1	M36516	Zfp28	1	-1.72329	-1.45797	-1.73124	-2.2731
171	K1	M36752	Igk-V8	1	-1.13464	-1.20486	-1.23201	-1.90993
172	K1	M60493	Cftr	1	-2.26801	-1.35285	-1.50759	-2.12533
173	K1	M93663	N/A	1	-0.769389	-1.20265	-1.5856	-2.03843
174	K1	NM_007396	Acvr2	1	-0.623675	-1.46658	-1.62512	-1.3015
175	K1	NM_007414	Adprh	1	-1.44188	-1.14702	-1.78734	-1.74269
176	K1	NM_007511	Atp7b	1	-1.37318	-1.22937	-1.77603	-1.37749
177	K1	NM_007677	Psg17	1	-1.53272	-0.372955	-0.757609	-1.13843
178	K1	NM_007814	Cyp2b19	1	-1.26455	-1.51908	-1.3849	-1.88046
179	K1	NM_007970	Ezh1	1	-1.44127	-1.31055	-1.4553	-1.8774
180	K1	NM_008366	Il2	1	-1.17486	-1.0835	-1.55455	-1.98287
181	K1	NM_008465	Kpna1	1	-1.99643	-1.52811	-1.71559	-2.43302
182	K1	NM_008610	Mmp2	1	-1.50304	-1.4105	-1.75693	-2.27278
183	K1	NM_008697	Nin	1	-1.07987	-0.971455	-2.05159	-2.55369
184	K1	NM_008732	Slc11a2	1	-1.90461	-1.55633	-1.87444	-2.26637
185	K1	NM_008878	Serpinf2	1	-1.73711	-0.396032	0.0989354	-0.15254
186	K1	NM_009212	Ighmbp2	1	-1.43896	-1.32343	-1.61901	-2.75278
187	K1	NM_009299	Sva	1	-0.795115	-1.11614	-2.20147	-2.93518
188	K1	NM_009353	Terf2	1	-0.976152	-1.44693	-1.67569	-2.07602
189	K1	NM_009429	Tpt1	1	-1.5593	-1.29516	-1.29331	-1.91197
190	K1	NM_009495	Vmn2r-ps160	1	-0.868287	-1.06045	-1.58507	-1.60446
191	K1	NM_009515	Was	1	-1.08281	-1.27136	-1.66613	-1.96349
192	K1	NM_009571	Zfy2	1	-1.57328	-1.31247	-1.44776	-1.98187
193	K1	NM_009738	Bche	1	-1.08246	-1.58779	-1.46681	-2.16922
194	K1	NM_009980	Ctbp2	1	-1.32906	-1.3457	-1.47377	-1.8641
195	K1	NM_010045	Darc	1	-1.78812	-1.83513	-1.76581	-2.77564
196	K1	NM_010133	En1	1	-1.82165	-1.70988	-2.34897	-3.46173
197	K1	NM_010329	Pdpn	1	-0.977588	-1.54425	-1.69577	-1.7168
198	K1	NM_010353	Gsg2	1	-1.34004	-1.22576	-1.70382	-1.64203
199	K1	NM_010401	Hal	1	-1.12066	-1.21925	-1.92418	-2.06384
200	K1	NM_010518	Igfbp5	1	-1.52439	-1.38832	-1.98707	-1.87456
201	K1	NM_011080	Phxr1	1	-1.23174	-1.1269	-1.33985	-2.23367
202	K1	NM_011136	Pou2af1	1	-1.99565	-1.63589	-1.96805	-2.28014
203	K1	NM_011203	Ptpn12	1	-0.864608	-1.34313	-1.21894	-1.6111
204	K1	NM_011475	Sprr2i	1	-1.63485	-0.625781	-0.574959	-0.568751
205	K1	NM_011863	Papss1	1	-0.600716	-1.12476	-1.60729	-1.37453
206	K1	NM_013509	Eno2	1	-1.06083	-0.790676	-1.36723	-1.53447
207	K1	NM_013778	Akr1c13	1	-1.08782	-1.16845	-1.53874	-1.99261
208	K1	NM_013810	Dbnl	1	-1.50053	-1.20205	-1.25274	-1.60534
209	K1	NM_013838	Trpc6	1	-1.56027	-1.54515	-2.12154	-2.18937
210	K1	NM_016685	Comp	1	-1.10877	-0.948749	-1.6102	-1.74278
211	K1	NM_016739	Caprin1	1	-1.06457	-1.46302	-1.99512	-2.48479
212	K1	NM_016748	Ctps	1	-1.29112	-1.36691	-1.73058	-1.89807
213	K1	NM_016780	Itgb3	1	-2.18364	-1.4762	-2.44826	-2.92648
214	K1	NM_016909	Tsnax	1	-1.66336	-1.46094	-2.03481	-2.13632
215	K1	NM_018759	Zfp326	1	-1.02467	-1.34135	-1.32825	-1.94091
216	K1	NM_018883	Camkk1	1	-1.53734	-0.804132	-1.35575	-1.97599
217	K1	NM_019692	Rit2	1	-1.65998	-0.757917	-0.796	-1.0688
218	K1	NM_020000	Med8	1	-1.01388	-0.933728	-1.7105	-1.95441
219	K1	NM_020291	Olfr480 (OR51I1)	1	2.5658	2.49077	2.56401	2.71201
220	K1	NM_021293	Cd33	1	-1.27048	-0.813598	-0.951076	-1.68125
221	K1	NM_021388	Extl2	1	-1.45455	-1.23007	-1.86823	-3.13555
222	K1	NM_025278	Gng12	1	-1.3626	-0.748601	-1.28386	-1.93253
223	K1	NM_025706	Tbc1d15	1	-1.20613	-1.12942	-1.28948	-1.74031
224	K1	NM_025834	Proz	1	-1.28371	-1.64429	-1.63876	-1.6715
225	K1	NM_025934	Riok2	1	-0.944713	-1.25295	-1.92708	-1.19582
226	K1	NM_026080	Mrps24	1	-1.29037	-1.08651	-1.69696	-1.84167
227	K1	NM_026275	Ube2r2	1	-1.15072	-1.01679	-1.36287	-2.12578
228	K1	NM_026306	0610038D11Rik (TRM112-like protein)	1	-1.829	-1.21388	-1.7512	-2.08141
229	K1	NM_029231	Pelp1	1	-0.986365	-1.08994	-1.75607	-2.22288
230	K1	NM_031368	Bglap-rs1	1	-0.918879	-1.19283	-1.59493	-0.993834
231	K1	NM_031387	Tdrd1	1	-0.779218	-1.08045	-1.607	-1.56464
232	K1	S76791	Nfasc	1	-1.50087	-2.02306	-1.97483	-2.08059
233	K1	S81393	Aga	1	-0.939146	-1.09552	-1.05841	-1.48899
234	K1	U22982	Gm1499	1	-1.23646	-1.30932	-1.57105	-1.64936
235	K1	U26790	LOC633760	1	-1.14352	-0.779814	-1.73811	-1.63042
236	K1	U29511	Zfp78 (ZNF135)	1	-1.3536	-1.02465	-1.4781	-1.44816
237	K1	U34828	Rny1	1	-1.84507	-2.7395	-3.52304	-3.74778
238	K1	U55583	Igk-V34	1	-1.13125	-1.09408	-1.41344	-1.9725
239	K1	U95030	Alcam	1	-1.36437	-1.5691	-0.911071	-1.92881
240	K1	X06746	Egr2	1	-1.4989	-1.31142	-2.09492	-2.345
241	K1	X16216	N/A	1	-1.85429	-1.32931	-2.33695	-3.13895
242	K1	X51742	N/A	1	-1.08719	-1.20427	-1.48156	-2.14537
243	K1	X66664	N/A	1	-1.02754	-0.840146	-1.73293	-1.91949
244	K1	Z16406	Meox2	1	-1.53625	-1.56703	-1.09112	-1.82337
245	K1	Z83814	Dnahc6	1	-1.55837	-0.817611	-1.09661	-1.22691
-	K1	Average profile			-1.37595	-1.2456	-1.61153	-1.88839
		Trajectory profile signature			1	1	0	0
			Cluster representative genes
			Transport
			Ubiquitin-mediated proteolysis
			Nucleotide binding / Transcription factors
			Olfatory transduction
			Inflamatory and immune response
			Metabolism
			Discarded
			Protein modification

## Sheet: Table S5-K2
Number	Flag	Gene		Gweight	Developmental stage
		NCBI ID	Official Symbol		P5	P14	L1	L12
1	K3	AF041943	N/A	1	1.76222	1.31545	1.32763	1.5528
2	K3	AF041944	N/A	1	1.8284	1.73343	1.58651	1.92731
3	K3	AF050425	N/A	1	1.55848	1.87435	1.94366	1.6824
4	K3	AF093549	Igh-6	1	0.940292	1.66546	1.29748	1.08908
5	K3	AF124383	Gnas	1	3.27908	0.801093	0.0767664	0.207025
6	K3	AF144975	Igh-VJ558	1	1.8239	1.32719	1.31141	1.71212
7	K3	AF217002	Tpcn1	1	1.90273	1.8141	1.70706	1.23229
8	K3	AF261233	Slc24a6	1	1.10867	1.70655	0.203278	0.158972
9	K3	AF263365	Rab3d	1	1.63256	1.97063	1.55726	1.5611
10	K3	AF283284	N/A	1	1.77724	1.19101	0.965667	0.601724
11	K3	AF287260	Creb3l4	1	1.61141	1.49827	1.64128	1.46645
12	K3	AF305211	Slc28a3	1	0.999113	0.958698	1.84025	1.78664
13	K3	AF351196	Dscaml1	1	1.78166	1.83022	1.20248	1.87525
14	K3	AJ007954	N/A	1	1.85094	1.89407	1.73174	1.51038
15	K3	AJ272163	Esr1	1	2.26515	1.24296	1.58828	1.50314
16	K3	AJ278735	Cabc1	1	1.09002	1.53282	1.85118	1.73805
17	K3	AJ293625	1810035L17Rik (Slirp)	1	1.74583	0.456407	0.601072	1.11498
18	K3	AK002408	Crls1	1	1.50463	2.52681	0.824009	1.61417
19	K3	AK003042	Oxt	1	1.68111	1.02169	1.29979	1.5142
20	K3	AK004394	Lrrn4cl	1	2.07855	1.01683	0.75498	0.874093
21	K3	AK004878	Coasy	1	2.47376	1.73068	1.49096	1.44411
22	K3	AK005727	1700007J24Rik	1	2.2608	1.79519	1.75056	1.56545
23	K3	AK005876	1700011L22Rik	1	1.27156	1.26549	1.35759	1.80638
24	K3	AK005902	Wdr68	1	2.21096	2.34146	0.363762	-0.136312
25	K3	AK005916	1700012J15Rik	1	0.701989	0.550989	1.669	1.12141
26	K3	AK006484	Metap1	1	2.16965	0.511208	0.681982	0.482242
27	K3	AK006553	1700030J22Rik	1	2.15204	1.5232	1.37247	1.806
28	K3	AK006942	1700072O05Rik	1	1.28935	1.53739	2.04772	1.9463
29	K3	AK007086	Tbc1d21	1	2.00781	0.999176	1.04014	0.932149
30	K3	AK007255	1700123M08Rik	1	1.36289	1.45396	1.7263	1.21121
31	K3	AK007484	Atg7	1	2.1142	0.500641	0.944186	1.32108
32	K3	AK007969	1810073G21Rik	1	1.8891	1.71626	1.02834	1.42703
33	K3	AK008023	Prss32	1	2.19344	1.64847	1.41528	1.59886
34	K3	AK008176	Myo1a	1	1.1515	2.02782	2.02482	1.40747
35	K3	AK008384	2010110K18Rik	1	1.80472	0.835765	0.971179	1.14495
36	K3	AK008577	2010317E24Rik	1	1.52689	2.22497	1.51233	0.926782
37	K3	AK008761	Tspan17	1	1.97163	1.94975	1.69601	0.705495
38	K3	AK009420	Rnf113a2	1	1.94228	1.92637	2.11968	0.662735
39	K3	AK009575	Bdh	1	1.50673	1.64132	0.961097	0.948616
40	K3	AK009722	2310040G07Rik	1	1.86359	1.5726	1.76273	1.07997
41	K3	AK010752	2410091C18Rik (Protein midA homolog, mitochondrial)	1	1.69099	0.58204	0.547166	1.1181
42	K3	AK010766	Mtif2	1	1.90906	1.94676	1.40924	1.16129
43	K3	AK010940	2510009E07Rik (UPF0524 protein C3orf70)	1	2.40916	1.587	0.732199	0.592308
44	K3	AK011694	Zfp820	1	1.1136	1.75212	1.56935	0.775153
45	K3	AK012143	Mrpl55	1	1.56277	2.24287	1.06388	1.80504
46	K3	AK012317	Snapc1	1	1.14361	1.91074	2.2937	1.45816
47	K3	AK013108	Flywch2	1	2.05141	1.57944	1.61768	1.02856
48	K3	AK013325	Fance	1	2.19659	1.36962	0.925856	0.561372
49	K3	AK013617	2900035J10Rik	1	1.30876	1.63657	1.75339	1.47475
50	K3	AK015470	4930455J16Rik	1	1.93797	1.05334	1.09767	0.951485
51	K3	AK015616	4930483K19Rik	1	1.97382	1.33151	1.05345	1.25852
52	K3	AK015631	4930486G11Rik (UPF0623 protein)	1	1.59596	1.19669	1.8651	1.67417
53	K3	AK016052	4930546H06Rik (Uncharacterized protein ENSP00000365934 homolog)	1	2.3365	1.95711	1.40482	1.56973
54	K3	AK016953	Cage1	1	1.64243	1.45341	2.03718	1.96851
55	K3	AK017247	Zfp710	1	0.926083	1.29977	1.68909	1.82234
56	K3	AK017526	Slc35d2	1	2.00377	1.23098	0.590969	-0.0827976
57	K3	AK017652	Zfp292	1	1.66044	1.4968	1.65088	0.342969
58	K3	AK017966	5830433G22Rik	1	1.94319	1.63733	1.88076	1.51586
59	K3	AK018341	B230217C12Rik	1	1.56987	2.42826	0.632649	-0.602215
60	K3	AK019055	Tulp4	1	1.08854	1.28432	2.20471	1.47501
61	K3	AK019652	4930482J15Rik	1	2.08925	1.37042	1.60638	0.725905
62	K3	AK019721	4930535L15Rik	1	1.76712	1.37982	1.23849	1.66464
63	K3	AK019729	4930540M03Rik	1	1.55928	1.55395	1.73555	0.849934
64	K3	AK020204	8030450C14Rik	1	0.796035	1.06633	1.5631	1.0575
65	K3	AK020238	8430439B09Rik	1	1.70413	2.25243	1.69838	0.603323
66	K3	AK020382	9330169L03Rik	1	1.22551	1.80453	1.4247	1.3589
67	K3	AK020861	A930015G24Rik	1	0.944613	2.48913	1.81861	1.26693
68	K3	AK021065	C030011I16Rik	1	1.94756	1.65348	1.21705	1.34234
69	K3	AY005469	Sult1c1	1	2.52669	2.54639	1.3981	-0.0521483
70	K3	BC003483	Mtss1	1	2.0932	1.90064	1.52625	1.34757
71	K3	BC003937	Epb4.1l5	1	1.43262	1.94574	1.75793	1.68261
72	K3	BC007193	C130026I21Rik	1	1.99819	1.44438	1.60875	1.42416
73	K3	BC009092	3300001P08Rik (Crop)	1	2.06233	1.91977	1.77438	1.27851
74	K3	BC009156	Arhgef18	1	2.04225	1.12468	1.23019	1.37374
75	K3	L14949	Trsp (not protein)	1	3.31213	0.846449	0.502442	0.559819
76	K3	L16948	Hk1	1	1.57974	0.984852	1.11611	0.948279
77	K3	L17335	Ggt1	1	1.19549	1.7309	1.45188	1.68348
78	K3	M18091	N/A	1	2.44394	2.38811	0.938753	-0.240793
79	K3	M23013	Trf	1	1.04188	0.862739	1.84899	1.06472
80	K3	M73551	N/A	1	0.994717	1.34859	2.03597	2.21564
81	K3	M92338	Igh-6	1	0.905483	0.866893	0.838926	1.87124
82	K3	NM_007761	Crcp	1	1.51918	1.25399	1.32952	1.70953
83	K3	NM_007786	Csn3	1	1.12701	1.64759	1.93602	1.53813
84	K3	NM_007855	Twist2	1	1.59131	0.77414	0.439781	0.786432
85	K3	NM_007898	Doc2b	1	2.27704	0.0916255	1.60381	1.97249
86	K3	NM_007962	Mpzl2	1	1.80905	1.16966	1.04774	1.20732
87	K3	NM_008107	Gdf1	1	2.17964	1.57106	1.7053	1.73693
88	K3	NM_008184	Gstm6 (Gstm5)	1	1.69575	1.04078	1.57419	1.34394
89	K3	NM_008192	Gucy2e	1	1.64865	1.53369	1.62926	1.06029
90	K3	NM_008555	Masp1	1	1.61699	1.07886	1.03864	1.03834
91	K3	NM_008635	Mtap7	1	1.4844	1.36469	1.6958	1.4302
92	K3	NM_008710	Nnt	1	2.30176	1.33676	2.05541	1.59833
93	K3	NM_008748	Dusp8	1	1.9067	1.57704	1.09825	1.61908
94	K3	NM_008796	Pctp	1	2.50648	1.6587	1.55775	1.81808
95	K3	NM_008883	Plxna3	1	0.834196	0.885803	1.71024	1.41193
96	K3	NM_009043	Reg2	1	1.41306	1.53612	1.86683	1.35154
97	K3	NM_009261	Strbp	1	0.620273	1.42272	1.46317	1.66071
98	K3	NM_009344	Phlda1	1	1.55606	1.71898	1.86476	1.94473
99	K3	NM_009720	Atox1	1	1.36375	1.99843	1.82267	1.73041
100	K3	NM_009914	Ccr3	1	1.80081	0.66225	1.16968	1.13378
101	K3	NM_010157	Esr2	1	1.85397	1.66226	1.77124	1.31086
102	K3	NM_010232	Fmo5	1	1.91735	0.513943	0.599797	1.20838
103	K3	NM_010423	Hey1	1	1.7754	1.91768	1.07885	1.41498
104	K3	NM_010769	Matn1	1	1.7409	1.16405	0.965765	0.969943
105	K3	NM_011069	Pex11b	1	0.764251	1.7131	1.3391	1.5831
106	K3	NM_011624	Top3b	1	2.1574	2.66086	1.00302	-0.224691
107	K3	NM_011648	Tshr	1	1.60064	2.01547	1.63964	1.55449
108	K3	NM_011922	Anxa10	1	1.73233	0.520558	0.280719	0.930516
109	K3	NM_013754	Insl6	1	1.31208	2.12606	1.73585	1.00596
110	K3	NM_016673	Cntfr	1	2.70694	1.49186	1.4687	1.12017
111	K3	NM_016722	Galns	1	1.76145	0.239741	0.554182	1.03767
112	K3	NM_016801	Stx1a	1	1.15843	1.4591	1.85918	1.34589
113	K3	NM_019439	Gabbr1	1	1.55377	2.72104	1.62321	0.784966
114	K3	NM_019454	Dll4	1	1.85039	1.49041	1.3083	1.47013
115	K3	NM_019513	Car5b	1	2.00058	0.671951	0.482962	1.34264
116	K3	NM_019579	Mpp5	1	1.64008	0.807003	0.628654	0.666601
117	K3	NM_019693	Bat1a	1	1.56644	1.03787	1.33244	1.05569
118	K3	NM_019728	Defb4	1	1.3853	1.92338	1.35418	1.62641
119	K3	NM_019946	Mgst1	1	0.753492	1.63362	1.80935	1.60222
120	K3	NM_019956	Krt71	1	0.827145	1.80643	1.19048	1.56809
121	K3	NM_020005	Pcaf	1	1.50814	1.94733	1.76611	1.41778
122	K3	NM_020026	B3galnt1	1	1.79663	1.69798	1.55044	1.75345
123	K3	NM_021327	Tnip1	1	1.66754	1.70913	1.85891	1.67825
124	K3	NM_021386	Cldn10	1	1.61463	0.849437	1.05165	0.84129
125	K3	NM_025594	Zmat2	1	1.96938	1.44081	1.48062	1.59629
126	K3	NM_025605	2400001E08Rik	1	1.79458	0.904527	1.22876	1.65052
127	K3	NM_025987	Ndufa6	1	1.6449	0.970931	1.44473	1.4466
128	K3	NM_026310	Mrpl18	1	2.0581	2.20876	1.31998	1.0872
129	K3	NM_028120	Ccdc123	1	1.44153	2.13172	1.46331	1.25532
130	K3	NM_028146	Dbndd1	1	1.66204	1.68076	1.05874	0.956171
131	K3	S58460	N/A	1	1.07848	1.83088	1.29011	1.69777
132	K3	S74697	Span (Ms4a6d)	1	1.13136	1.51768	1.94719	1.98844
133	K3	U05672	Adora2a	1	1.41795	2.38585	1.70347	0.388729
134	K3	U51457	Igh-VS107	1	1.25625	1.73006	1.45796	0.809073
135	K3	U55455	Igh-6	1	1.61697	1.26282	1.83738	1.31946
136	K3	U55540	Igh-6	1	1.93352	1.42169	0.788779	1.04266
137	K3	U89415	Eef2	1	1.56896	1.86736	1.34262	1.39013
138	K3	U89889	Hpx	1	1.07194	1.75907	2.17794	1.36052
139	K3	U94423	Mef2a	1	1.96689	1.46607	1.3516	0.995131
140	K3	X04211	N/A	1	1.01493	1.49507	1.86065	2.54251
141	K3	X04231	N/A	1	1.16418	0.822729	1.60077	1.62728
142	K3	X65704	Snrpe	1	1.86691	1.90345	1.42078	1.56166
143	K3	X76684	Foxa1	1	1.61676	2.36133	1.03795	2.05667
144	K3	Y10969	RGD1311093 (5430433E21Rik)	1	2.20687	0.673557	1.30745	1.8521
145	K3	Y11896	Chic1	1	1.87425	1.54737	1.28981	1.35931
146	K3	Z12176	Tcrb-V13	1	1.85873	1.59859	1.77042	1.21159
147	K3	Z12376	N/A	1	0.969816	1.12788	1.718	1.56525
148	K3	Z12453	N/A	1	1.11502	1.20345	1.72029	1.2224
149	K3	Z22142	Igh-6	1	1.03229	1.21368	1.10481	1.50506
-	K3	Average profile			1.66406	1.49258	1.39092	1.26426
	K3	Trajectory profile signature			2	1	1	1

## Sheet: Table S5-K3
Number	Flag	Gene		Gweight	Developmental stage
		NCBI ID	Official Symbol		P5	P14	L1	L12
1	K2	AB043424	N/A	1	0.259462	0.66598	2.05303	2.19533
2	K2	AB049967	Igk-V8	1	-0.701896	2.74457	2.74672	2.42433
3	K2	AB054000	1110028A07Rik (Fit1)	1	-1.19763	1.39516	2.1594	2.17463
4	K2	AB054591	Pip5k2c	1	-0.830899	2.37519	3.23779	3.23299
5	K2	AF000918	N/A	1	0.0781566	0.163364	1.74977	1.67532
6	K2	AF059702	N/A	1	0.36067	1.77341	1.57935	1.98163
7	K2	AF062757	N/A	1	-0.561331	1.22022	2.22219	3.03169
8	K2	AF093554	N/A	1	-0.856829	1.52673	2.26314	2.69237
9	K2	AF133818	Zranb2	1	0.298391	3.04832	2.15281	2.29925
10	K2	AF154337	Gpr137b	1	-1.01518	1.7875	2.76506	3.37309
11	K2	AF163744	N/A	1	-0.398051	1.18523	1.27186	2.14456
12	K2	AF197136	BC017612 (UPF0443 protein C11orf75 (Protein FN5))	1	-0.327195	0.171502	1.19554	1.59959
13	K2	AF224494	Zfand2a	1	-0.524738	1.01243	1.44094	1.54362
14	K2	AF247663	Hoxa6	1	0.689322	0.735248	1.69173	2.10352
15	K2	AF284437	Il1rapl2	1	-1.16652	0.805347	2.06251	2.93759
16	K2	AF387322	Rbm9	1	0.138451	1.14291	1.61231	1.30549
17	K2	AJ278073	N/A	1	-0.639716	1.47229	2.32239	2.92954
18	K2	AK002805	0610038L08Rik	1	-0.49236	1.274	2.99021	2.48258
19	K2	AK003015	0710007G10Rik	1	-1.10738	3.23155	2.57198	2.7666
20	K2	AK003605	Hhatl	1	-1.42316	-0.106756	1.45118	1.81052
21	K2	AK003898	Ube2v2	1	0.452193	0.694331	0.747119	1.77364
22	K2	AK004375	Abhd13	1	0.593831	2.3657	1.3663	2.51417
23	K2	AK004522	Ndufb9	1	-0.457156	0.489537	1.59473	2.10911
24	K2	AK004757	Stk11ip	1	-0.894433	0.00831712	0.702195	1.88941
25	K2	AK004971	Ugt2b1	1	-0.610519	0.860035	1.00146	1.62482
26	K2	AK005293	Phyhd1	1	0.778919	0.862834	1.66518	1.80312
27	K2	AK005692	1700007B13Rik (Pdilt)	1	-0.0321099	1.34815	1.94262	1.7688
28	K2	AK005702	1700007E06Rik	1	0.329374	0.370488	1.51093	1.75308
29	K2	AK005737	N/A	1	-0.124087	1.45914	1.9884	1.93912
30	K2	AK005813	1700010B13Rik	1	-0.248595	0.152915	2.26956	1.89118
31	K2	AK005994	1700015G11Rik	1	0.316457	1.28079	1.71638	2.12935
32	K2	AK006325	1700025C18Rik	1	-1.09471	0.950094	1.56972	2.11338
33	K2	AK006719	1700047N06Rik	1	-0.440891	0.267369	0.582019	1.7435
34	K2	AK006833	1700058M10Rik	1	0.262862	0.348807	1.32523	2.21418
35	K2	AK006850	1700061D14Rik	1	-0.399774	0.770037	2.6312	2.60839
36	K2	AK006916	Spata18	1	-0.623039	1.73953	2.6027	2.02494
37	K2	AK006961	1700081B01Rik	1	-1.35953	0.712142	2.17766	1.97365
38	K2	AK006997	1700084M14Rik	1	-0.388829	0.160398	1.1383	2.009
39	K2	AK007195	1700113H08Rik	1	-0.101957	2.06571	2.22616	1.83799
40	K2	AK007248	1700123E06Rik	1	-0.141084	1.99677	2.03147	1.86425
41	K2	AK007908	Camta1	1	-1.14986	0.53997	2.33932	2.95206
42	K2	AK009013	2300002M23Rik	1	0.0558392	2.64371	3.31233	3.24221
43	K2	AK009878	Txndc15	1	-0.367687	0.145247	0.965557	2.42584
44	K2	AK011126	Lsm12	1	-0.339933	2.07462	2.39873	2.93426
45	K2	AK011684	2610035F20Rik	1	-1.09302	3.02541	3.01099	2.78951
46	K2	AK011866	2610203C22Rik	1	-0.322895	0.785398	0.949202	1.77482
47	K2	AK011923	2610208K16Rik	1	-0.168367	2.38808	3.12437	3.13554
48	K2	AK012079	Atad2	1	-0.808055	0.372385	1.74293	2.71705
49	K2	AK012980	Tbx18	1	-0.513509	0.326383	1.40262	2.32673
50	K2	AK013379	Mctp1	1	-0.33346	2.53395	2.51191	2.50568
51	K2	AK013764	2900072D07Rik	1	0.701142	2.86152	3.09646	2.45436
52	K2	AK013958	3110001L01Rik	1	-0.436014	1.69393	2.30458	1.96928
53	K2	AK014626	Kcnk16	1	0.212245	1.01378	2.2081	1.8839
54	K2	AK014828	4921506M07Rik	1	-0.541769	1.65412	2.57161	1.94881
55	K2	AK014939	Ints10	1	0.785435	1.06373	2.17041	2.27563
56	K2	AK015066	4930403L11Rik	1	-0.637179	0.459337	1.16798	1.9147
57	K2	AK015453	4930453J04Rik	1	-0.618955	0.811718	1.51766	1.73957
58	K2	AK015504	2900005J15Rik	1	0.0196001	0.580914	0.8367	1.53727
59	K2	AK015613	4930483C13Rik	1	-0.716408	-0.424145	0.84022	1.84572
60	K2	AK015632	4930486I03Rik	1	-1.27333	1.57651	3.05546	2.90135
61	K2	AK015773	1700025F24Rik	1	-0.256388	2.09228	2.45143	1.96421
62	K2	AK015902	4930526H09Rik	1	-0.715361	2.01024	2.679	3.27036
63	K2	AK016678	Als2cr12	1	-1.23355	-0.319604	1.66516	2.01656
64	K2	AK016810	4933413N12Rik	1	-0.602994	-0.132654	1.76009	1.39482
65	K2	AK017182	5033421C21Rik	1	-0.382624	1.72146	2.2648	2.3318
66	K2	AK017198	Tmem188	1	-0.25532	1.52806	2.21298	2.46149
67	K2	AK017289	5430410E06Rik	1	-1.35424	2.77225	3.22196	2.48642
68	K2	AK017442	Krtap2-4	1	-1.04762	1.49978	1.2129	2.48386
69	K2	AK017448	Wrb	1	-0.0245828	0.832828	1.57191	2.10548
70	K2	AK017968	5830433M15Rik	1	0.662662	1.76552	1.72514	2.11384
71	K2	AK017972	5830436C15Rik	1	-0.423044	0.783597	1.88234	1.77818
72	K2	AK018096	Ccdc138	1	-1.19474	1.82559	2.14563	2.46558
73	K2	AK018160	March3	1	-0.458784	0.954733	2.09592	1.84831
74	K2	AK018741	0610011L14Rik	1	0.354621	1.69661	1.45634	2.01831
75	K2	AK018872	1700063I16Rik	1	-0.921629	1.5127	2.66044	2.00408
76	K2	AK018948	1700112J05Rik	1	-0.0830744	1.15599	2.6155	1.80165
77	K2	AK019108	2210404J11Rik	1	-0.134195	1.28053	1.79277	1.82788
78	K2	AK019328	2900037P16Rik	1	0.0535171	1.68087	2.60342	1.86624
79	K2	AK019494	Plb1	1	0.325542	2.51837	2.43845	2.09095
80	K2	AK019746	4930546K05Rik	1	-0.486913	0.58944	1.89281	1.80834
81	K2	AK020111	6720418B01Rik	1	-1.38807	3.45878	3.44881	3.28163
82	K2	AK020591	Centb2	1	-0.494078	1.16683	1.78588	1.98353
83	K2	AK020918	A930032L01Rik	1	-0.714395	2.27003	2.02726	2.18408
84	K2	AK021087	C030017B01Rik	1	-1.24189	2.83253	3.64468	4.11931
85	K2	AK021269	C530007A02Rik	1	-1.39204	0.778627	2.02239	2.63978
86	K2	AY033771	Akap13	1	-1.32591	2.60222	3.81996	2.83525
87	K2	AY036886	Mll3	1	0.0289683	1.72989	2.25949	1.65318
88	K2	BC003224	Rcbtb2	1	-0.934781	1.4323	2.27623	1.50164
89	K2	BC003491	Hdhd3	1	-0.59519	0.841602	1.54125	1.89983
90	K2	BC004837	Nat15	1	-0.539498	1.39893	1.84538	1.70561
91	K2	BC005755	Wdr77	1	-0.461514	1.03977	1.69843	2.50148
92	K2	BC006631	Numa1	1	-1.29037	2.20454	2.75163	1.88399
93	K2	BC006835	Gigyf2	1	-1.56186	3.2345	4.11247	3.91284
94	K2	BC008638	Dars	1	-0.119416	2.28044	2.69561	2.80833
95	K2	BC010981	BC010981	1	-1.1709	1.44045	2.32913	1.8509
96	K2	BC011162	Ncald	1	-0.782873	1.00713	2.3554	2.2978
97	K2	BC015290	Ces2	1	0.430632	1.34482	1.25797	2.93182
98	K2	D29926	Igk-V	1	-0.643284	1.90345	2.04491	1.48529
99	K2	D31768	Amelx	1	-1.18471	1.39414	2.25793	2.4275
100	K2	D45850	Akr1c6	1	-0.00203885	1.32055	2.05911	1.60437
101	K2	J04761	Ubl4 / Slc10a3	1	-0.673745	0.464014	1.70813	1.83156
102	K2	L05518	N/A	1	-0.0608833	1.77437	2.90936	2.91678
103	K2	L19609	N/A	1	0.410241	0.304757	1.16596	1.80273
104	K2	L23316	Gpsm1	1	-0.493051	0.0870386	1.788	1.58891
105	K2	M16162	Igk-V23	1	-0.630324	1.93825	2.95444	1.96237
106	K2	M17954	Gm1499	1	-0.0541933	0.681007	1.14247	2.15574
107	K2	M18613	Klk1b14-ps	1	-0.261108	0.682796	1.12887	2.18945
108	K2	M23016	Trf	1	0.72374	0.701145	2.02485	1.46907
109	K2	M37009	Igh-6	1	-0.781174	0.580272	1.86455	2.2577
110	K2	M57991	N/A	1	-0.450295	1.86477	2.59053	2.45835
111	K2	M63673	N/A	1	-0.792365	2.38603	2.91071	1.92224
112	K2	M92400	N/A	1	-1.29229	1.96848	3.05899	3.76443
113	K2	M94020	N/A	1	-0.143273	2.1464	3.61346	3.71396
114	K2	NM_007423	Afp	1	-0.495108	0.0621082	0.915668	2.47756
115	K2	NM_007548	Prdm1	1	-0.619332	0.951474	1.72179	1.72776
116	K2	NM_007680	Ephb6	1	-0.323058	1.4444	2.49013	2.6129
117	K2	NM_007754	Cpd	1	0.128028	2.14105	2.90927	3.32222
118	K2	NM_007770	Crx	1	0.357502	1.95284	2.36157	1.91732
119	K2	NM_007784	Csn1s1	1	-1.7106	2.82667	4.09255	4.19375
120	K2	NM_007785	Csn1s2a	1	-0.440552	1.00707	2.84642	2.6032
121	K2	NM_007990	Fau	1	-0.927382	1.25554	1.98318	1.90285
122	K2	NM_008040	Fpr-rs3	1	-0.0746658	1.53627	1.95444	1.85517
123	K2	NM_008095	Gbas	1	-1.33765	2.99598	3.79603	3.53652
124	K2	NM_008305	Hspg2	1	0.205437	2.21824	3.33551	3.22516
125	K2	NM_008397	Itga6	1	-0.453097	0.670278	1.77504	2.20685
126	K2	NM_008611	Mmp8	1	-0.994689	1.51451	2.69505	2.17277
127	K2	NM_008765	Orc2l	1	0.705741	1.5211	2.75879	2.85173
128	K2	NM_009046	Relb	1	-0.426408	3.70491	3.83052	4.03939
129	K2	NM_009369	Tgfbi	1	-0.00041321	1.82672	2.00403	2.01238
130	K2	NM_009633	Adra2b	1	-0.868188	1.6871	2.23627	2.43646
131	K2	NM_009696	Apoe	1	0.244862	2.69124	2.68705	2.97967
132	K2	NM_009699	Aqp2	1	-0.259203	1.07275	2.3119	3.25164
133	K2	NM_009972	Csn2	1	-1.62781	4.32257	3.89228	4.00553
134	K2	NM_010248	Gab2	1	-0.693011	0.842177	2.02494	1.99273
135	K2	NM_010296	Gli	1	-1.03372	0.99728	1.76734	1.50003
136	K2	NM_010597	Kcnab1	1	-1.48784	3.25501	4.20087	1.14675
137	K2	NM_011139	Pou2f3	1	-0.239271	0.147351	1.04816	1.81795
138	K2	NM_011488	Stat5a	1	-0.993792	0.277832	1.72773	1.89187
139	K2	NM_011709	Wap (WFDC5)	1	-0.726317	0.5569	3.26457	3.8234
140	K2	NM_011795	C1ql1	1	0.995222	1.5402	2.8986	2.76984
141	K2	NM_011873	Dazap2	1	-0.419442	2.02668	2.64927	2.24945
142	K2	NM_013629	Phtf1	1	0.528926	1.05625	2.16396	2.1515
143	K2	NM_013630	Pkd1	1	0.326519	1.80363	2.09955	2.05632
144	K2	NM_015731	Atp9a	1	-0.849411	1.69285	2.57085	2.4418
145	K2	NM_015802	Dlc1	1	0.278422	1.30494	1.68978	2.53849
146	K2	NM_016798	Pdlim3	1	-0.305444	2.5819	3.25217	2.76022
147	K2	NM_016914	Prg3	1	-0.992467	0.736964	1.50472	1.82856
148	K2	NM_017465	Sult2b1	1	-0.312711	1.89361	2.58633	2.21341
149	K2	NM_020501	Tas2r105	1	0.00540853	0.782101	1.3618	1.81363
150	K2	NM_021275	Kcna4	1	-0.471314	1.24152	2.29795	2.07858
151	K2	NM_021396	Pdcd1lg2	1	-0.574864	0.191653	1.58218	2.34933
152	K2	NM_023120	Gnb1l	1	-0.0625023	0.554063	2.14899	2.02356
153	K2	NM_023907	Foxi1	1	-0.24714	0.433268	2.6692	2.6486
154	K2	NM_025308	1810007E14Rik	1	-0.427589	0.772967	2.01268	2.50072
155	K2	NM_025369	Mrps36	1	-0.293547	0.429147	1.81444	2.80263
156	K2	NM_025384	Dnajc15	1	0.19081	0.619911	1.3465	1.8433
157	K2	NM_025545	Aptx	1	-1.15923	1.35274	2.7942	2.23535
158	K2	NM_025888	Kctd20	1	-0.574353	0.692419	1.19565	2.29533
159	K2	NM_026021	Zmynd19	1	0.398243	0.729022	0.957309	1.60683
160	K2	NM_026506	Snrpg	1	-0.100131	0.379383	0.711099	1.71666
161	K2	NM_030553	Olfr160	1	-1.27652	3.26344	3.10287	4.12338
162	K2	NM_031404	Actl6	1	-0.66955	0.759309	1.42436	2.01065
163	K2	S59139	N/A	1	-1.23518	1.35218	1.97179	1.84888
164	K2	S72513	Igh-6	1	0.67355	0.64188	0.669814	2.15917
165	K2	U01314	Igk-V1	1	0.727844	1.04709	1.85034	1.94796
166	K2	U09591	N/A	1	-0.11904	1.00127	1.83854	2.24784
167	K2	X16223	H2-T24	1	0.157259	0.031089	1.82674	2.33114
168	K2	X16496	Hist1h3g	1	1.71598	3.61863	4.05196	3.84115
169	K2	X17173	N/A	1	-0.564647	2.42373	2.97084	2.11532
170	K2	X53402	Aldob	1	-0.833964	1.39353	2.39505	2.35941
171	K2	X58835	Igh-1a	1	0.703252	1.043	1.41359	1.85301
172	K2	X65980	Mylc2pl	1	0.0761932	4.11659	4.18383	2.22889
173	K2	X66656	N/A	1	-0.636211	2.05414	3.04608	3.04794
174	K2	Z25735	Pou2f2	1	-0.686217	2.04303	3.79772	3.82194
175	K2	Z33491	N/A	1	-0.131293	1.45097	2.22108	3.11697
-	K2	Average profile			-0.40071	1.39972	2.17787	2.32488
		Trajectory profile signature			1	1	2	2

## Sheet: Table S5-K4
Number	Flag	Gene		Gweight	Developmental stage
		NCBI ID	Official Symbol		P5	P14	L1	L12
1	K6	AK002981	Ankrd13d	1	-1.06821	0.856368	2.28701	-0.221636
2	K6	AK003217	Txndc4	1	-0.500184	1.19586	2.20029	0.843054
3	K6	AK009512	2310026L22Rik	1	-0.180358	0.895527	2.12226	-0.0970119
4	K6	AK010741	2410085M17Rik	1	-0.919473	0.839083	2.12188	0.447457
5	K6	AK013819	2900084I15Rik	1	-0.142767	0.165873	2.4965	-0.213442
6	K6	AK014101	Usp42	1	-0.935071	0.971186	1.64854	0.751087
7	K6	AK014808	4921522E24Rik	1	-0.804167	1.29172	2.6313	-0.204996
8	K6	AK015922	4930528A17Rik	1	-1.05432	1.32075	2.25421	0.856258
9	K6	AK018070	Lpo	1	-0.868521	2.06091	2.90572	0.919762
10	K6	BC005708	2610018G03Rik (Mst4)	1	-1.30705	1.93447	3.03229	-0.410999
11	K6	M12052	Cd8a	1	-0.121319	0.518297	1.88107	0.554288
12	K6	NM_008718	Npas1	1	-0.386251	0.954838	2.5148	0.154104
13	K6	NM_009175	St6gal1	1	-0.994597	2.56794	3.73331	0.273682
14	K6	NM_010287	Gpr83	1	-0.926031	1.86225	3.69999	-0.0360015
15	K6	NM_010556	Il3	1	-0.435127	2.03441	2.7848	0.781349
16	K6	NM_010570	Irs1	1	-0.149402	2.121	2.96141	0.247561
17	K6	NM_011561	Tdg	1	-0.749655	0.887596	2.03941	-0.908311
18	K6	NM_011964	Psg19	1	-0.398218	1.29967	2.34833	-0.0428214
19	K6	NM_013788	Peg12	1	-0.659498	1.51848	2.73001	0.0566679
20	K6	NM_021542	Kcnk5	1	0.220821	1.45013	2.19857	-0.23067
21	K6	NM_025415	Cks2	1	-0.229558	0.523903	1.53786	0.0127596
22	K6	NM_026247	Alg13	1	-0.369434	1.33842	2.26993	0.930368
23	K6	NM_027137	Sprrl7	1	-0.323929	1.94867	2.12736	-0.300027
24	K6	U09054	Ube1y1-ps2	1	-0.0698972	1.62529	1.84975	0.959077
-	K6	Average profile			-0.534957	1.36201	2.43868	0.232313
	K6	Trajectory profile signature			1	1	2	1

## Sheet: Table S5-K5
Number	Flag	Gene		Gweight	Developmental stage
		NCBI ID	Official Symbol		P5	P14	L1	L12
1	K4	AB010325	Zfp9	1	-0.212431	-0.752299	-1.58295	-1.7565
2	K4	AB010358	Zfp317	1	-0.58439	-0.472182	-1.37056	-2.19462
3	K4	AB026997	Cast	1	-0.555233	-0.911766	-1.6144	-1.72165
4	K4	AF011414	Vmn2r42	1	-0.975104	-0.803844	-1.48665	-2.07024
5	K4	AF016710	N/A	1	-0.63161	-0.566152	-1.52754	-2.29762
6	K4	AF119148	Flnc	1	-0.644595	-0.546327	-1.27329	-1.63661
7	K4	AF120319	N/A	1	-0.608538	-0.471086	0.14269	-2.2976
8	K4	AF176516	Polr2f	1	-0.772741	-0.818313	-1.36753	-1.55868
9	K4	AF176528	Fbxw14	1	-0.690837	-1.03767	-1.56677	-1.77978
10	K4	AF251268	Slc5a4b	1	-1.09737	-0.560991	-1.62152	-1.92475
11	K4	AF254422	Pax7	1	-1.14883	-0.513122	-0.848549	-1.73167
12	K4	AF295402	Scamp2	1	-1.20724	-0.739315	-0.312915	-2.44416
13	K4	AF303831	Rdh14	1	-0.69671	0.196535	0.0254616	-1.85508
14	K4	AF312924	Ralgps2	1	-0.938057	-1.00766	-1.54023	-2.21374
15	K4	AF357458	N/A	1	-0.800454	-0.890709	-1.35032	-1.86861
16	K4	AF408400	Ppp1r14d	1	-0.910265	-0.446782	-1.68652	-2.256
17	K4	AJ278123	Synpo	1	-0.443896	-0.805717	-1.50174	-1.65042
18	K4	AK003996	Klk5	1	-0.866044	-0.947368	-1.56725	-2.23676
19	K4	AK004309	Rab3gap2	1	-0.625318	-0.947533	-1.51839	-1.90894
20	K4	AK005212	Sdccag1	1	-0.801348	-0.841807	-1.00686	-1.76398
21	K4	AK005338	Snx15	1	-0.690835	-0.856634	-1.34111	-1.64727
22	K4	AK005677	1700006H21Rik	1	-1.04229	-0.852819	-0.949545	-1.82146
23	K4	AK006064	1700017G19Rik	1	-0.587864	-0.883812	-1.50302	-1.75717
24	K4	AK006223	1700021N20Rik	1	-0.891096	0.571643	-0.529165	-2.27456
25	K4	AK006597	1700034J04Rik	1	-0.826245	-0.437453	-1.37449	-2.07586
26	K4	AK006651	1700040D17Rik	1	-1.23503	-0.76993	-0.931299	-1.79834
27	K4	AK006729	1700048J15Rik	1	-0.846589	-0.957663	-1.3528	-1.77065
28	K4	AK007091	Loxhd1	1	-1.1777	-0.34848	-1.63988	-2.22167
29	K4	AK007300	1700127G19Rik	1	-0.266899	-0.857072	-0.642327	-1.66531
30	K4	AK007483	Nradd	1	-0.601746	-1.39317	-1.48725	-2.4592
31	K4	AK007894	Ndufaf2	1	-0.723108	-0.936016	-1.37565	-1.65939
32	K4	AK008108	Sulf2	1	-0.94267	-0.299983	-1.09914	-1.62094
33	K4	AK008972	Golga1	1	-0.76312	-0.419237	-0.934811	-1.77624
34	K4	AK009063	Trak1	1	-0.755835	-0.720466	-1.70095	-2.25199
35	K4	AK009505	Slamf9	1	-0.826337	-0.635613	-1.61715	-1.34733
36	K4	AK010976	2510017J16Rik	1	-0.945092	-0.198697	-1.60567	-2.23603
37	K4	AK011250	2610001A08Rik	1	-0.601226	-0.583145	-1.34891	-1.64366
38	K4	AK011318	2610005G05Rik	1	-1.09721	-0.760877	-1.5678	-2.06372
39	K4	AK013356	Zfp839	1	-0.869908	-0.777332	-1.33775	-1.77133
40	K4	AK013412	Ccdc137	1	-0.997276	-0.266976	-1.45724	-1.88067
41	K4	AK013491	Macrod2	1	-0.476549	-0.354431	-0.9049	-1.88412
42	K4	AK014404	3732407C23Rik	1	-0.32163	0.0282398	-0.903565	-1.72973
43	K4	AK014624	Depdc6	1	-0.985367	-0.759558	-1.35101	-1.60621
44	K4	AK014953	4921523P09Rik	1	-1.29453	-0.326525	-0.946286	-1.95966
45	K4	AK015569	4930425L21Rik	1	-0.958541	-0.793956	-1.24045	-1.70717
46	K4	AK015647	4930488L21Rik	1	-0.344468	-0.154515	-1.36713	-1.87534
47	K4	AK015653	4930500A05Rik	1	-1.103	-0.728595	-1.93618	-2.1503
48	K4	AK015702	4930505G20Rik	1	-1.02465	-0.910756	-1.49715	-1.99435
49	K4	AK016153	4930556N13Rik	1	-0.799868	-0.610101	-1.57934	-1.57482
50	K4	AK016413	4930599A14Rik	1	-0.257185	-1.54897	-1.41332	-1.87018
51	K4	AK016539	4932431P20Rik	1	-0.753328	-0.242309	-1.26115	-1.64847
52	K4	AK017319	5430419D17Rik (putative DMBT1-like protein)	1	-0.682068	-0.939301	-1.46021	-1.9707
53	K4	AK017578	Nrxn1	1	-0.303841	-0.8322	-1.02965	-1.55481
54	K4	AK018414	8430415E04Rik (Kiaa1622 (Pp4r4) (Ppp4r4))	1	-1.19723	-0.785712	0.541126	-1.74801
55	K4	AK018900	1700080C20Rik	1	-0.535097	-0.937923	-1.36919	-1.85627
56	K4	AK019480	Fam122b	1	-0.803332	-1.07986	-1.4383	-1.86041
57	K4	AK020211	8030459D09Rik	1	-0.728781	-0.835773	-0.945237	-1.7882
58	K4	AK020584	9530034A14Rik	1	-0.376748	-0.835627	-1.06404	-1.70284
59	K4	AK020752	Tmem86b	1	-0.93298	-0.714681	-1.82629	-1.73101
60	K4	AK020870	Zbtb20	1	-0.540623	-0.685006	-1.15634	-2.02918
61	K4	AK020947	A930040O22Rik	1	-0.752968	-0.987158	-1.30129	-1.69751
62	K4	AK021303	D530031A16Rik	1	-0.704379	0.0586363	-1.19574	-2.32125
63	K4	BC011152	Golm1	1	-0.80882	-0.547389	-1.11403	-2.02028
64	K4	BC011321	Ddx27	1	-0.808142	-0.800319	-1.13122	-1.66805
65	K4	BC014818	Ndufv1	1	-0.857675	-0.761123	-1.60128	-2.1391
66	K4	BE571810	Sva / Sca2 (Atxn2)	1	-0.825797	-0.0696292	-1.37756	-3.37785
67	K4	BF141398	Abcd1	1	-0.716235	-0.84602	-1.60092	-1.96806
68	K4	BF163506	Gsto1	1	-1.04484	-0.738691	-1.46145	-3.01889
69	K4	BF164689	Tcirg1	1	0.273467	-0.0805156	-1.22996	-1.99084
70	K4	BF540497	Jund	1	-0.895983	-0.443763	-1.2284	-1.95383
71	K4	L02346	Igh-6	1	-0.967203	-0.605763	-1.56928	-2.35189
72	K4	M18620	Klk2-ps	1	-0.586654	-1.05881	-1.28808	-1.69559
73	K4	M24786	N/A	1	-0.707119	-0.360848	-1.32474	-1.53324
74	K4	M32070	Rarg	1	-0.462045	-0.626622	-1.15976	-1.8283
75	K4	M57960	Es1	1	-0.75397	-0.457965	-1.31339	-1.6239
76	K4	NM_007643	Cd36	1	-1.15043	-0.330704	-0.895981	-1.64716
77	K4	NM_007948	Ercc1	1	-0.388081	-1.06299	-1.93805	-1.7242
78	K4	NM_008076	Gabrr2	1	-0.491069	-0.469164	-0.823221	-1.75836
79	K4	NM_008105	Gcnt2	1	-0.56134	-0.227571	-1.14689	-1.82392
80	K4	NM_008223	Serpind1	1	-0.991655	-0.849451	-1.54927	-2.00684
81	K4	NM_008330	Ifi47	1	-0.855596	-0.770451	-1.15475	-1.75623
82	K4	NM_008453	Klf3	1	-0.973301	-0.603562	-1.15292	-1.88429
83	K4	NM_008667	Nab1	1	-0.952565	-0.375208	-1.0971	-2.15796
84	K4	NM_008792	Pcsk2	1	-0.716992	-0.18935	-0.310076	-1.72257
85	K4	NM_008876	Pld2	1	-0.462675	-0.775009	-1.26639	-1.77542
86	K4	NM_008899	Pou3f2	1	-0.715349	-0.26978	-1.28234	-2.29853
87	K4	NM_008975	Ptp4a3	1	-0.62386	-0.784517	-1.55045	-1.98142
88	K4	NM_009071	Rock1	1	-0.929097	-0.734992	-1.12395	-1.66391
89	K4	NM_009177	St3gal1	1	-1.0846	-0.678597	-1.05087	-2.24938
90	K4	NM_009579	Slc30a1	1	-0.791552	-1.06928	-1.46097	-1.82828
91	K4	NM_009840	Cct8	1	-1.10593	-0.417531	-1.37921	-1.69735
92	K4	NM_010323	Gnrhr	1	-0.929247	-0.595289	-1.53925	-1.90124
93	K4	NM_010582	Itih2	1	-0.601069	-1.10892	-1.33392	-2.07067
94	K4	NM_010649	Klra4	1	-0.453567	-0.876643	-1.9248	-1.87007
95	K4	NM_010935	Npy6r	1	-1.153	-0.854536	-0.41673	-1.77289
96	K4	NM_011372	St6galnac3	1	-0.633387	-0.473168	-1.42197	-2.18446
97	K4	NM_012034	Tpsg1	1	-0.636104	-0.930967	-1.57131	-1.4552
98	K4	NM_013671	Sod2	1	-0.169432	-0.462272	-1.15312	-1.81928
99	K4	NM_013770	Slc25a10	1	-0.875499	-0.585507	-1.61384	-2.55981
100	K4	NM_013926	Cbx8	1	0.163129	-0.966287	-1.78643	-1.59223
101	K4	NM_019420	B3galt4	1	-0.922056	-0.924027	-1.21529	-1.6213
102	K4	NM_019441	Ppt2	1	-0.771157	-0.603457	-1.20332	-1.57012
103	K4	NM_019667	Stam2	1	-0.342912	-0.281581	-1.42981	-2.13157
104	K4	NM_019689	Arid3b	1	-1.57868	-0.575806	-1.11519	-2.90077
105	K4	NM_023557	Slc44a4	1	-0.610153	-0.632509	-1.12768	-2.30725
106	K4	NM_024194	Lrrc40	1	-0.820469	-1.01862	-0.514906	-1.53932
107	K4	NM_025827	Lonp2	1	-1.14348	-0.763532	-1.07593	-1.7151
108	K4	NM_026330	Nsmce1	1	-0.682751	-0.733294	-1.0062	-1.67517
109	K4	NM_026670	Zmym1	1	-0.802981	-0.802993	-1.68606	-1.91526
110	K4	NM_026819	Dhrs1	1	-0.733558	-0.474905	-1.16653	-2.082
111	K4	U06662	Ofa	1	-1.04565	-0.950943	-1.27035	-1.99586
112	K4	U29508	Zfp72 (Zfp74)	1	0.0223141	-0.265828	-0.753904	-1.84209
113	K4	U69898	Timm44	1	-0.877433	-0.571277	-1.78765	-2.19234
114	K4	U96701	Spi15	1	-0.933779	-0.913331	-1.59368	-2.01774
115	K4	X03766	Acta1	1	-1.07035	-0.831151	-1.27671	-2.18861
116	K4	X56574	Rarb	1	-0.273385	-0.593489	-1.5537	-1.73117
117	K4	X57277	Rac1	1	-0.253974	-0.235245	-1.07911	-1.53245
118	K4	X81633	Spag5	1	-0.452402	-0.667249	-0.968	-1.64038
119	K4	X81718	Tmem97	1	0.174734	-0.151823	-1.02923	-1.73236
-	K4	Average profile			-0.745129	-0.646965	-1.25112	-1.91624
	K4	Trajectory profile signature			1	1	1	0

## Sheet: Table S5-K6
Number	Flag	Gene		Gweight	Developmental stage
		NCBI ID	Official Symbol		P5	P14	L1	L12
1	K5	AB001737	Igk-V8	1	2.2449	2.35368	1.74241	1.31189
2	K5	AB030201	Tmem205	1	2.75691	2.43701	1.85001	1.65278
3	K5	AB063319	Rian (not protein)	1	1.23779	2.21094	2.29884	1.61904
4	K5	AF023243	Igh-6	1	2.05925	2.69731	2.64049	2.23169
5	K5	AF041973	N/A	1	1.93145	2.40241	1.76981	2.15904
6	K5	AF068182	Blnk	1	1.7912	2.7898	2.369	1.67035
7	K5	AF073933	N/A	1	1.7981	2.17504	2.22133	1.87189
8	K5	AF081116	Taf1	1	2.59868	3.10396	1.33763	-0.0431306
9	K5	AF093560	Igh-6	1	1.9995	2.47218	2.56372	2.08977
10	K5	AF276872	Slc5a7	1	2.38568	1.92958	1.71033	2.01946
11	K5	AF330197	Rnf111	1	2.70709	3.1048	1.26596	-0.0466819
12	K5	AF357361	Rnu11 (Not protein)	1	3.09019	3.24584	1.51607	1.32975
13	K5	AK002995	0710005I21Rik	1	2.27091	3.03572	2.836	1.30459
14	K5	AK003325	1110002N22Rik (UPF0629 protein C17orf42)	1	1.75311	3.09497	3.21258	3.09794
15	K5	AK003404	Fbxl22	1	2.47719	2.76143	2.29518	2.49447
16	K5	AK003649	Agpat5	1	2.68412	2.07126	1.94895	1.73823
17	K5	AK004855	1300002K09Rik (Uncharacterized protein KIAA1529)	1	2.03355	2.62211	2.22763	0.679811
18	K5	AK004982	Klhl5	1	2.66263	2.36276	2.27032	1.86183
19	K5	AK005119	1500002J14Rik	1	2.30775	2.03337	1.76883	1.87179
20	K5	AK006642	1700039I01Rik	1	2.10796	2.97091	1.87726	1.08506
21	K5	AK006745	1700049J03Rik	1	2.16384	3.57288	2.89113	2.54976
22	K5	AK006929	Cldnd2	1	2.36036	2.98801	2.42186	2.31235
23	K5	AK007391	Ubr4	1	1.77309	1.81575	2.1634	2.33819
24	K5	AK007903	1810059C17Rik	1	2.72851	2.05052	2.21915	1.90069
25	K5	AK009865	Dzip3	1	2.01445	2.28099	2.1023	1.00447
26	K5	AK011937	2610209M04Rik (U4/U6.U5 tri-snRNP-associated protein 3)	1	2.0557	2.61034	2.24115	1.57545
27	K5	AK013809	2900082C11Rik	1	2.95999	2.35866	1.83874	1.64828
28	K5	AK014261	3110079O15Rik (Uncharacterized protein C2orf82 homolog)	1	1.49152	2.37663	2.86775	3.02688
29	K5	AK014386	Akap5	1	2.42274	2.69281	2.89786	1.9472
30	K5	AK014665	Ppih	1	1.62538	1.72895	2.16299	2.05914
31	K5	AK014901	4921515L22Rik	1	2.09723	2.57054	2.3856	2.37607
32	K5	AK015568	4930473O22Rik	1	1.84953	2.08355	1.89285	1.46349
33	K5	AK015610	4930482G09Rik	1	2.55317	2.24227	2.24035	1.61032
34	K5	AK015837	4930519B02Rik (Fam164b (C6orf94))	1	1.71592	2.5266	2.63317	1.5967
35	K5	AK015855	4930520O04Rik	1	2.26302	2.56523	2.11806	2.00022
36	K5	AK016169	4930558C23Rik	1	2.49614	2.89683	2.62573	2.21696
37	K5	AK016817	Gpr39	1	3.11456	3.81602	2.98973	2.39862
38	K5	AK017152	Slain2	1	2.32408	2.76832	2.56105	1.87634
39	K5	AK019807	Tmem190	1	1.74428	2.31706	2.15885	2.07569
40	K5	AK020389	Tmhs	1	1.85006	1.85675	1.93935	1.77972
41	K5	AK020709	A230103L15Rik	1	1.64186	2.78099	3.22009	3.04388
42	K5	AK020940	A930037H05Rik	1	2.91767	3.24389	2.71297	2.48225
43	K5	AK020990	B230206I08Rik	1	3.79213	2.05357	1.37625	0.575906
44	K5	AK021034	B830042I05Rik	1	2.16355	2.67995	2.63899	2.89343
45	K5	AK021366	E130102B10Rik	1	2.3862	2.00797	2.0807	1.67267
46	K5	AK027261	2700018L05Rik	1	2.31552	2.21499	1.66659	1.28272
47	K5	AY036118	Etf1	1	1.03759	2.16324	2.67648	2.08039
48	K5	BC003984	Triobp	1	1.75188	1.69113	2.09647	1.83802
49	K5	BC004009	Farp1	1	3.03956	3.29592	2.63798	2.58879
50	K5	BC006661	Dbr1	1	1.82926	2.2479	2.491	1.91455
51	K5	BC006909	Prr14	1	1.06602	1.94613	2.30017	1.93398
52	K5	BC012520	Pank4	1	2.65153	2.30702	2.57959	2.11953
53	K5	D29939	Igk-V	1	1.30053	1.97936	2.21718	1.67404
54	K5	L17334	Ggt1	1	1.96156	2.38516	2.17975	1.86151
55	K5	L37414	Gm1499	1	2.24119	2.37359	3.27458	2.38131
56	K5	M10336	Rnu5g	1	3.13357	3.90858	1.63874	0.991951
57	K5	NM_007512	Atpif1	1	2.32028	2.13527	2.10675	1.94261
58	K5	NM_007614	Ctnnb1	1	1.60998	1.9533	1.87174	1.77816
59	K5	NM_007763	Crip1	1	2.14223	1.9805	2.00902	1.58304
60	K5	NM_007949	Ercc2	1	2.11755	2.15348	1.75853	1.60067
61	K5	NM_008374	Il9r	1	2.81288	2.40936	2.01436	1.5711
62	K5	NM_008423	Kcnd1	1	3.2214	1.95583	1.75877	1.69927
63	K5	NM_008521	Ltc4s	1	1.42385	2.33901	1.58363	1.81787
64	K5	NM_008713	Nos3	1	1.62563	2.22891	1.7173	1.87943
65	K5	NM_009100	Rptn	1	1.09407	1.74549	2.22491	2.3735
66	K5	NM_009154	Sema5a	1	1.90561	2.42335	1.6202	2.27863
67	K5	NM_009329	Zfp354a	1	2.12366	2.58155	3.28994	2.5417
68	K5	NM_009496	Vamp1	1	1.68354	2.56788	1.65557	1.44359
69	K5	NM_009788	Calb1	1	1.69075	2.40382	2.46102	1.77423
70	K5	NM_009996	Cyp24a1	1	2.36207	2.83031	3.02604	2.8682
71	K5	NM_010430	Hic1	1	2.52187	2.85612	2.00965	1.61193
72	K5	NM_010577	Itga5	1	2.79658	3.19697	2.49093	2.16908
73	K5	NM_010726	Phyh	1	2.09818	2.08701	2.33107	1.89362
74	K5	NM_010798	Mif	1	2.09818	2.46077	1.76644	1.32309
75	K5	NM_011856	Odz2	1	2.80439	2.20554	1.37389	1.45227
76	K5	NM_013458	Add2	1	1.98366	2.29621	1.6933	1.58581
77	K5	NM_013506	Eif4a2	1	2.13556	2.51345	1.53304	1.37928
78	K5	NM_013557	Eif2ak1	1	2.24543	2.50111	1.69783	1.69899
79	K5	NM_013798	Actg1	1	1.85294	2.60063	2.16327	1.643
80	K5	NM_016845	Acrbp	1	2.59218	2.27251	2.32696	2.26054
81	K5	NM_019965	Dnajb12	1	1.97117	1.89917	1.82591	1.94636
82	K5	NM_020004	Gcn5l2	1	2.038	2.66058	2.61224	3.28799
83	K5	NM_024435	Nts	1	2.46948	2.91451	2.43987	2.3879
84	K5	NM_026522	Chid1	1	1.36155	1.96658	2.05849	2.14281
85	K5	NM_029392	N/A	1	2.68819	2.90382	1.71016	0.0460283
86	K5	S37484	Agtr1a	1	2.87	2.53694	3.04778	2.36193
87	K5	U16179	Igh-6	1	2.16941	2.20672	1.87518	1.71152
88	K5	U69541	Igh-6	1	1.80815	2.44104	1.81142	2.01004
89	K5	U89924	Ppp1r3c	1	2.7991	2.79215	2.26043	1.9208
90	K5	U95921	Tcra	1	2.29424	2.28815	1.7994	1.83305
91	K5	X56029	Rnu3a	1	1.52512	3.13492	1.73001	0.607656
92	K5	X76290	Shh	1	2.01689	2.01024	1.98783	2.15353
93	K5	X96705	Def6	1	-1.58091	-2.03763	-1.93759	-1.85807
94	K5	Z12430	N/A	1	2.27657	2.87435	2.46874	1.90835
95	K5	Z95478	Igk-V	1	1.58734	1.64573	1.87969	2.38983
-	K5	Average profile			2.13875	2.42399	2.14013	1.81701
	K5	Trajectory profile signature			2	2	2	2
