# Supplementary material for: Identification of Putative Ortholog Gene Blocks Involved in Gestant and Lactating Mammary Gland Development: A Rodent Cross-Species Microarray Transcriptomics Approach
Source: Int J Genomics. 2013 Oct 30;2013:624681. doi: 10.1155/2013/624681 (PMC3830774; doi:10.1155/2013/624681)
Supplement: Supplementary file 1 — This manuscript contains supplementary material to give a better overview of the results. In Table S1 we are describing the experimental design of heterologous microarrays hybridization; in Table S2 we showed the primers and probes for the qRT-PCR analysis for confirmation of microarray results. In S3 we are showing the list of up- and downregulated genes during pregnancy (P5, P14) and/or lactation (L1, L12) that shared spatial and temporal distributions. In S4 we described all the gene hierarchical cluster sets of altered gene transcript. In S5 is the list of altered gene transcript K-means cluster sets that correspond to potential groups of co-regulated genes. K-means clustering revealed six distinct clusters (K1-6) that distinguished up from down, early from middle, and transient from sustained changes in expression. The data from Table S6 shows the list of orthologous significant altered gene transcripts to rat and/or human in pregnancy (day 5 and 14) and lactancy (day 1 and 12). The Table S7 shows the list of families of transcription factors identified in different stage development of mammary gland. Finally in Table S8 we are describing the functional gene blocks detailed information. [file 624681.f1.zip › 624681.f6.xls]

## Sheet: Table S6
Table S6. List of orthologous significant altered gene transcripts in pregnancy (day 5 and 14) and lactancy (day 1 and 12).
Adscription Category	Number	Flag				Gene		Cytogenetic Location			Roundup Orthology Database
		Vdiagram		Hcluster	Kcluster	NCBI ID	Official Symbol	Mm	Rn	Hs	Phylogenetic Profile Number	Average Distance
Orthologous to rat and human	1	D	k	C1	K4	BF141398	Abcd1	X 29.5 cM	Xq37	Xq28	5398	0.04
	2	D	o	C1	K4	X03766	Acta1	8 67.0 cM	19q12	1q42.13-q42.2	7873	0
	3	D	n	C1	K1	NM_007396	Acvr2	2 30.0 cM	3q12	2q22.3	8714	0.007
	4	D	k	C1	K1	NM_007414	Adprh	16 B4	11q21	3q13.31-q13.33	14919	0.144
	5	D	o	C1	K1	S81393	Aga	8 B3	16p11	4q32-q33	3615	0.171
	6	D	j	C1	K1	U95030	Alcam	16 B5	11q21	3q13.1	9067	0.049
	7	D	o	C1	K1	BC012407	Aldh7a1	18 29.0 cM	18q12.1	5q31	8760	0.086
	8	D	d	C1	K1	AJ132391	Aldoc	11 44.98 cM	10	17cen-q12	4990	0.021
	9	D	k	C1	K1	AK009331	Arhgef12	9 B	8q22	11q23.3	8223	0.085
	10	D	h	C5	K4	NM_019689	Arid3b	9 C	8q24	15q24	8231	0.097
	11	D	e	C5	K1	AK004614	Arrb1	7 50.0 cM	1q32	11q13	4174	0.01
	12	D	n	C1	K1	NM_007511	Atp7b	8 10.0 cM	16q12.2-q12.4	13q14.3	755	0.139
	13	D	o	C1	K4	NM_019420	B3galt4	17 B1	20p12	6p21.3	9401	0.137
	14	D	j	C1	K1	NM_009738	Bche	3 E3	2q32	3q26.1-q26.2	13413	0.167
	15	D	n	C1	K1	NM_031368	Bglap-rs1	3 42.6 cM	N/A	N/A	8243	0.392
	16	D	k	C1	K4	AB026997	Cast	13 C1	2q11	5q15	456 / 391	0.311 / 0.447
	17	D	k	C1	K4	NM_013926	Cbx8	11 E2	10q32.3	17q25.3	12199	0.048
	18	D	o	C1	K4	NM_009840	Cct8	16 C3.3	11q11	21q22.11	241	0.024
	19	D	k	C1	K1	AK008389	Ceacam18	7 B4	1q22	19q13.33	4898	0.454
	20	D	e	C5	K1	M60493	Cftr	6 3.1 cM	4q21	7q31.2	1381	0.178
	21	D	o	C1	K1	AK016529	Clec16a	16 A1	10q11	16p13.13	4195	0.054
	22	D	k	C1	K1	NM_016685	Comp	8 33.0 cM	16	19p13.1	283	0.063
	23	D	a	C5	K1	AF156987	Cry2	2 E	3q24	11p11.2	6937	0.036
	24	D	o	C1	K1	NM_009980	Ctbp2	7 66.0 cM	1q41	10q26.13	7049	0.02
	25	D	k	C1	K1	NM_016748	Ctps	4 57.0 cM	5q36	1p34.1	2333	0.022
	26	D	e	C5	K1	AK003679	Cul4a	8 A1.1	16	13q34	5178	0.03
	27	D	c	C1	K1	AK011404	D19Ertd737e	19 D3; 19 57.0 cM	1q55	10q26.11	6582	0.168
	28	D	h	C1	K1	NM_013810	Dbnl	11 1.0 cM	14q21	7p13	15563	0.103
	29	D	o	C1	K4	BC011321	Ddx27	2 H3	3q42	20q13.13	6402	0.093
	30	D	a	C6	K5	X96705	Def6	17 A3.3	20p12	6p21.33-p21.1	11668	0.053
	31	D	o	C1	K4	AK014624	Depdc6	15 6.7 cM	7q31	8q24.12	12812	0.034
	32	D	o	C1	K4	NM_026819	Dhrs1	14 22.5 cM	15p13	14q12	3547	0.148
	33	D	k	C1	K1	AF280809	Dusp3	11 D	10q32.1	17q21	4930	0.062
	34	D	k	C1	K1	AK012530	Dusp4	8 A4	16q12.2	8p12-p11	8831	0.019
	35	D	e	C5	K1	X06746	Egr2	10 35.0 cM	20p11	10q21.1	14412	0.06
	36	D	k	C1	K1	AK006438	Eid3	10 C1	7q13	12q23-q24.1	4231	0.227
	37	D	o	C1	K1	NM_013509	Eno2	6 60.21 cM	4q42	12p13	14062	0.015
	38	D	a	C5	K1	BC005527	Enpp3	10 A4	1p12	6q22	14131	0.166
	39	D	h	C1	K1	AK012292	Entpd6	2 G3	3q41	20p11.2-p11.22	15658	0.077
	40	D	l	C1	K1	AK013481	Epha4	1 43.0 cM	9q33	2q36.1	7378	0.009
	41	D	k	C1	K4	NM_007948	Ercc1	7 4.0 cM	1q21	19q13.2-q13.3	7055	0.131
	42	D	o	C1	K4	M57960	Es1	10 41.7 cM	20p12	21q22.3	14918	0.086
	43	D	k	C5	K1	NM_021388	Extl2	3 G1	2q41	1p21	350	0.121
	44	D	o	C1	K1	NM_007970	Ezh1	11 62.0 cM	10q32.1	17q21.1-q21.3	5163	0.016
	45	D	k	C1	K1	AK015673	Fam154a	4 C3	5q32	9p22.1	2289	0.258
	46	D	o	C1	K1	AF112439	Fancg	4 B1	5q22	9p13	12365	0.242
	47	D	o	C1	K4	AF119148	Flnc	6 A3.3	4q22	7q32-q35	14264	0.01
	48	D	o	C1	K4	NM_008076	Gabrr2	4 10.5 cM	5q21	6q13-q16.3	13283	0.072
	49	D	o	C1	K4	NM_008105	Gcnt2	13 17.0 cM	17p12	6p24.2	11622	0.253
	50	D	e	C1	K1	AK010388	Glt8d1	14 B	16p16	3p21.1	11167	0.094
	51	D	k	C1	K1	AB055854	Gmcl1l	X A3.1	N/A	5q35.3	7876	0.056
	52	D	o	C1	K1	NM_025278	Gng12	6 30.0 cM	4q31	1p31.3	6763	0.021
	53	D	k	C1	K4	NM_010323	Gnrhr	5 44.0 cM	14p21	4q21.2	7449	0.077
	54	D	o	C1	K4	AK008972	Golga1	2 B	3q11	9q33.3	7630	0.137
	55	D	o	C1	K4	BC011152	Golm1	13 B3	N/A	9q21.33	4985	0.32
	56	D	d	C1	K1	AF146569	Gprin1	13 B2	17p14	5q35.2	6971	0.407
	57	D	h	C1	K1	AK018084	Gpsm2	3 F3	2q34	1p13.3	4744	0.072
	58	D	e	C5	K1	AF082159	Grifin	5 G2	12q11	7p22.2	7203	0.15
	59	D	k	C1	K1	NM_010353	Gsg2	11 47.0 cM	N/A	17p13	1352	0.35
	60	D	o	C5	K4	BF163506	Gsto1	19 D1	1q54	10q25.1	11862	0.292
	61	D	k	C1	K1	NM_010401	Hal	10 51.0 cM	7q13	12q22-q24.1	10788	0.03
	62	D	a	C1	K1	BC008158	Ifi35	11 D	10q32.1	17q21	13639	0.254
	63	D	o	C1	K4	NM_008330	Ifi47	11 B1.2	10q21	N/A	3019 / 17740	0.094 / 0.345
	64	D	e	C5	K1	NM_010518	Igfbp5	1 36.1 cM	9q33	2q33-q36	3001	0.031
	65	D	k	C5	K1	NM_009212	Ighmbp2	19 0.0 cM	1q42	11q13.3	14926	0.19
	66	D	h	C1	K1	BC009127	Ing4	6 59.3 cM	4q42	12p13.31	642	0.006
	67	D	e	C5	K1	NM_016780	Itgb3	11 68.0 cM	10	17q21.32	7243	0.073
	68	D	o	C1	K4	BF540497	Jund	8 33.0 cM	16p14	19p13.2	5451	0.088
	69	D	g	C1	K1	BC011472	Kdelr3	15 E1	7q34	22q13.1	15029	0.08
	70	D	e	C5	K1	AF090190	Kif1b	4 70.9 cM	5q36	1p36.2	7988	0.022
	71	D	o	C1	K4	NM_008453	Klf3	5 C3.1	14p11	4p14	7311	0.034
	72	D	k	C1	K1	AK018314	Klhl24	16 B1	11q23	3q27.1	14092	0.003
	73	D	k	C1	K4	AK003996	Klk5	7 24.0 cM	1q22	19q13.3-q13.4	6237	0.196
	74	D	a	C5	K1	NM_008465	Kpna1	16	11q22	3q21	12244	0.014
	75	D	d	C1	K1	BC006060	Lars	18 E	18p11	5q32	11374	0.101
	76	D	k	C1	K1	AK017509	Lca5	9 E2	8q31	6q14.1	4768	0.247
	77	D	e	C5	K1	AK004487	Lhfpl4	6 E3	4q42	3p25.3	8657	0.012
	78	D	e	C1	K1	BC005621	Lims1	10 30.0 cM	20q11	2q12.3-q13	10962	0.019
	79	D	k	C1	K4	AK007091	Loxhd1	18 E3	18q12.3	18q21.1	7650	0.064
	80	D	o	C1	K4	NM_024194	Lrrc40	3 H4	2q45	1p31.1	11438	0.127
	81	D	a	C5	K1	AK013512	Lrrc47	4 E2	5q36	1p36.32	9908	0.085
	82	D	o	C1	K4	AK013491	Macrod2	2 F3	3q41	20p12.1	12893	0.315
	83	D	k	C1	K1	AF319983	Magee2	X C3	Xq31	Xq13.3	9092	0.143
	84	D	l	C1	K1	AF117340	Map3k1	13 60.0 cM	2q14	5q11.2	4180	0.055
	85	D	l	C1	K1	AK003316	Mbnl2	14 E4	15q24	13q32.1	3069	0.011
	86	D	a	C5	K1	AK018323	Med12l	3 D	2q31	3q25.1	17348	0.271
	87	D	k	C1	K1	NM_020000	Med8	4 D1	5q36	1p34.2	178	0.019
	88	D	b	C1	K1	Z16406	Meox2	12 20.0 cM	6q21	7p22.1-p21.3	3355	0.015
	89	D	e	C1	K1	NM_008610	Mmp2	8 44.0 cM	19p11	16q13-q21	5564	0.025
	90	D	o	C1	K1	AK015161	Morn1	4 E2	5q36	1p36.33-p36.32	7480	0.193
	91	D	k	C1	K1	NM_026080	Mrps24	11 A1	14q21	7p14	4072	0.122
	92	D	o	C1	K4	NM_008667	Nab1	1 27.0 cM	9q22	2q32.3-q33	8827	0.049
	93	D	e	C5	K1	AK013287	Nat13	16 B4	11q21	3q13.2	9686	0.015
	94	D	o	C1	K4	AK007894	Ndufaf2	13 D2.1	2q14	5q12.1	7597	0.109
	95	D	k	C1	K4	BC014818	Ndufv1	19 A	1q42	11q13	8474	0.031
	96	D	a	C5	K1	D30730	Nf1	11 46.06 cM	10q25	17q11.2	9741	0.014
	97	D	a	C5	K1	S76791	Nfasc	1 70.0 cM	13q13	1q32.1	6976	0.207
	98	D	k	C1	K1	AJ245945	Ngb	12 D3	6q31	14q24.3	14513	0.052
	99	D	k	C5	K1	NM_008697	Nin	12	6q24	14q22.1	10971	0.246
	100	D	o	C1	K4	NM_026330	Nsmce1	7 F3	1q36	16p12.1	10873	0.089
	101	D	o	C1	K4	AF254422	Pax7	4 69.0 cM	5q36	1p36.2-p36.12	11882	0.072
	102	D	o	C1	K4	NM_008792	Pcsk2	2 81.4 cM	3q42	20p11.2	4018	0.02
	103	D	d	C1	K1	NM_010329	Pdpn	4 E1	5q36	1p36.21	15451	0.746
	104	D	k	C1	K1	NM_029231	Pelp1	11 B3	10q24	17p13.2	8235	0.095
	105	D	o	C1	K4	AF176516	Polr2f	15 46.6 cM	7q34	22q13.1	5336	0.004
	106	D	a	C5	K1	NM_011136	Pou2af1	9 A5.3	8q24	11q23.1	3682	0.076
	107	D	k	C1	K4	AF408400	Ppp1r14d	2 E5	3q35	15q15.1	13025	0.152
	108	D	o	C1	K4	NM_019441	Ppt2	17 18.9 cM	20p12	6p21.3	5590	0.052
	109	D	d	C1	K1	NM_025834	Proz	8 A2	16q12.5	13q34	9170	0.328
	110	D	k	C5	K1	AF153479	Ptges3	10 D3	7q11	12	5206	0.094
	111	D	k	C1	K4	NM_008975	Ptp4a3	15 E1	7q34	8q24.3	14517	0.024
	112	D	o	C1	K1	NM_011203	Ptpn12	5 A3-B	4q11	7q11.23	1892	0.104
	113	D	d	C1	K1	AF236125	Punc	9 40.0 cM	8q24	15q22.3-q23	13529	0.098
	114	D	o	C1	K4	X57277	Rac1	5 82.0 cM	12p11	7p22	3127	0
	115	D	k	C5	K1	M31441	Rad52	6 55.0 cM	4q42	12p13-p12.2	11706	0.309
	116	D	o	C1	K4	M32070	Rarg	15 57.4 cM	7q36	12q13	6789	0.023
	117	D	h	C1	K1	AK016773	Rbbp5	1 E4	13q13	1q32	6978	0.009
	118	D	o	C1	K4	AF303831	Rdh14	12 A1.1	6q14	2p24.2	1166	0.068
	119	D	n	C1	K1	NM_025934	Riok2	17 A3.1	1q12	5q15	14617	0.152
	120	D	l	C1	K1	NM_019692	Rit2	18 B1	18p12	18q12.3	7182	0.052
	121	D	d	C5	K1	AK012956	Rnf216	5 G2	12p11	7p22.1	11318	0.099
	122	D	o	C1	K4	NM_009071	Rock1	18 A2	18p13	18q11.1	7542	0.027
	123	D	h	C1	K1	AK010289	Rpain	11 B4	10q24	17p13.2	584	0.254
	124	D	k	C1	K1	AK018342	Rtf1	2 E5	3q35	15q15.1	792	0.013
	125	D	o	C1	K1	AJ292968	Sav1	12 C3	6q24	14q13-q23	3763	0.044
	126	D	o	C1	K4	AF295402	Scamp2	9 B	8q24	15q23-q25	5733	0.079
	127	D	l	C1	K1	BC013244	Scyl1bp1	1 H2.1	13q22	1q24.2	2607	0.236
	128	D	k	C1	K4	NM_008223	Serpind1	16 9.5 cM	11q23	22q11.21	1597	0.12
	129	D	l	C1	K1	NM_008878	Serpinf2	11 B5	10q24	17p13	4918	0.241
	130	D	k	C5	K1	AF312007	Sgk3	1 7.5 cM	5	8q12.3-q13.1	12746	0.017
	131	D	n	C1	K4	AK009505	Slamf9	1 H3	13q24	1q23.2	5620	0.486
	132	D	a	C5	K1	NM_008732	Slc11a2	15 59.8 cM	7q36	12q13	11147	0.088
	133	D	o	C1	K4	NM_009579	Slc30a1	1 106.0 cM	13q27	1q32-q41	193	0.093
	134	D	o	C1	K4	NM_023557	Slc44a4	17 B2	20p12	6p21.3	9538	0.149
	135	D	o	C1	K4	AK005338	Snx15	19 A	1q43	11q12	14285	0.071
	136	D	o	C1	K4	NM_013671	Sod2	17 7.6 cM	1q21	6q25.3	9325	0.094
	137	D	o	C1	K4	X81633	Spag5	11 44.95 cM	10q25	17q11.2	498	0.301
	138	D	k	C1	K1	AK014869	Spata16	3 A3	2q24	3q26.31	1534	0.17
	139	D	o	C1	K4	NM_009177	St3gal1	15 D2	7q33	8q24.22	14863	0.151
	140	D	o	C1	K4	NM_011372	St6galnac3	3 H4	2q45	1p31.1	8521	0.114
	141	D	o	C1	K4	NM_019667	Stam2	2 C1.1	3q12	2q23.3	1495	0.118
	142	D	k	C1	K1	AK017291	Stx16	2 H4	3q42	20q13.32	11190	0.057
	143	D	o	C1	K4	AK008108	Sulf2	2 H3	3q42	20q12-q13.2	405	0.039
	144	D	k	C5	K1	NM_009299	Sva	6 B2.1	4	N/A	12541	1.072
	145	D	e	C1	K1	BC008995	Tars2	3 F2.1	2q34	1q21.2	15028	0.126
	146	D	e	C1	K1	BC008166	Tax1bp3	11 B4	10q24	17p13	8717	0.009
	147	D	o	C1	K1	NM_025706	Tbc1d15	10 D2	7q22	12q21.1	10870	0.067
	148	D	o	C1	K4	BF164689	Tcirg1	19 6.0 cM	1q42	11q13.2	7528	0.112
	149	D	k	C1	K1	NM_031387	Tdrd1	19 D2	1q55	10q25.3	16809	0.196
	150	D	k	C1	K1	NM_009353	Terf2	8 52.5 cM	19q12	16q22.1	3545	0.124
	151	D	k	C1	K4	U69898	Timm44	8 2.5 cM	12p12	19p13.3-p13.2	8307	0.078
	152	D	o	C1	K1	AK014697	Tm7sf4	15 C	7q22	8q23	12463	0.239
	153	D	k	C1	K4	AK020752	Tmem86b	7 A1	1q12	19q13.42	1927	0.325
	154	D	o	C1	K4	X81718	Tmem97	11 45.19 cM	10q25	17q11.2	8667	0.143
	155	D	n	C1	K4	NM_012034	Tpsg1	17 10.38 cM	10q12	16p13.3	5640	0.26
	156	D	h	C1	K1	NM_009429	Tpt1	14 D3	15q11	13q12-q14	2839	0.021
	157	D	a	C5	K1	NM_013838	Trpc6	9 1.0 cM	8q11	11q21-q22	15047	0.051
	158	D	e	C5	K1	NM_016909	Tsnax	8 69.5 cM	19	1q42.1	5036	0.075
	159	D	l	C1	K1	AK019322	Ttyh3	5 G2	12q11	7p22	11566	0.039
	160	D	o	C1	K1	NM_026275	Ube2r2	4 B1	5q22	9p13.3	2671	0
	161	D	k	C1	K1	BC011313	Ubfd1	7 59.0 cM	1q36	16p12	6363	0.026
	162	D	k	C1	K1	D88447	Ubxn8	8 A4	16q12.3	8p12-p11.2	7739	0.239
	163	D	k	C1	K1	BC008617	Unc119b	5 F	12q16	12q24.31	5317	0.076
	164	D	g	C1	K1	AK017733	Wbscr16	5 G2	12q12	7q11.23	10179	0.07
	165	D	e	C5	K1	AY029528	Xpo6	7 F3	1q36	16p11.2	12352	0.015
	166	D	o	C1	K1	AK003432	Xpot	10 D3	7q22	12q14.2	4670	0.023
	167	D	o	C1	K4	AK020870	Zbtb20	16 28.9 cM	11q21	3q13.2	14295	0.021
	168	D	e	C5	K1	M36516	Zfp28	7 A1	1q12	19	6967	0.242
	169	D	j	C1	K1	AB010319	Zfp287	11 B2	10q23	17p11.2	8778	0.162
	170	D	o	C1	K1	NM_018759	Zfp326	5 E5	N/A	1p22.2	7418	0.109
	171	D	o	C1	K4	U29508	Zfp72	13 C1	N/A	22q11.21	7319	0.141
	172	D	n	C1	K1	U29511	Zfp78	7 8.0 cM	1q12	19q13.43	813	0.321
	173	D	o	C1	K1	AK002276	0610007C21Rik (Apr3)	5 B1	6q14	N/A	5626	0.149
	174	D	i	C1	K1	AK004090	1110034G24Rik	2 F3	N/A	N/A	14435	0.236
	175	D	e	C1	K1	AK007385	1810008N23Rik (Amy2)	3	N/A	N/A	4737	0.106
	176	D	e	C5	K1	AK007756	1810043H04Rik	11 E2	10q32.3	17q25.3	3720	0.069
	177	D	o	C1	K1	AK019094	2310046O06Rik	9 B	N/A	15q24.1	7196	0.202
	178	D	e	C1	K1	BC010499	2610301G19Rik (KIAA1967 (DBC1))	14 D2	15p11	8p22	3967	0.048
	179	D	e	C5	K1	AK021189	2810021B07Rik (Ttdn1)	13 A3.1	17q12.1	7p14.1	7161	0.073
	180	D	h	C5	K1	AK014123	3110035E14Rik	1 A2	5q11	8q13.1	3815	0.129
	181	D	o	C1	K4	AK019480	Fam122b	X A5	Xq36	Xq26.3	5198	0.142
	182	D	k	C1	K1	AK019999	5830406C21Rik	12	N/A	N/A	12648	0.28
	183	D	o	C1	K4	AK018414	8430415E04Rik (Kiaa1622 (Pp4r4) (Ppp4r4))	12 F1	N/A	14q32.13	11616	0.063
	184	U	j	C3	K2	AK004375	Abhd13	8 A2	16q12.5	13q33.3	4844	0.017
	185	U	a	C6	K5	NM_016845	Acrbp	6 F2	4q42	12p13.31	5667	0.184
	186	U	o	C3	K2	NM_031404	Actl6	5 G2	12q12	7q22	11711	0.009
	187	U	a	C2	K5	NM_013458	Add2	6 35.0 cM	4q34	2p14-p13	12747	0.052
	188	U	i	C2	K3	U05672	Adora2a	10	20p12	22q11.23	12734	0.115
	189	U	d	C4	K2	NM_009633	Adra2b	2 71.0 cM	3q36	2p13-q13	8476	0.116
	190	U	o	C3	K2	NM_007423	Afp	5 50.0 cM	14p21	4q11-q13	11988 / 10140	0.358 / 0.367
	191	U	a	C2	K5	AK003649	Agpat5	8 7.0 cM	16q12.5	8p23.1	5127	0.124
	192	U	a	C6	K5	S37484	Agtr1a	13 16.0 cM	17q12	3q21-q25	4448	0.047
	193	U	k	C4	K2	X53402	Aldob	4 B1	5q22	9q21.3-q22.2	4730	0.034
	194	U	n	C3	K6	NM_026247	Alg13	X F2	Xq14	Xq23	1523	0.095
	195	U	k	C3	K2	AK016678	Als2cr12	1 C2	9q31	2q33.1	11982	0.472
	196	U	k	C4	K2	D31768	Amelx	X 73.0 cM	Xq21	Xp22.31-p22.1	1954	0.101
	197	U	n	C3	K6	AK002981	Ankrd13d	19 A	1q42	11q13.1	11157	0.05
	198	U	l	C2	K3	NM_011922	Anxa10	8 32.0 cM	16p12	4q33	10866	0.099
	199	U	d	C4	K2	NM_009696	Apoe	7 4.0 cM	1q21	19q13.2	6132	0.235
	200	U	k	C3	K2	NM_009699	Aqp2	15 F1	7q36	12q12-q13	3460	0.065
	201	U	l	C2	K3	BC009156	Arhgef18	8 A1.1	12p12	19p13.3	15055	0.146
	202	U	l	C2	K3	AK007484	Atg7	6 E3	4q42	3p25.3-p25.2	6782	0.045
	203	U	d	C2	K3	NM_009720	Atox1	11 B1.3	10q22	5q32	14354	0.108
	204	U	a	C2	K3	NM_020026	B3galnt1	3 E1	2q32	3q25	41	0.064
	205	U	l	C2	K3	NM_019693	Bat1a	17 19.12 cM	20p12	6p21.3	9193	0.003
	206	U	a	C2	K5	AF068182	Blnk	19 31.0 cM	1q54	10q23.2-q23.33	5673	0.099
	207	U	d	C4	K2	NM_011795	C1ql1	11 D	10q32.1	17q21	15009	0.012
	208	U	e	C2	K3	AK016953	Cage1	13 A5	17p12	6p24.3	3714	0.429
	209	U	a	C2	K5	NM_009788	Calb1	4 10.5 cM	5q13	8q21.3-q22.1	8359	0.012
	210	U	l	C2	K3	NM_019513	Car5b	X F5	Xq21	Xp21.1	10874	0.073
	211	U	n	C3	K6	M12052	Cd8a	6 30.5 cM	4q33	2p12	11313	0.617
	212	U	k	C3	K2	AK020591	Centb2	16 B2	11q22	3q29	12902	0.024
	213	U	f	C2	K3	Y11896	Chic1	X 42.3 cM	Xq31	Xq13-q21	2192	0.035
	214	U	d	C2	K5	NM_026522	Chid1	7 F5	1q41	11p15.5	11796	0.068
	215	U	n	C3	K6	NM_025415	Cks2	13 A5	17p14	9q22	6873	0.006
	216	U	l	C2	K3	NM_021386	Cldn10	14 E4	15q24	13q31-q34	11963	0.049
	217	U	a	C6	K5	AK006929	Cldnd2	7 B2	1q22	19q13.33	16711	0.189
	218	U	f	C2	K3	NM_016673	Cntfr	4 19.9 cM	5q22	9p13	7065	0.04
	219	U	c	C2	K3	AK004878	Coasy	11 D	10q32.1	17q12-q21	2580	0.097
	220	U	d	C4	K2	NM_007754	Cpd	11 46.0 cM	10q26	17q11.2	2892	0.049
	221	U	h	C2	K3	NM_007761	Crcp	5 G1.3	12q13	7q11.21	11839	0.07
	222	U	c	C2	K3	AF287260	Creb3l4	3 F1	2q34	1q21.3	13439	0.26
	223	U	a	C2	K5	NM_007763	Crip1	12 57.9 cM	6q32	14q32.33	8427	0.013
	224	U	b	C2	K3	AK002408	Crls1	2 F3	3q36	20p13-p12.3	4433	0.019
	225	U	d	C3	K2	NM_007770	Crx	7 8.5 cM	1q21	19q13.3	3918	0.026
	226	U	a	C4	K2	NM_009972	Csn2	5 44.91 cM	14p21	4q21.1	2463	0.673
	227	U	d	C2	K3	NM_007786	Csn3	5 45.2 cM	14p21	4q21.1	7699	0.002
	228	U	a	C2	K5	NM_007614	Ctnnb1	9 72.0 cM	8q32	3p21	2951	0.001
	229	U	a	C6	K5	NM_009996	Cyp24a1	2 99.0 cM	3q42	20q13	5456	0.127
	230	U	d	C4	K2	BC008638	Dars	1 E4	13q12	2q21.3	1082	0.026
	231	U	d	C4	K2	NM_011873	Dazap2	15 60.0 cM	7q36	12q12	14000	0.012
	232	U	f	C2	K3	NM_028146	Dbndd1	8 67.0 cM	19q12	16q24.3	8903	0.189
	233	U	a	C2	K5	BC006661	Dbr1	9 F1	8q31	3q22.3	12948	0.114
	234	U	f	C2	K3	NM_019454	Dll4	2 E3	3q35	15q14	3298	0.096
	235	U	a	C2	K5	NM_019965	Dnajb12	10 B3	20q11	10q22.1	5211	0.056
	236	U	o	C3	K2	NM_025384	Dnajc15	14 D3	15q11	13q14.1	9545	0.152
	237	U	e	C2	K3	NM_007898	Doc2b	11 B5	10q24	17p13.3	6973	0.035
	238	U	b	C2	K3	NM_008748	Dusp8	7 69.0 cM	1q41	11p15.5	11165	0.063
	239	U	c	C2	K5	AK009865	Dzip3	16 B5	11q21	3q13.13	9548	0.066
	240	U	f	C2	K3	U89415	Eef2	10 C1	7q11	19pter-q12	4939	0.005
	241	U	a	C2	K5	NM_013557	Eif2ak1	5 G2	12p11	7p22	8426	0.132
	242	U	c	C2	K5	NM_013506	Eif4a2	16 14.2 cM	11q23	3q28	269	0.018
	243	U	d	C2	K3	BC003937	Epb4.1l5	1 E2.3	13q11	2q14.2	9084	0.429
	244	U	k	C4	K2	NM_007680	Ephb6	6 B2.1	4q22	7q33-q35	6312	0.044
	245	U	c	C2	K3	NM_010157	Esr2	12 33.0 cM	6q24	14q23.2	516	0.076
	246	U	d	C4	K5	AY036118	Etf1	18 B1	18p12	5q31.1	11119	0.002
	247	U	l	C2	K3	AK013325	Fance	17 A3.3	20p12	6p22-p21	14181	0.326
	248	U	a	C6	K5	BC004009	Farp1	14 E5	15q24-q25	13q32.2	4206	0.054
	249	U	k	C3	K2	NM_007990	Fau	19 3.0 cM	1q43	11q13	2386	0.015
	250	U	a	C6	K5	AK003404	Fbxl22	9 C	8q24	15q22.31	14056	0.628
	251	U	l	C2	K3	NM_010232	Fmo5	3 F2.2	2q34	1q21.1	10254	0.11
	252	U	b	C2	K3	X76684	Foxa1	12 26.0 cM	6q23-q24	14q12-q13	6638	0.047
	253	U	k	C3	K2	NM_023907	Foxi1	11 A5	10q12	5q34	14258	0.091
	254	U	k	C3	K2	NM_010248	Gab2	7	1	11q14.1	12417	0.049
	255	U	l	C2	K3	NM_016722	Galns	8 E1	19q12	16q24.3	13374	0.106
	256	U	d	C4	K2	NM_008095	Gbas	5 G1.3	12q13	7p12	5497	0.062
	257	U	a	C6	K5	NM_020004	Gcn5l2	11 61.4 cM	10q32.1	17q21	5860	0.011
	258	U	a	C2	K5	L17334	Ggt1	10 C1	20	22q11.23	3983	0.238
	259	U	j	C2	K3	L17335	Ggt1	10 C1	20	22q11.23	3983	0.238
	260	U	k	C3	K2	NM_010296	Gli	10 69.0 cM	7q22	12q13.2-q13.3	6176	0.121
	261	U	l	C2	K3	AF124383	Gnas	2 E1-H3; 2 104.0 cM	3q42	20q13.3	3966 / 3494	0.040 / 0.131
	262	U	k	C3	K2	NM_023120	Gnb1l	16 11.28 cM	11q23	22q11.2	6178	0.163
	263	U	d	C4	K2	AF154337	Gpr137b	13 6.0 cM	17q12.1	1q42-q43	8800	0.035
	264	U	i	C3	K6	NM_010287	Gpr83	9 2.0 cM	8q11	11q21	11394	0.071
	265	U	k	C3	K2	L23316	Gpsm1	2 A3	3p13	9q34.3	11869	0.046
	266	U	c	C2	K3	NM_008192	Gucy2e	11 37.0 cM	10q24	11q13.5	3620	0.107
	267	U	k	C3	K2	BC003491	Hdhd3	4 C1	5q24	9q32	10556	0.203
	268	U	f	C2	K3	NM_010423	Hey1	3 2.4 cM	2q23	8q21	9868	0.068
	269	U	o	C3	K2	AK003605	Hhatl	9 F4	8q32	3p22.1	12758	0.065
	270	U	a	C6	K2	X16496	Hist1h3g	13 A2-A3	17q11	6p21.3	199	0
	271	U	l	C2	K3	L16948	Hk1	10 30.0 cM	20q11	10q22	12364	0.141
	272	U	k	C3	K2	AF247663	Hoxa6	6 26.3 cM	4q24	7p15-p14	8962	0.022
	273	U	i	C2	K3	U89889	Hpx	7 F1	1q33	11p15.5-p15.4	8563	0.2
	274	U	k	C3	K2	AF284437	Il1rapl2	X F1	Xq35	Xq22.2-q22.3	5062	0.033
	275	U	a	C2	K5	NM_008374	Il9r	11 A4	10q12	Xq28 and Yq12	5464	0.413
	276	U	i	C2	K3	NM_013754	Insl6	19 C3	1q52	9p24	10243	0.639
	277	U	k	C3	K2	AK014939	Ints10	8 C1	16p14	8p21.3	6295	0.033
	278	U	i	C3	K6	NM_010570	Irs1	1 57.0 cM	9q34	2q36	14827	0.068
	279	U	a	C6	K5	NM_010577	Itga5	15 57.4 cM	7q36	12q11-q13	12929	0.062
	280	U	k	C3	K2	NM_008397	Itga6	2 38.0 cM	3q22	2q31.1	3961	0.045
	281	U	k	C3	K2	NM_021275	Kcna4	2 61.0 cM	3q33	11p14	1487	0.016
	282	U	c	C4	K2	NM_010597	Kcnab1	3 32.0 cM	2q31	3q26.1	15106	0.003
	283	U	a	C2	K5	NM_008423	Kcnd1	X 2.2 cM	Xq13	Xp11.23	3256	0.035
	284	U	k	C3	K2	AK014626	Kcnk16	14 B	15p16	6p21.2-p21.1	9283	0.058
	285	U	n	C3	K6	NM_021542	Kcnk5	14	15p16	6p21	11783	0.076
	286	U	j	C2	K3	NM_019956	Krt71	15 63.2 cM	7	12q13.13	10889	0.051
	287	U	i	C3	K6	AK018070	Lpo	11	10q26	17q23.1	14876	0.193
	288	U	l	C2	K3	AK004394	Lrrn4cl	19 A	1q43	11q12.3	2197	0.351
	289	U	d	C4	K2	AK011126	Lsm12	11 D	10q32.1	17q21.31	13933	0
	290	U	d	C2	K5	NM_008521	Ltc4s	11 B1.1-B1.2	10q22	5q35	13424	0.091
	291	U	k	C3	K2	AK018160	March3	18	18q12.1	5q23.2	13223	0.079
	292	U	l	C2	K3	NM_008555	Masp1	16 B2-B3	11q23	3q27-q28	7057	0.093
	293	U	l	C2	K3	NM_010769	Matn1	4 61.0 cM	5q36	1p35	4547	0.085
	294	U	d	C4	K2	AK013379	Mctp1	13 C1	2q11	5q15	1157	0.033
	295	U	l	C2	K3	AK006484	Metap1	3 G3	2q44	4q23	7660	0.013
	296	U	d	C2	K3	NM_019946	Mgst1	6 G1	4q44	12p12.3-p12.1	5613	0.162
	297	U	c	C2	K5	NM_010798	Mif	10 40.9 cM	20p12	22q11.23	4793	0.06
	298	U	d	C4	K2	NM_008611	Mmp8	9 A1	8q11	11q22.3	13290	0.225
	299	U	l	C2	K3	NM_019579	Mpp5	12 C3	6q24	14q23.3	10677	0.022
	300	U	l	C2	K3	NM_007962	Mpzl2	9 26.0 cM	8q22	11q24	12276	0.175
	301	U	f	C2	K3	NM_026310	Mrpl18	17 A2	1q11	6q25.3	804	0.122
	302	U	b	C2	K3	AK012143	Mrpl55	11 B2	10q22	1q42.13	49	0.323
	303	U	k	C3	K2	NM_025369	Mrps36	13 D1	2q12	5q13.2	2123	0.13
	304	U	f	C2	K3	AK010766	Mtif2	11 A4	14q22	2p14-p16	13830	0.176
	305	U	d	C4	K2	X65980	Mylc2pl	5 G1	12q12	7q22.1	9850	0.211
	306	U	i	C2	K3	AK008176	Myo1a	10 70.0 cM	7q22	12q13-q14	11659	0.084
	307	U	k	C3	K2	BC011162	Ncald	15 11.0 cM	7q22	8q22.2	7008	0.001
	308	U	l	C2	K3	NM_025987	Ndufa6	15 E2	7q34	22q13.2-q13.31	15401	0.112
	309	U	k	C3	K2	AK004522	Ndufb9	15 D2	7q33	8q13.3	12987	0.106
	310	U	e	C2	K3	NM_008710	Nnt	13 64.0 cM	2q16	5p13.1-cen	10648	0.047
	311	U	a	C2	K5	NM_008713	Nos3	5 9.0 cM	4q11	7q36	46	0.039
	312	U	a	C6	K5	NM_024435	Nts	10 D1	7q13	12q21	9123	0.17
	313	U	d	C4	K2	BC006631	Numa1	7 E3	1q32	11q13	12003	0.143
	314	U	h	C2	K3	AK003042	Oxt	2 F1; 2 73.5 cM	3q36	20p13	1291	0.083
	315	U	a	C6	K5	BC012520	Pank4	4 E2	5q36	1p36.32	10600	0.052
	316	U	c	C2	K3	NM_020005	Pcaf	17 30.0 cM	9q11	3p24	10812	0.045
	317	U	a	C2	K3	NM_008796	Pctp	11 52.0 cM	10q26	17q21-q24	14111	0.166
	318	U	k	C3	K2	NM_021396	Pdcd1lg2	19 C2-C3	1q52	9p24.2	5388	0.207
	319	U	j	C2	K3	NM_011069	Pex11b	3 F2.1	2q34	1q21.1	14159	0.061
	320	U	a	C2	K3	NM_009344	Phlda1	10 D1	7q21	12q15	3750	0.064
	321	U	k	C3	K2	NM_013629	Phtf1	3 F2.2	2q34	1p13	13249	0.049
	322	U	a	C2	K5	NM_010726	Phyh	2 A1	17q12.3	10p13	11819	0.215
	323	U	d	C4	K2	AB054591	Pip5k2c	10 D3	7q22	12q13.3	10491	0.03
	324	U	d	C4	K2	AK019494	Plb1	5 B1	N/A	2p23.2	17587	0.237
	325	U	n	C3	K3	NM_008883	Plxna3	X 29.86 cM	Xq37	Xq28	13279	0.034
	326	U	o	C3	K2	NM_011139	Pou2f3	9 23.0 cM	8q22	11q23.3	10673	0
	327	U	a	C2	K5	U89924	Ppp1r3c	19 C3	1q53	10q23-q24	2298	0.1
	328	U	k	C3	K2	NM_007548	Prdm1	10 27.0 cM	20q13	6q21-q22.1	10456	0.082
	329	U	k	C3	K2	NM_016914	Prg3	2 50.0 cM	3q24	11q12	12109	0.444
	330	U	d	C2	K5	BC006909	Prr14	7 F3	1q36	16p11.2	10742	0.202
	331	U	a	C2	K3	AF263365	Rab3d	9 A2-A3	8q13	19p13.2	13714	0.038
	332	U	n	C3	K2	AF387322	Rbm9	15 E1	7q34	22q13.1	4607	0.028
	333	U	k	C3	K2	BC003224	Rcbtb2	14 D3	15p11	13q14.3	10341	0.031
	334	U	f	C2	K5	AF330197	Rnf111	9 39.0 cM	8q24	15q21	2159	0.067
	335	U	c	C2	K3	AK009420	Rnf113a2	12 D1	6q31	14 / Xq25-q26	12515	0.063
	336	U	a	C2	K5	NM_009154	Sema5a	15 19.7 cM	2q23	5p15.2	10333	0.046
	337	U	a	C2	K5	X76290	Shh	5 16.0 cM	4q11	7q36	9231	0.056
	338	U	a	C2	K5	AK017152	Slain2	5 C3.2	14p11	4p12	902	0.058
	339	U	m	C2	K3	AF261233	Slc24a6	5 F	12q16	12q24.13	2516	0.143
	340	U	k	C3	K3	AF305211	Slc28a3	13 B1	17p14	9q22.2	8450	0.177
	341	U	a	C2	K5	AF276872	Slc5a7	17 D	9q11	2q12	9363	0.044
	342	U	i	C2	K3	AK012317	Snapc1	12 C3	6q24	14q22	9117	0.191
	343	U	a	C2	K5	AK011937	Snrnp27	6 D1	4q34	2p14	3584	0.013
	344	U	b	C2	K3	X65704	Snrpe	1 E4	8q32	1q32	14184	0.006
	345	U	o	C3	K2	NM_026506	Snrpg	6 B1	14q21	2p14	4605	0
	346	U	d	C4	K2	AK006916	Spata18	5 C3.3	14p11	4q12	11395	0.131
	347	U	k	C3	K2	NM_011488	Stat5a	11 60.5 cM	10q32.1	17q11.2	2226	0.028
	348	U	o	C3	K2	AK004757	Stk11ip	1 C3	9q33	2q35	5988	0.202
	349	U	n	C2	K3	NM_016801	Stx1a	5 G2	12q12	7q11.23	6067	0.011
	350	U	d	C4	K2	NM_017465	Sult2b1	7 B4	1q22	19q13.3	14498	0.233
	351	U	l	C2	K3	AK007086	Tbc1d21	9 C	8q24	15q24.1	2355	0.073
	352	U	o	C3	K2	AK012980	Tbx18	9 48.5 cM	8q31	6q14-q15	7138	0.056
	353	U	d	C4	K2	AK017198	Tmem188	8 C4	19p11	16q12.1	3153	0.13
	354	U	a	C2	K5	AK019807	Tmem190	7 A1	1q12	19q13.42	336	0.291
	355	U	a	C2	K5	AB030201	Tmem205	9 A3	8q13	19p13.2	13601	0.169
	356	U	a	C2	K5	AK020389	Tmhs	17 13.2 cM	20p12	6p21.31	6949	0.024
	357	U	a	C2	K3	NM_021327	Tnip1	11 B1.3	10q22	5q32-q33.1	14227	0.132
	358	U	f	C2	K3	NM_011624	Top3b	16 B1	11q23	22q11.22	7863	0.03
	359	U	n	C3	K3	M23013	Trf	9 56.0 cM	8q32	8q13	10008	0.254
	360	U	n	C3	K2	M23016	Trf	9 56.0 cM	8q32	8q13	10008	0.254
	361	U	a	C2	K5	BC003984	Triobp	15 46.6 cM	7q34	22q13.1	7389	0.075
	362	U	a	C2	K3	NM_011648	Tshr	12 37.0 cM	6q31	14q31	2421	0.104
	363	U	n	C2	K3	AK019055	Tulp4	17 3.2 cM	1q11	6q25-q26	12393 / 12450	0.023 / 0.027
	364	U	l	C2	K3	NM_007855	Twist2	1 D	9q36	2q37.3	1626	0
	365	U	o	C3	K2	AK009878	Txndc15	13 B1	17p14	5q31.1	12064	0.148
	366	U	n	C3	K6	AK003217	Txndc4	4 B1	5q22	9q31.1	11128	0.048
	367	U	o	C3	K2	AK003898	Ube2v2	16 A1	11q23	8q11.21	361	0.01
	368	U	k	C3	K2	J04761	Ubl4 / Slc10a3	X 29.9 cM / X A7.3	Xq37 / Xq37	Xq28 / Xq28	2128	0.107
	369	U	o	C3	K2	AK004971	Ugt2b1	5 E1	14p21	4q13.2	2782	0.286
	370	U	n	C3	K6	AK014101	Usp42	5 82.0 cM	12p11	7p22.1	9542	0.24
	371	U	c	C2	K5	NM_009496	Vamp1	6 56.0 cM	4q42	12p	12540	0.022
	372	U	f	C2	K3	AK005902	Wdr68	11 E1	10q32.1	17q23.3	9355	0.024
	373	U	k	C3	K2	BC005755	Wdr77	3 F2.2	2q34	1p13.2	15360	0.083
	374	U	k	C3	K2	AK017448	Wrb	16 C4	11q11	21q22.3	11731	0.057
	375	U	o	C3	K2	AF224494	Zfand2a	5 G2	12q11	7p22.3	12869	0.155
	376	U	c	C2	K3	AK017652	Zfp292	4 17.2 cM	5q21	6q15	4525	0.182
	377	U	a	C6	K5	NM_009329	Zfp354a	11 28.0 cM	10q21	5q35.3	1520	0.111
	378	U	k	C3	K3	AK017247	Zfp710	7 D3	1q31	15q26.1	4197	0.037
	379	U	h	C2	K3	NM_025594	Zmat2	18 B2	18p11	5q31.3	10002	0.003
	380	U	o	C3	K2	NM_026021	Zmynd19	2 A3	3p13	9q34.3	14786	0
	381	U	d	C4	K2	AF133818	Zranb2	3 H4	2q45	1p31	8245	0.143
	382	U	j	C3	K2	AK018741	0610011L14Rik	2 H2	3q42	20pter-q12	6762	0.075
	383	U	k	C4	K2	AB054000	1110028A07Rik (Fit1)	14 / 7 47.2 cM	15p13	14q12	6662	0.027
	384	U	k	C3	K2	BC004837	Nat15	16 A1	10q12	16p13.3	13915	0.017
	385	U	k	C3	K2	AK005692	1700007B13Rik (Pdilt)	7 F3	1q35	16p12.3	9708	0.153
	386	U	k	C3	K2	AK005702	1700007E06Rik	15 E3	7q34	22q13.33	1859	0.054
	387	U	o	C2	K3	AK005876	1700011L22Rik	8 C2	19q11	4q31.22	6591	0.519
	388	U	b	C2	K3	AK006553	1700030J22Rik	8 E1	N/A	16q23.2	596	0.483
	389	U	d	C3	K2	AK007195	1700113H08Rik	10 C2	7q13	12q23.2-q23.3	9846	0.718
	390	U	l	C2	K3	AJ293625	1810035L17Rik (Slirp)	12 E	6q31	14q24.3	14659	0.265
	391	U	d	C4	K2	AK009013	2300002M23Rik	17 B1	N/A	6p21.3	4423	0.645
	392	U	h	C2	K3	NM_025605	2400001E08Rik	7 F1	1q32	11q13.4	13708	0.019
	393	U	f	C2	K3	AK010940	2510009E07Rik (UPF0524 protein C3orf70)	16 B1	11q23	3q27.2	6463	0.031
	394	U	i	C3	K6	BC005708	2610018G03Rik (Mst4)	X A3.3	N/A	N/A	14147	0.013
	395	U	a	C6	K5	AK014261	3110079O15Rik (Uncharacterized protein C2orf82 homolog)	1 C5	9q35	2q37.1	9593	0.121
	396	U	c	C2	K3	BC009092	3300001P08Rik (Crop)	11 C	5q22	17q21.33	378	0.02
Orthologous to rat	1	D	k	C1	K1	NM_013778	Akr1c13	13 A1	17q12.3	N/A	16239	0.086
	2	D	o	C1	K4	AK013412	Ccdc137	11 E2	N/A	17q25.3	16203	0.084
	3	D	j	C1	K1	NM_007814	Cyp2b19	7 7.3 cM	N/A	N/A	16189	0.143
	4	D	e	C5	K1	BC009134	Dock9	14 67.0 cM	15q25	13q32.3	17786 / 13101	0.016 / 0.050
	5	D	k	C1	K4	AK007483	Nradd	9 F2	8q32	15q22	17500	0.109
	6	D	k	C1	K4	X56574	Rarb	14 A1-A3	15	3p24	16257	0.007
	7	D	k	C1	K4	AF251268	Slc5a4b	10 C1	20p12	N/A	17499	0.221
	8	D	n	C3	K6	NM_011561	Tdg	10 43.0 cM	7q13	12q24.1	17836 / 8884	0.080 / 0.134
	9	D	d	C1	K1	AK018228	Tmem29	X F3	X	Xp11.22	16068	0.169
	10	D	n	C1	K1	AK008890	Zfp84	7 9.0 cM	1q21	19	18692	0.075
	11	D	k	C1	K4	NM_026670	Zmym1	4 D2.2	5q36	1p34.3	16014	0.161
	12	U	e	C2	K3	AK015631	4930486G11Rik (UPF0623 protein)	9 E1	N/A	N/A	15819	0.164
	13	U	a	C2	K5	AK014386	Akap5	12 C3	6q24	14q21-q24	16816	0.224
	14	U	k	C4	K2	NM_025545	Aptx	4 B1	5q22	9p13.3	17234 / 13595	0.071 / 0.160
	15	U	o	C3	K2	BC015290	Ces2	8 D3	1q55	16q22.1	17781	0.162
	16	U	a	C4	K2	NM_007784	Csn1s1	5 44.9 cM	14p21	4q21.1	18250	0.208
	17	U	k	C3	K2	NM_007785	Csn1s2a	5 44.93 cM	14p21	4q13.3	16945	0.289
	18	U	j	C2	K3	NM_019728	Defb4	8 A1.3	16q12.5	8p23.1-p22	17356	0.347
	19	U	k	C3	K2	X16223	H2-T24	17 19.72 cM	20p12	N/A	16016	0.316
	20	U	a	C2	K5	NM_010430	Hic1	11 47.65 cM	10q24	17p13.3	18029 / 13247	0.008 / 0.045
	21	U	i	C3	K6	NM_010556	Il3	11 28.5 cM	10q22	5q31.1	16753	0.701
	22	U	d	C3	K2	AY036886	Mll3	5 A3	4q11	7q36.1	834	0.15
	23	U	c	C2	K3	BC003483	Mtss1	15 D1	7q33	8p22	14560	0.031
	24	U	d	C4	K2	NM_008765	Orc2l	1 C1.3	9q31	2q33	17773 / 3443	0.086 / 0.242
	25	U	k	C3	K2	AK005293	Phyhd1	2 B	3p12	9q34.11	16754	0.043
	26	U	b	C2	K3	AK008023	Prss32	17 10.73 cM	10q12	4	17336	0.152
	27	U	n	C3	K6	NM_011964	Psg19	7 4.0 cM	1q21	N/A	17657	0.411
	28	U	d	C2	K5	NM_009100	Rptn	3 F1-F2	2q34	1q21.3	15723	0.334
	29	U	o	C3	K2	NM_020501	Tas2r105	6 62.0 cM	4q42	N/A	18671	0.197
	30	U	k	C3	K2	NM_011709	Wap (WFDC5)	11 0.5 cM	14q21	N/A	18417	0.48
	31	U	c	C2	K5	AK004855	1300002K09Rik (Uncharacterized protein KIAA1529)	4 B1	5q22	N/A	17631	0.075
	32	U	k	C3	K2	NM_025308	1810007E14Rik	2 E5; 2 65.8 cM	N/A	N/A	18345	0.446
Orthologous to human	1	D	k	C1	K1	BC011390	Ascc3l1	2 62.2 cM	3q36	2q11.2	8946	0.003
	2	D	m	C1	K1	AK011534	Bmpr2	1 C1.3	9q31	2q33-q34	5807	0.034
	3	D	k	C1	K1	NM_016739	Caprin1	2 E2	3q32	11p13	8772	0.029
	4	D	o	C1	K4	NM_007643	Cd36	5 2.0 cM	4q11	7q11.2	7690	0.189
	5	D	o	C1	K1	D17546	Col18a1	10 41.3 cM	20p12	21q22.3	9100	0.256
	6	D	a	C5	K1	NM_010045	Darc	1 94.0 cM	13	1q21-q22	3610	0.66
	7	D	n	C1	K1	BC003957	Fam131a	16 B1	N/A	N/A	1191	0.347
	8	D	o	C1	K1	AF184275	Fbxo18	2 A1	17q12.3	10p15.1	6434	0.107
	9	D	k	C1	K1	AK021132	Gprin3	6 B3	N/A	4q22.1	4646	0.688
	10	D	k	C1	K1	NM_008366	Il2	3 19.2 cM	2q25	4q26-q27	10032	0.588
	11	D	o	C1	K4	NM_010582	Itih2	2 1.0 cM	N/A	10p15	4731	0.19
	12	D	o	C1	K4	NM_025827	Lonp2	8 C3	19p11	16q12.1	14322	0.041
	13	D	n	C1	K1	NM_011863	Papss1	3 64.5 cM	2q43	4q24	11305	0.013
	14	D	o	C1	K4	NM_008876	Pld2	11 39.0 cM	10q23.3-q24	17p13.1	9225	0.11
	15	D	k	C1	K4	AK004309	Rab3gap2	1 H5	13q26	1q41	14546	0.12
	16	D	k	C1	K4	AF312924	Ralgps2	1 H1	13q22	1q25.2	3184	0.015
	17	D	o	C1	K4	AK005212	Sdccag1	12 C3	1q21	14q22	1527	0.106
	18	D	k	C1	K4	NM_013770	Slc25a10	11 E2	10q32.3	17q25.3	7674	0.116
	19	D	l	C1	K1	NM_011475	Sprr2i	3 F1; 3 45.2 cM	N/A	N/A	7611	0.188
	20	D	k	C1	K1	AK021019	Svil	18 A1	17q12.1	10p11.2	8230	0.178
	21	D	g	C1	K1	BC005610	Tada2l	11 C	10q26	17q12-q21	13904	0.03
	22	D	k	C1	K4	AK009063	Trak1	9 71.0 cM	8q32	3p25.3-p24.1	394	0.172
	23	D	n	C1	K1	AK007445	Trim15	17 B1	20p12	6p21.3	13136	0.314
	24	D	k	C1	K1	NM_009515	Was	X 2.0 cM	Xq13	Xp11.4-p11.21	15074	0.117
	25	D	o	C1	K1	AK006118	Wdr16	11 B3	10q24	17p13.1	2503	0.456
	26	D	o	C1	K4	AB010358	Zfp317	9 A2-A3; 9 5.0 cM	2q34	1q21.3	12061	0.218
	27	D	o	C1	K4	AK013356	Zfp839	12 F2	6q32	14q32.31	12838	1.146
	28	D	k	C1	K4	AB010325	Zfp9	6 F1	4q42	10p11.21	13536	0.279
	29	U	a	C2	K5	NM_013798	Actg1	11 E2	10q32.3	17q25	1246	0
	30	U	k	C3	K2	D45850	Akr1c6	13 8.0 cM	17q12.3	N/A	1090	0.301
	31	U	k	C3	K2	AK012079	Atad2	15 D2	7q33	8q24.13	5368	0.174
	32	U	d	C4	K2	NM_015731	Atp9a	2	N/A	20q13.2	5506	0.02
	33	U	a	C2	K5	NM_007512	Atpif1	4 D2.3	5q36	1	2521	0.457
	34	U	d	C2	K3	AJ278735	Cabc1	1 H4	13q26	1q42.13	8984	0.143
	35	U	k	C3	K2	AK007908	Camta1	4 E2	5q36	1p36.31-p36.23	2817	0.062
	36	U	k	C3	K2	NM_015802	Dlc1	8 21.0 cM	16q12.2	8p22	659	0.686
	37	U	a	C2	K5	NM_007949	Ercc2	7 4.0 cM	1q21	19q13.3	6882	0.026
	38	U	c	C2	K3	AK013108	Flywch2	17 A3.3	N/A	16p13.3	5070	0.376
	39	U	a	C2	K3	NM_008107	Gdf1	8 B3.3	16p14	19p12	5787	0.414
	40	U	a	C6	K5	AK016817	Gpr39	1 E3	13q11	2q21-q22	13571	0.259
	41	U	l	C2	K3	U94423	Mef2a	7 33.0 cM	2q11	15q26	7946	0.031
	42	U	n	C2	K3	NM_008635	Mtap7	10 11.0 cM	1p12	6q23.3	14177	0.226
	43	U	f	C2	K5	NM_011856	Odz2	11 18.0 cM	10q12	5q34-q35.1	714	0.018
	44	U	d	C4	K2	NM_016798	Pdlim3	8 B1.1	16q11	4q35	14834	0.25
	45	U	d	C3	K2	NM_013630	Pkd1	17 10.4 cM	10q12	16p13.3	5797	0.269
	46	U	a	C2	K5	AK014665	Ppih	4 D	N/A	1p34.1	2853	0
	47	U	d	C4	K2	NM_009046	Relb	7 4.0 cM	N/A	19q13.32	7443	0.111
	48	U	i	C3	K6	NM_009175	St6gal1	16 15.5 cM	11q23	3q27-q28	2934	0.149
	49	U	o	C3	K3	NM_009261	Strbp	2 C1	3q11	9q33.3	15651	0.011
	50	U	f	C2	K3	AY005469	Sult1c1	17 D	9q11	2q11.1-q11.2	4131	0.303
	51	U	f	C2	K5	AF081116	Taf1	X D	Xq31	Xq13.1	13412	0.044
	52	U	d	C3	K2	NM_009369	Tgfbi	13 38.0 cM	17p14	5q31	8132	0.102
	53	U	c	C2	K3	AK008761	Tspan17	13 B2	N/A	5q35.3	9596	0.042
	54	U	a	C2	K5	AK007391	Ubr4	4 D3	5q36	1p36.13	10940	0.038
	55	U	d	C4	K2	AK014828	4921506M07Rik	12 C1	6q23	N/A	1795	1.63
	56	U	a	C2	K5	AK015837	4930519B02Rik (Fam164b (C6orf94))	10 A2	N/A	6q24.2	8733	0.294
	57	U	b	C2	K3	AK016052	4930546H06Rik (Uncharacterized protein ENSP00000365934 homolog)	17 A3.2	1q12	N/A	4954	0.509
Insufficient information (not found in RoundUp comparative genome database)	1	U	d	C4	K2	AY033771	Akap13	7 D2	1q31	15q24-q25	-	-
	2	U	k	C3	K2	BC010981	BC010981	14	N/A	N/A	-	-
	3	U	o	C3	K2	AF197136	BC017612 (UPF0443 protein C11orf75 (Protein FN5))	9 A2	8q12	11q13.3-q23.3	-	-
	4	U	f	C2	K3	AK009575	Bdh	16 B2	11q22	3q29	-	-
	5	D	h	C1	K1	NM_018883	Camkk1	11 B4	10q24	17p13.2	-	-
	6	U	m	C2	K3	NM_028120	Ccdc123	7 B2	1q21	19q13.11	-	-
	7	U	d	C4	K2	AK018096	Ccdc138	10 B4	20q11	2q13	-	-
	8	U	l	C2	K3	NM_009914	Ccr3	9 71.8 cM	8q32	3p21.3	-	-
	9	D	o	C1	K1	NM_021293	Cd33	7 23.0 cM	1	19q13.3	-	-
	10	D	l	C1	K1	Z83814	Dnahc6	6 31.0 cM	4q33	6	-	-
	11	D	k	C1	K1	AK016518	Dscam	16 70.5 cM	11q12	21q22.2	-	-
	12	U	b	C2	K3	AF351196	Dscaml1	9 B	8q22	11q23	-	-
	13	D	e	C1	K1	AJ006585	Eif2s3x-ps1	15 D3	N/A	N/A	-	-
	14	D	k	C1	K1	AK011175	Elavl3	9 A3	8q13	19p13.2	-	-
	15	D	a	C5	K1	NM_010133	En1	1 64.1 cM	Un	2q13-q21	-	-
	16	U	e	C2	K3	AJ272163	Esr1	10 A1; 10 12.0 cM	1q12	6q25.1	-	-
	17	D	k	C1	K4	AF176528	Fbxw14	9 F2	N/A	N/A	-	-
	18	U	c	C2	K3	NM_019439	Gabbr1	17 20.4 cM	20p12	6p21.31	-	-
	19	U	a	C4	K2	BC006835	Gigyf2	1 D	9q35	2q37.1	-	-
	20	D	o	C1	K1	J04610	Gm1418	6 C1	N/A	N/A	-	-
	21	U	g	C2	K3	NM_008184	Gstm6	3 F2.3	2q34	1p13.3	-	-
	22	D	k	C1	K1	AF061529	Herc2	7 27.0 cM	1q22	15q13	-	-
	23	U	d	C4	K2	NM_008305	Hspg2	4 71.4 cM	N/A	1p36.1-p34	-	-
	24	U	h	C2	K3	AF144975	Igh-VJ558	12 59.0 cM	N/A	N/A	-	-
	25	U	d	C4	K2	M16162	Igk-V23	6 30.0 cM	N/A	N/A	-	-
	26	U	c	C2	K5	AB001737	Igk-V8	6	N/A	N/A	-	-
	27	D	h	C1	K1	AK005166	Ihpk2	9 F2	8q32	3p21.31	-	-
	28	U	o	C3	K2	NM_025888	Kctd20	17 17.0 cM	20p12	6p21.31	-	-
	29	U	a	C2	K5	AK004982	Klhl5	5 C3.1	14p11	4p14	-	-
	30	U	o	C3	K2	M18613	Klk1b14-ps	7 B4; 7 23.1 cM	N/A	N/A	-	-
	31	D	o	C1	K4	M18620	Klk2-ps	7 B4; 7 20.0 cM	N/A	N/A	-	-
	32	D	k	C1	K4	NM_010649	Klra4	6 62.68 cM	N/A	N/A	-	-
	33	U	j	C3	K2	AK017442	Krtap2-4	11 D	N/A	17q12-q21	-	-
	34	D	k	C1	K1	AF133093	L1cam / Abcd1 / Ssr4 / Idh3g / Plxnb3 / Srpk3 / Ard1 / Plxn6-pending / Arhgap4 / Hcfc1 / Pdzd4 / Renbp / Avpr2	N/A	N/A	N/A	-	-
	35	D	k	C1	K1	U26790	LOC633760	14	N/A	N/A	-	-
	36	D	m	C1	K1	AF073882	Mtmr7	8 B1.2	16q12.1	8p22	-	-
	37	U	n	C3	K6	NM_008718	Npas1	7 4.0 cM	1q21	19q13.2-q13.3	-	-
	38	D	o	C1	K4	NM_010935	Npy6r	18 21.0 cM	N/A	5q31	-	-
	39	D	o	C1	K4	AK017578	Nrxn1	17 E5	6q12	2p16.3	-	-
	40	D	o	C1	K4	U06662	Ofa	N/A	N/A	N/A	-	-
	41	D	e	C5	K1	AF282301	Olfr148	9	8q22	N/A	-	-
	42	U	d	C4	K2	NM_030553	Olfr160	9 A4	N/A	N/A	-	-
	43	U	a	C5	K1	NM_020291	Olfr480	7 E3	N/A	N/A	-	-
	44	D	l	C1	K1	AF282291	Olfr926	9	N/A	N/A	-	-
	45	D	n	C1	K1	AK008055	Pard3b	1 C2	9q31	2q33.3	-	-
	46	U	i	C3	K6	NM_013788	Peg12	7 28.0 cM	1q22	N/A	-	-
	47	D	o	C1	K1	NM_011080	Phxr1	2 A1	N/A	N/A	-	-
	48	U	d	C4	K2	Z25735	Pou2f2	7	N/A	N/A	-	-
	49	D	o	C1	K4	NM_008899	Pou3f2	4 6.3 cM	5q21	6q16	-	-
	50	D	l	C1	K1	NM_007677	Psg17	7 4.0 cM	N/A	N/A	-	-
	51	U	i	C2	K3	NM_009043	Reg2	6 C3	4q33-q34	2p12	-	-
	52	U	h	C2	K3	Y10969	RGD1311093 (5430433E21Rik)	9	8q24	N/A	-	-
	53	U	d	C2	K5	AB063319	Rian (not protein)	12 F1; 12 54.5 cM	N/A	N/A	-	-
	54	U	c	C2	K5	AF357361	Rnu11 (not protein)	4 D2.3	N/A	1p35	-	-
	55	U	c	C2	K5	X56029	Rnu3a	10 B1	N/A	N/A	-	-
	56	U	c	C2	K5	M10336	Rnu5g	9 C	N/A	N/A	-	-
	57	D	a	C5	K1	U34828	Rny1	6 54.3 cM	N/A	7q36	-	-
	58	D	k	C1	K1	AF053956	Runx2	17 28.07 cM	9q12	6p21	-	-
	59	U	l	C2	K3	AK017526	Slc35d2	13 B3	17p14	9q22.32	-	-
	60	U	d	C2	K3	S74697	Span (Ms4a6d)	N/A	N/A	Xq27.1	-	-
	61	D	k	C1	K4	U96701	Spi15	N/A	N/A	N/A	-	-
	62	U	i	C3	K6	NM_027137	Sprrl7	3 F1	2q34	1q21.3	-	-
	63	D	o	C5	K4	BE571810	Sva (Sval2)	6 B2.1	4	N/A	-	-
	64	D	k	C1	K4	AJ278123	Synpo	18 D3	18q12.1	5q33.1
	65	U	c	C2	K3	AF217002	Tpcn1	5 F	12q16	12q24.13	-	-
	66	U	l	C2	K3	L14949	Trsp (not protein)	7 6.0 cM	N/A	19q13.2-q13.3	-	-
	67	D	e	C5	K1	AK016577	Ttll11	2 B	3p11	9q33.2	-	-
	68	U	i	C3	K6	U09054	Ube1y1-ps2	Y A1	N/A	N/A	-	-
	69	D	k	C1	K4	AF011414	Vmn2r42	7 4.5 cM	N/A	N/A	-	-
	70	D	k	C1	K1	NM_009495	Vmn2r-ps160	14	N/A	N/A	-	-
	71	D	o	C1	K1	AF126457	X76971	14 C2	N/A	N/A	-	-
	72	D	e	C1	K1	AB010374	Zfp712	13 B3	N/A	N/A	-	-
	73	U	i	C2	K3	AK011694	Zfp820	17 A3.3	N/A	N/A	-	-
	74	D	h	C1	K1	NM_009571	Zfy2	Y A1	N/A	N/A	-	-
Insufficient information (EST sequences)	1	U	d	C3	K2	NM_008040	Fpr-rs3	17	N/A	N/A	-	-
	2	D	o	C1	K1	D50387	Gm1068	6	N/A	N/A	-	-
	3	U	o	C3	K2	M17954	Gm1499	Un / 6	N/A	N/A	-	-
	4	U	a	C6	K5	L37414	Gm1499	Un / 6	N/A	N/A	-	-
	5	D	k	C1	K1	U22982	Gm1499	Un / 6	N/A	N/A	-	-
	6	U	o	C3	K2	X58835	Igh-1a	12	N/A	N/A	-	-
	7	U	o	C3	K3	M92338	Igh-6	12	N/A	N/A	-	-
	8	U	o	C3	K2	S72513	Igh-6	12	N/A	N/A	-	-
	9	U	a	C6	K5	AF023243	Igh-6	12	N/A	N/A	-	-
	10	U	a	C6	K5	AF093560	Igh-6	12	N/A	N/A	-	-
	11	U	a	C2	K5	U16179	Igh-6	12	N/A	N/A	-	-
	12	U	a	C2	K5	U69541	Igh-6	12	N/A	N/A	-	-
	13	U	g	C2	K3	U55455	Igh-6	12	N/A	N/A	-	-
	14	D	k	C1	K4	L02346	Igh-6	12	N/A	N/A	-	-
	15	U	k	C3	K2	M37009	Igh-6	12	N/A	N/A	-	-
	16	U	l	C2	K3	U55540	Igh-6	12	N/A	N/A	-	-
	17	U	m	C2	K3	AF093549	Igh-6	12	N/A	N/A	-	-
	18	U	o	C2	K3	Z22142	Igh-6	12	N/A	N/A	-	-
	19	U	m	C2	K3	U51457	Igh-VS107	12	N/A	N/A	-	-
	20	U	a	C2	K5	Z95478	Igk-V	6	N/A	N/A	-	-
	21	U	d	C4	K2	D29926	Igk-V	6	N/A	N/A	-	-
	22	U	d	C2	K5	D29939	Igk-V	6	N/A	N/A	-	-
	23	U	k	C3	K2	U01314	Igk-V1	6	N/A	N/A	-	-
	24	D	o	C1	K1	U55583	Igk-V34	Un / 6	N/A	N/A	-	-
	25	D	o	C1	K1	M36752	Igk-V8	6	N/A	N/A	-	-
	26	U	d	C4	K2	AB049967	Igk-V8	6	N/A	N/A	-	-
	27	D	d	C1	K1	AA255235	Rdh9	10	N/A	N/A	-	-
	28	U	a	C2	K5	U95921	Tcra	14	N/A	N/A	-	-
	29	U	c	C2	K3	Z12176	Tcrb-V13	6	N/A	N/A	-	-
Insufficient information (RIK cDNA sequences)	1	D	e	C5	K1	NM_026306	0610038D11Rik (TRM112-like protein)	19 E1	1q43	11q13.1	-	-
	2	U	k	C4	K2	AK002805	0610038L08Rik	17 A3.3	N/A	N/A	-	-
	3	U	c	C2	K5	AK002995	0710005I21Rik	N/A	N/A	N/A	-	-
	4	U	d	C4	K2	AK003015	0710007G10Rik	5	N/A	N/A	-	-
	5	U	a	C6	K5	AK003325	1110002N22Rik (UPF0629 protein C17orf42)	11 B5; 11 47.23 cM	10q26	17q11.2	-	-
	6	D	k	C1	K1	AK004153	1110038D17Rik (C22orf13 (LLN4))	10 C1	N/A	22q11.2	-	-
	7	D	k	C1	K1	AK004457	1190002N15Rik (UPF0672 protein C3orf58)	9 E3.3	8q31	3q24	-	-
	8	U	a	C2	K5	AK005119	1500002J14Rik	8	N/A	N/A	-	-
	9	D	k	C1	K1	AK005649	1700003L19Rik	16	N/A	N/A	-	-
	10	D	o	C1	K4	AK005677	1700006H21Rik	13	N/A	N/A	-	-
	11	U	a	C2	K3	AK005727	1700007J24Rik	2	N/A	N/A	-	-
	12	U	k	C3	K2	AK005813	1700010B13Rik	15	N/A	N/A	-	-
	13	U	n	C3	K3	AK005916	1700012J15Rik	6	N/A	N/A	-	-
	14	U	k	C3	K2	AK005994	1700015G11Rik	7 B5	1q22	N/A	-	-
	15	D	k	C1	K4	AK006064	1700017G19Rik	3 B	N/A	N/A	-	-
	16	D	a	C5	K1	AK006198	1700021F02Rik	5 E5	N/A	N/A	-	-
	17	D	o	C1	K4	AK006223	1700021N20Rik	19	N/A	N/A	-	-
	18	D	k	C1	K1	AK006245	1700022K14Rik	5 C3.1	N/A	N/A	-	-
	19	U	k	C3	K2	AK006325	1700025C18Rik	2	N/A	N/A	-	-
	20	U	d	C4	K2	AK015773	1700025F24Rik	10	N/A	N/A	-	-
	21	D	e	C5	K1	AK006412	1700027F06Rik	6 F2	4q42	N/A	-	-
	22	D	o	C1	K4	AK006597	1700034J04Rik	12 A1.1	N/A	N/A	-	-
	23	U	c	C2	K5	AK006642	1700039I01Rik	1 C2	N/A	N/A	-	-
	24	D	o	C1	K4	AK006651	1700040D17Rik	3 F2.1	N/A	N/A	-	-
	25	U	o	C3	K2	AK006719	1700047N06Rik	1	N/A	N/A	-	-
	26	D	o	C1	K4	AK006729	1700048J15Rik	19	N/A	N/A	-	-
	27	U	a	C6	K5	AK006745	1700049J03Rik	17	N/A	N/A	-	-
	28	U	o	C3	K2	AK006833	1700058M10Rik	8	N/A	N/A	-	-
	29	U	k	C3	K2	AK006850	1700061D14Rik	5	N/A	N/A	-	-
	30	U	d	C4	K2	AK018872	1700063I16Rik	1	N/A	N/A	-	-
	31	D	n	C1	K1	AK006873	1700063K16Rik	16 C3.1	N/A	N/A	-	-
	32	D	k	C1	K1	AK006934	1700072B07Rik	9	N/A	N/A	-	-
	33	U	d	C2	K3	AK006942	1700072O05Rik	6 F1	N/A	N/A	-	-
	34	D	o	C1	K4	AK018900	1700080C20Rik	17	N/A	N/A	-	-
	35	U	k	C3	K2	AK006961	1700081B01Rik	5	N/A	N/A	-	-
	36	D	h	C1	K1	AK006964	1700081D17Rik (Pebp4)	14 D2	15p11	8p21.3	-	-
	37	D	h	C5	K1	AK006973	1700081N11Rik	12	N/A	N/A	-	-
	38	D	o	C1	K1	AK006981	1700082O11Rik	15	N/A	N/A	-	-
	39	U	o	C3	K2	AK006997	1700084M14Rik	X C1	N/A	N/A	-	-
	40	D	k	C1	K1	AK007002	1700085B03Rik	5	N/A	N/A	-	-
	41	U	k	C3	K2	AK018948	1700112J05Rik	5	N/A	N/A	-	-
	42	U	d	C3	K2	AK007248	1700123E06Rik	8	N/A	N/A	-	-
	43	U	n	C2	K3	AK007255	1700123M08Rik	4 A1	N/A	N/A	-	-
	44	D	o	C1	K4	AK007300	1700127G19Rik	18	N/A	N/A	-	-
	45	U	a	C2	K5	AK007903	1810059C17Rik	2	N/A	N/A	-	-
	46	U	f	C2	K3	AK007969	1810073G21Rik	19	N/A	N/A	-	-
	47	D	o	C1	K1	AK008157	2010008C14Rik	6	N/A	N/A	-	-
	48	D	e	C5	K1	AK008369	2010109N14Rik	3	N/A	N/A	-	-
	49	U	l	C2	K3	AK008384	2010110K18Rik	18	N/A	N/A	-	-
	50	U	c	C2	K3	AK008577	2010317E24Rik	2 A3	3p13	9q34.3	-	-
	51	U	k	C3	K2	AK019108	2210404J11Rik	17 A2	1q12	6q27	-	-
	52	D	e	C5	K1	AK008908	2210412E05Rik	7 B4	1q22	19q13.33	-	-
	53	U	n	C3	K6	AK009512	2310026L22Rik	4	N/A	N/A	-	-
	54	U	c	C2	K3	AK009722	2310040G07Rik	5	N/A	N/A	-	-
	55	D	k	C1	K1	AK009780	2310043J07Rik	5	12q12	N/A	-	-
	56	D	o	C1	K1	AK010059	2310066D07Rik	2	N/A	N/A	-	-
	57	D	k	C1	K1	AK019114	2400009B08Rik	8 A1.1	N/A	N/A	-	-
	58	U	n	C3	K6	AK010741	2410085M17Rik	17	N/A	N/A	-	-
	59	U	l	C2	K3	AK010752	2410091C18Rik (Protein midA homolog, mitochondrial)	17 E3	6q11	2p22.2	-	-
	60	D	k	C1	K4	AK010976	2510017J16Rik	5	N/A	N/A	-	-
	61	D	h	C1	K1	AK011091	2510042H03Rik	16	N/A	N/A	-	-
	62	D	o	C1	K4	AK011250	2610001A08Rik	11	N/A	N/A	-	-
	63	D	k	C1	K4	AK011318	2610005G05Rik	16	N/A	N/A	-	-
	64	D	a	C5	K1	AK011632	2610030H06Rik (UPF0569 transmembrane protein)	X	Xq37	N/A	-	-
	65	U	d	C4	K2	AK011684	2610035F20Rik	14	N/A	N/A	-	-
	66	U	o	C3	K2	AK011866	2610203C22Rik	1	N/A	N/A	-	-
	67	U	d	C4	K2	AK011923	2610208K16Rik	4	N/A	N/A	-	-
	68	D	e	C5	K1	AK012000	2610306O10Rik	7	N/A	N/A	-	-
	69	U	c	C2	K5	AK027261	2700018L05Rik	N/A	N/A	N/A	-	-
	70	D	k	C1	K1	AK012591	2700089I24Rik	19 D3	N/A	N/A	-	-
	71	D	o	C1	K1	AK019485	2810403D21Rik	X D	N/A	N/A	-	-
	72	U	o	C3	K2	AK015504	2900005J15Rik	5 A3	N/A	N/A	-	-
	73	D	k	C1	K1	AK013565	2900021C02Rik	12	N/A	N/A	-	-
	74	D	d	C1	K1	AK013604	2900027M19Rik	8 A1.1	N/A	N/A	-	-
	75	U	i	C2	K3	AK013617	2900035J10Rik	1	N/A	N/A	-	-
	76	U	d	C3	K2	AK019328	2900037P16Rik	16	N/A	N/A	-	-
	77	U	d	C4	K2	AK013764	2900072D07Rik	4	N/A	N/A	-	-
	78	U	a	C2	K5	AK013809	2900082C11Rik	12	N/A	N/A	-	-
	79	U	n	C3	K6	AK013819	2900084I15Rik	6	N/A	N/A	-	-
	80	D	e	C5	K1	AK013906	3021401C12Rik	15	N/A	N/A	-	-
	81	U	d	C4	K2	AK013958	3110001L01Rik	10 B2	N/A	N/A	-	-
	82	D	a	C5	K1	AK014239	3110067G11Rik	3	N/A	N/A	-	-
	83	D	n	C1	K1	AK014240	3110068A07Rik	14	N/A	N/A	-	-
	84	D	o	C1	K4	AK014404	3732407C23Rik	12 A1.1	N/A	N/A	-	-
	85	D	e	C1	K1	AK019501	4632418H02Rik	9	N/A	N/A	-	-
	86	D	k	C1	K1	AK014745	4833421G17Rik	1	N/A	N/A	-	-
	87	D	h	C1	K1	AK014748	4833422B07Rik	18	N/A	N/A	-	-
	88	D	k	C1	K1	AK014882	4921513I03Rik	10 D2	N/A	N/A	-	-
	89	U	a	C6	K5	AK014901	4921515L22Rik	10	N/A	N/A	-	-
	90	U	n	C3	K6	AK014808	4921522E24Rik	2 A2	17q12.3	N/A	-	-
	91	D	o	C1	K4	AK014953	4921523P09Rik	5 E4	N/A	N/A	-	-
	92	D	l	C1	K1	AK014964	4921525B02Rik	14	N/A	N/A	-	-
	93	U	o	C3	K2	AK015066	4930403L11Rik	10	N/A	N/A	-	-
	94	D	o	C1	K4	AK015569	4930425L21Rik	6	N/A	N/A	-	-
	95	D	o	C1	K1	AK015281	4930431P22Rik	14	N/A	N/A	-	-
	96	D	h	C1	K1	AK015383	4930444M15Rik	14	N/A	N/A	-	-
	97	U	k	C3	K2	AK015453	4930453J04Rik	17	N/A	N/A	-	-
	98	U	l	C2	K3	AK015470	4930455J16Rik	13	N/A	N/A	-	-
	99	D	o	C1	K1	AK015479	4930456K20Rik	10	N/A	N/A	-	-
	100	U	c	C2	K5	AK015568	4930473O22Rik	10	N/A	N/A	-	-
	101	U	a	C2	K5	AK015610	4930482G09Rik	3	N/A	N/A	-	-
	102	U	g	C2	K3	AK019652	4930482J15Rik	13	N/A	N/A	-	-
	103	U	o	C3	K2	AK015613	4930483C13Rik	10	N/A	N/A	-	-
	104	U	l	C2	K3	AK015616	4930483K19Rik	10	N/A	N/A	-	-
	105	U	d	C4	K2	AK015632	4930486I03Rik	1	N/A	N/A	-	-
	106	D	h	C1	K1	AK019660	4930488B04Rik	2	N/A	N/A	-	-
	107	D	o	C1	K4	AK015647	4930488L21Rik	8 C5	N/A	N/A	-	-
	108	D	k	C1	K4	AK015653	4930500A05Rik	17 E4	N/A	N/A	-	-
	109	D	k	C1	K4	AK015702	4930505G20Rik	14	N/A	N/A	-	-
	110	U	a	C2	K5	AK015855	4930520O04Rik	9 F3	N/A	N/A	-	-
	111	D	e	C5	K1	AK015862	4930521G14Rik	13	N/A	N/A	-	-
	112	D	o	C1	K1	AK019691	4930522O17Rik	4 B2	N/A	N/A	-	-
	113	U	d	C4	K2	AK015902	4930526H09Rik	13	N/A	N/A	-	-
	114	U	n	C3	K6	AK015922	4930528A17Rik	4 A3	N/A	N/A	-	-
	115	D	a	C5	K1	AK015953	4930533D04Rik	9	N/A	N/A	-	-
	116	U	h	C2	K3	AK019721	4930535L15Rik	9	N/A	N/A	-	-
	117	D	k	C1	K1	AK016003	4930539N22Rik	3	N/A	N/A	-	-
	118	U	c	C2	K3	AK019729	4930540M03Rik	9	N/A	N/A	-	-
	119	U	k	C3	K2	AK019746	4930546K05Rik	9 A5.1	N/A	N/A	-	-
	120	D	j	C1	K1	AK019761	4930552P06Rik	4	N/A	N/A	-	-
	121	D	k	C1	K1	AK016146	4930556I23Rik	1	N/A	N/A	-	-
	122	D	k	C1	K4	AK016153	4930556N13Rik	11	N/A	N/A	-	-
	123	U	a	C6	K5	AK016169	4930558C23Rik	3 F2.1	N/A	N/A	-	-
	124	D	k	C1	K1	AK016326	4930579J19Rik	13	N/A	N/A	-	-
	125	D	j	C1	K4	AK016413	4930599A14Rik	1	N/A	N/A	-	-
	126	D	o	C1	K4	AK016539	4932431P20Rik	7 B1	N/A	N/A	-	-
	127	D	o	C1	K1	AK016652	4933404K08Rik	13	N/A	N/A	-	-
	128	U	n	C3	K2	AK016810	4933413N12Rik	17	N/A	N/A	-	-
	129	D	k	C1	K1	AK016828	4933416A02Rik	15	N/A	N/A	-	-
	130	D	k	C5	K1	AK016877	4933423N03Rik	17	N/A	N/A	-	-
	131	U	d	C4	K2	AK017182	5033421C21Rik	14	N/A	N/A	-	-
	132	U	d	C4	K2	AK017289	5430410E06Rik	17	N/A	N/A	-	-
	133	D	o	C1	K4	AK017319	5430419D17Rik (putative DMBT1-like protein)	7 F3	N/A	N/A	-	-
	134	D	k	C1	K1	AK017945	5830424K16Rik	X	N/A	N/A	-	-
	135	U	a	C2	K3	AK017966	5830433G22Rik	1	N/A	N/A	-	-
	136	U	d	C3	K2	AK017968	5830433M15Rik	13	N/A	N/A	-	-
	137	U	k	C3	K2	AK017972	5830436C15Rik	8	N/A	N/A	-	-
	138	D	o	C1	K1	AK018043	5830468K08Rik	3	N/A	N/A	-	-
	139	D	e	C1	K1	AK018053	5830474E16Rik	1	N/A	N/A	-	-
	140	D	o	C1	K1	AK018175	6330415B21Rik	6	N/A	N/A	-	-
	141	D	d	C5	K1	AK018225	6330532G10Rik	X	N/A	N/A	-	-
	142	U	d	C4	K2	AK020111	6720418B01Rik	3 G3	N/A	N/A	-	-
	143	D	a	C5	K1	AK020201	8030444G23Rik	16	N/A	N/A	-	-
	144	U	n	C3	K3	AK020204	8030450C14Rik	10	N/A	N/A	-	-
	145	D	o	C1	K4	AK020211	8030459D09Rik	6	N/A	N/A	-	-
	146	D	k	C1	K1	AK018427	8430419K02Rik	11	N/A	N/A	-	-
	147	U	c	C2	K3	AK020238	8430439B09Rik	X A1.1	N/A	N/A	-	-
	148	D	e	C1	K1	AK020283	9130219B18Rik	12	N/A	N/A	-	-
	149	U	m	C2	K3	AK020382	9330169L03Rik	Un	N/A	N/A	-	-
	150	D	i	C1	K1	AK020464	9430041J12Rik	7	N/A	N/A	-	-
	151	D	o	C1	K4	AK020584	9530034A14Rik	3	N/A	N/A	-	-
	152	U	a	C6	K5	AK020709	A230103L15Rik	7	N/A	N/A	-	-
	153	U	i	C2	K3	AK020861	A930015G24Rik	6	N/A	N/A	-	-
	154	U	d	C4	K2	AK020918	A930032L01Rik	13	N/A	N/A	-	-
	155	U	a	C6	K5	AK020940	A930037H05Rik	11	N/A	N/A	-	-
	156	D	o	C1	K4	AK020947	A930040O22Rik	12	N/A	N/A	-	-
	157	U	f	C2	K5	AK020990	B230206I08Rik	7	N/A	N/A	-	-
	158	U	f	C2	K3	AK018341	B230217C12Rik	11 D	N/A	N/A	-	-
	159	U	a	C6	K5	AK021034	B830042I05Rik	8	N/A	N/A	-	-
	160	U	f	C2	K3	AK021065	C030011I16Rik	17	N/A	N/A	-	-
	161	D	o	C1	K1	AK021079	C030014C12Rik	12	N/A	N/A	-	-
	162	U	d	C4	K2	AK021087	C030017B01Rik	18	N/A	N/A	-	-
	163	D	k	C5	K1	AK021114	C030032G21Rik	4	N/A	N/A	-	-
	164	U	g	C2	K3	BC007193	C130026I21Rik	1 C5	N/A	N/A	-	-
	165	U	k	C3	K2	AK021269	C530007A02Rik	4	N/A	N/A	-	-
	166	D	o	C1	K4	AK021303	D530031A16Rik	16	N/A	N/A	-	-
	167	D	c	C5	K1	AK021311	D530037P16Rik	3	N/A	N/A	-	-
	168	U	a	C2	K5	AK021366	E130102B10Rik	16	N/A	N/A	-	-
Unknown identifiers	1	D	m	C1	K1	AK006784	N/A	2	N/A	N/A	-	-
	2	D	k	C1	K1	AK014764	N/A	3	N/A	N/A	-	-
	3	D	o	C1	K4	AF120319	N/A	11	N/A	N/A	-	-
	4	U	d	C4	K2	L05518	N/A	12	N/A	N/A	-	-
	5	U	d	C4	K2	M57991	N/A	12	N/A	N/A	-	-
	6	U	d	C4	K2	M94020	N/A	12	N/A	N/A	-	-
	7	U	k	C3	K2	AJ278073	N/A	12	N/A	N/A	-	-
	8	U	k	C3	K2	U09591	N/A	12	N/A	N/A	-	-
	9	D	k	C1	K1	X66664	N/A	12	N/A	N/A	-	-
	10	U	k	C3	K2	Z33491	N/A	12	N/A	N/A	-	-
	11	U	o	C3	K2	AF163744	N/A	12	N/A	N/A	-	-
	12	U	l	C2	K3	AF283284	N/A	14	N/A	14q11.2	-	-
	13	U	o	C3	K2	L19609	N/A	18	N/A	N/A	-	-
	14	U	k	C2	K3	M73551	N/A	Un / 14	N/A	N/A	-	-
	15	D	o	C1	K4	M24786	N/A	N/A	N/A	N/A	-	-
	16	D	o	C1	K1	M29244	N/A	N/A	N/A	N/A	-	-
	17	U	a	C2	K3	AF041944	N/A	N/A	N/A	N/A	-	-
	18	U	a	C2	K5	AF041973	N/A	N/A	N/A	N/A	-	-
	19	U	a	C2	K3	AF050425	N/A	N/A	N/A	N/A	-	-
	20	U	a	C2	K5	AF073933	N/A	N/A	N/A	N/A	-	-
	21	U	a	C2	K3	AJ007954	N/A	N/A	N/A	N/A	-	-
	22	D	a	C5	K1	AJ409493	N/A	N/A	N/A	N/A	-	-
	23	U	a	C2	K5	Z12430	N/A	N/A	N/A	N/A	-	-
	24	U	c	C2	K5	NM_029392	N/A	N/A	N/A	N/A	-	-
	25	U	d	C3	K2	AF059702	N/A	N/A	N/A	N/A	-	-
	26	U	d	C4	K2	AF093554	N/A	N/A	N/A	N/A	-	-
	27	U	d	C4	K2	M63673	N/A	N/A	N/A	N/A	-	-
	28	U	d	C4	K2	M92400	N/A	N/A	N/A	N/A	-	-
	29	U	d	C2	K3	X04211	N/A	N/A	N/A	N/A	-	-
	30	U	d	C4	K2	X17173	N/A	N/A	N/A	N/A	-	-
	31	U	d	C4	K2	X66656	N/A	N/A	N/A	N/A	-	-
	32	D	e	C5	K1	AJ409484	N/A	N/A	N/A	N/A	-	-
	33	D	e	C5	K1	X16216	N/A	N/A	N/A	N/A	-	-
	34	U	f	C2	K3	M18091	N/A	N/A	N/A	N/A	-	-
	35	U	h	C2	K3	AF041943	N/A	N/A	N/A	N/A	-	-
	36	U	j	C2	K3	S58460	N/A	N/A	N/A	N/A	-	-
	37	U	k	C3	K2	AB043424	N/A	N/A	N/A	N/A	-	-
	38	U	k	C3	K2	AF000918	N/A	N/A	N/A	N/A	-	-
	39	D	k	C1	K4	AF016710	N/A	N/A	N/A	N/A	-	-
	40	U	k	C3	K2	AF062757	N/A	N/A	N/A	N/A	-	-
	41	D	k	C5	K1	AF357494	N/A	N/A	N/A	N/A	-	-
	42	U	k	C3	K2	AK005737	N/A	N/A	N/A	N/A	-	-
	43	D	k	C1	K1	M18342	N/A	N/A	N/A	N/A	-	-
	44	D	k	C1	K1	M31445	N/A	N/A	N/A	N/A	-	-
	45	D	k	C1	K1	M93663	N/A	N/A	N/A	N/A	-	-
	46	U	k	C3	K2	S59139	N/A	N/A	N/A	N/A	-	-
	47	U	k	C3	K3	X04231	N/A	N/A	N/A	N/A	-	-
	48	U	k	C3	K3	Z12376	N/A	N/A	N/A	N/A	-	-
	49	U	n	C3	K3	Z12453	N/A	N/A	N/A	N/A	-	-
	50	D	o	C1	K4	AF357458	N/A	N/A	N/A	N/A	-	-
	51	D	o	C1	K1	X51742	N/A	N/A	N/A	N/A	-	-
