# Supplementary material for: Identification of Putative Ortholog Gene Blocks Involved in Gestant and Lactating Mammary Gland Development: A Rodent Cross-Species Microarray Transcriptomics Approach
Source: Int J Genomics. 2013 Oct 30;2013:624681. doi: 10.1155/2013/624681 (PMC3830774; doi:10.1155/2013/624681)
Supplement: Supplementary file 1 — This manuscript contains supplementary material to give a better overview of the results. In Table S1 we are describing the experimental design of heterologous microarrays hybridization; in Table S2 we showed the primers and probes for the qRT-PCR analysis for confirmation of microarray results. In S3 we are showing the list of up- and downregulated genes during pregnancy (P5, P14) and/or lactation (L1, L12) that shared spatial and temporal distributions. In S4 we described all the gene hierarchical cluster sets of altered gene transcript. In S5 is the list of altered gene transcript K-means cluster sets that correspond to potential groups of co-regulated genes. K-means clustering revealed six distinct clusters (K1-6) that distinguished up from down, early from middle, and transient from sustained changes in expression. The data from Table S6 shows the list of orthologous significant altered gene transcripts to rat and/or human in pregnancy (day 5 and 14) and lactancy (day 1 and 12). The Table S7 shows the list of families of transcription factors identified in different stage development of mammary gland. Finally in Table S8 we are describing the functional gene blocks detailed information. [file 624681.f1.zip › 624681.f7.xls]

## Sheet: Table S8
Table S7. Transcription factors, hormones and related receptor altered gene transcript expression profiles in mammary gland development.
Functional Domain Category	Flag				Gene				Developmental stage (mean z-score)
	Vdiagram		Hcluster	Kcluster	NCBI ID	Official Symbol	UniProtKB/Swiss-Prot ID*	Name	P5	P14	L1	L12
Zinc finger	D	e	C5	K1	X06746	Egr2	P11161	early growth response 2	-1.4989	-1.31142	-2.09492	-2.345
	U	k	C3	K2	NM_010296	Gli	P08151	GLI-Kruppel family member GLI1	-1.03372	0.99728	1.76734	1.50003
	U	a	C2	K5	NM_010430	Hic1	Q14526	hypermethylated in cancer 1	2.52187	2.85612	2.00965	1.61193
	U	k	C3	K2	NM_007548	Prdm1	O75626	PR domain containing 1, with ZNF domain	-0.619332	0.951474	1.72179	1.72776
	U	h	C2	K3	NM_025594	Zmat2	Q96NC0	zinc finger, matrin type 2	1.96938	1.44081	1.48062	2.01419
	D	o	C1	K4	AK020870	Zbtb20	Q9HC78	zinc finger and BTB domain containing 20	-0.540623	-0.685006	-1.15634	-2.02918
	D	k	C1	K4	NM_026670	Zmym1	Q5SVZ6	zinc finger, MYM domain containing 1	-0.802981	-0.802993	-1.68606	-1.91526
	U	o	C3	K2	NM_026021	Zmynd19	Q96E35	zinc finger, MYND-type containing 19	0.398243	0.729022	0.957309	1.60683
	U	o	C3	K2	AF224494	Zfand2a	Q8N6M9	zinc finger, AN1-type domain 2A	-0.524738	1.01243	1.44094	1.54362
	U	d	C4	K2	AF133818	Zranb2	O95218	zinc finger, RAN-binding domain containing 2	0.298391	3.04832	2.15281	2.29925
	D	h	C1	K1	NM_009571	Zfy2	P08048	zinc finger protein 2, Y linked	-1.57328	-1.31247	-1.44776	-1.98187
	D	k	C1	K4	AB010325	Zfp9	P17030	zinc finger protein 9	-0.212431	-0.752299	-1.58295	-1.7565
	D	e	C5	K1	M36516	Zfp28	Q8NHY6	zinc finger protein 28	-1.72329	-1.45797	-1.73124	-2.2731
	D	o	C1	K4	U29508	Zfp72	Q16587	zinc finger protein 72	0.258745	-0.265828	-0.753904	-1.84209
	D	n	C1	K1	U29511	Zfp78	P52742	zinc finger protein 78	-1.3536	-1.02465	-1.4781	-1.44816
	D	n	C1	K1	AK008890	Zfp84	P51523	zinc finger protein 84	-1.45108	-0.94429	-1.54857	-1.42677
	D	j	C1	K1	AB010319	Zfp287	Q9HBT7	zinc finger protein 287	-0.909526	-1.83332	-1.43688	-2.06096
	U	c	C2	K3	AK017652	Zfp292	O60281	zinc finger protein 292	1.66044	1.4968	1.65088	0.342969
	D	o	C1	K4	AB010358	Zfp317	Q96PQ6	zinc finger protein 317	-0.58439	-0.472182	-1.37056	-2.19462
	D	o	C1	K1	NM_018759	Zfp326	Q5BKZ1	zinc finger protein 326	-1.02467	-1.34135	-1.32825	-1.94091
	U	a	C6	K5	NM_009329	Zfp354a	O60765	zinc finger protein 354A	2.12366	2.58155	3.28994	2.5417
	U	k	C3	K3	AK017247	Zfp710	Q8N1W2	zinc finger protein 710	0.926083	1.29977	1.68909	1.82234
	D	e	C1	K1	AB010374	Zfp712	O89111	zinc finger protein 712	-1.53661	-1.46757	-1.59194	-1.81968
	U	i	C2	K3	AK011694	Zfp820	Q8VEC1	zinc finger protein 820	1.1136	1.75212	1.56935	0.775153
	D	o	C1	K4	AK013356	Zfp839	-	zinc finger protein 839	-	-	-	-
POU domain	D	a	C5	K1	NM_011136	Pou2af1	Q16633	POU domain, class 2, associating factor 1	-1.99565	-1.63589	-1.96805	-2.28014
	U	d	C4	K2	Z25735	Pou2f2	P09086	POU domain, class 2, transcription factor 2	-0.686217	2.04303	3.79772	3.82194
	U	o	C3	K2	NM_011139	Pou2f3	Q9UKI9	POU domain, class 2, transcription factor 3	-0.239271	0.147351	1.04816	1.81795
	D	o	C1	K4	NM_008899	Pou3f2	P20265	POU domain, class 3, transcription factor 2	-0.715349	-0.26978	-1.28234	-2.29853
Homeo domain	U	k	C3	K2	AF247663	Hoxa6	P31267	homeo box A6	1.10845	0.783121	1.69173	2.16756
	D	b	C1	K1	Z16406	Meox2	P50222	mesenchyme homeobox 2	-1.53625	-1.56703	-1.09112	-1.82337
	U	k	C3	K2	NM_013629	Phtf1	Q9UMS5	putative homeodomain transcription factor 1	0.531571	1.06122	2.16396	2.02361
	U	a	C2	K5	X76290	Shh	Q15465	sonic hedgehog	2.25732	2.01024	1.98783	2.15353
	D	a	C5	K1	NM_010133	En1	Q05925	engrailed 1	-1.82165	-1.70988	-2.34897	-3.46173
	U	d	C3	K2	NM_007770	Crx	O43186	cone-rod homeobox containing gene	0.357502	1.95284	2.36157	1.91732
Forkhead	U	k	C3	K2	NM_023907	Foxi1	Q12951	forkhead box I1	-0.24714	0.433268	2.6692	2.36039
	U	b	C2	K3	X76684	Foxa1	P55317	forkhead box A1	1.61676	2.36133	2.1439	2.05667
Ring finger	U	f	C2	K5	AF330197	Rnf111	Q6ZNA4	ring finger protein 111	2.70709	3.1048	1.26596	-0.0466819
	U	c	C2	K3	AK009420	Rnf113a2	O15541	ring finger protein 113A2	1.94228	1.92637	2.11968	0.662735
	D	d	C5	K1	AK012956	Rnf216	Q9NWF9	ring finger protein 216	-0.996002	-2.11498	-2.38009	-2.54389
Others	D	k	C1	K1	AF053956	Runx2	Q13950	runt-related transcription factor 2	-1.29441	-1.19687	-1.67779	-1.78567
	U	l	C2	K3	U94423	Mef2a	Q02078	myocyte enhancer factor 2A	1.96689	1.46607	1.3516	0.995131
	D	o	C1	K4	AF254422	Pax7	P23759	paired box gene 7	-1.14883	-0.513122	-0.848549	-1.73167
	D	k	C1	K4	NM_013926	Cbx8	Q9HC52	chromobox homolog 8 (Drosophila Pc class)	0.361659	-0.966287	-1.78643	-1.52624
	U	o	C3	K2	AK012980	Tbx18	O95935	T-box18	-0.513509	0.326383	1.40262	2.32673
	U	k	C3	K2	NM_011488	Stat5a	P42229	signal transducer and activator of transcription 5A	-0.993792	0.277832	1.72773	1.89187
	U	d	C4	K2	NM_009046	Relb	Q01201	avian reticuloendotheliosis viral (v-rel) oncogene related B	-0.426408	3.70491	3.83052	4.03939
	U	c	C2	K3	AF287260	Creb3l4	Q8TEY5	cAMP responsive element binding protein 3-like 4	1.61141	1.49827	1.64128	1.46645
	D	k	C1	K1	AK006438	Eid3	Q8N140	EP300 interacting inhibitor of differentiation 3	-1.33718	-1.22378	-1.94295	-1.98626
	U	f	C2	K3	NM_010423	Hey1	Q9Y5J3	hairy/enhancer-of-split related with YRPW motif 1	1.7754	1.91768	1.07885	1.41498
Retinoic acid	D	k	C1	K4	X56574	Rarb	P10826	retinoic acid receptor, beta	-0.273385	-0.593489	-1.5537	-1.3958
	D	o	C1	K4	M32070	Rarg	P13631	retinoic acid receptor, gamma	-0.462045	-0.626622	-1.15976	-1.8283
Estrogen	U	e	C2	K3	AJ272163	Esr1	P03372	estrogen receptor 1 (alpha)	2.26515	1.24296	1.58828	1.50314
	U	c	C2	K3	NM_010157	Esr2	Q92731	estrogen receptor 2 (beta)	1.85397	1.66226	1.77124	1.31086
Ephrin	U	k	C4	K2	NM_007680	Ephb6	O15197	Eph receptor B6	-0.323058	1.4444	2.49013	2.28734
	D	l	C1	K1	AK013481	Epha4	P54764	Eph receptor A4	-2.00892	-1.06616	-1.06231	-1.28641
Interleukin	D	k	C1	K1	NM_008366	Il2	P60568	interleukin 2	-1.17486	-1.0835	-1.55455	-1.98287
	U	i	C3	K6	NM_010556	Il3	P08700	interleukin 3	-0.348706	2.03441	2.7848	0.924504
	U	a	C2	K5	NM_008374	Il9r	Q01113	interleukin 9 receptor	2.81288	2.40936	2.01436	1.5711
Insulin	U	i	C2	K3	NM_013754	Insl6	Q9Y581	insulin-like 6	1.31208	2.12606	1.73585	1.00596
Others	U	a	C2	K3	NM_008107	Gdf1	P27539	growth differentiation factor 1	2.17964	1.57106	1.7053	1.73693
	D	m	C1	K1	AK011534	Bmpr2	Q13873	bone morphogenetic protein receptor, type II (serine/threonine kinase)	-1.0362	-1.93689	0.236301	-1.14477
	U	a	C2	K3	NM_011648	Tshr	P16473	thyroid stimulating hormone receptor, transcript variant 1	1.60064	2.01547	1.63964	1.55449
	U	d	C4	K2	NM_009633	Adra2b	P18089	adrenergic receptor, alpha 2b	-0.868188	1.6871	2.23627	2.43646
	D	k	C1	K4	NM_010323	Gnrhr	P30968	gonadotropin releasing hormone receptor	-0.929247	-0.595289	-1.53925	-1.90124
	D	o	C1	K4	NM_010935	Npy6r	Q99463	neuropeptide Y receptor Y6	-1.153	-0.854536	-0.41673	-1.77289
	U	a	C6	K5	S37484	Agtr1a	P30556	angiotensin II receptor isoform 1a	2.87	2.53694	3.04778	2.36193
	U	h	C2	K3	AK003042	Oxt	P01178	oxytocin	1.68111	1.02169	1.29979	1.5142
	U	a	C2	K5	NM_008713	Nos3	P29474	nitric oxide synthase 3, endothelial cell	1.62563	2.22891	1.7173	1.87943
