# Supplementary material for: Identification of Putative Ortholog Gene Blocks Involved in Gestant and Lactating Mammary Gland Development: A Rodent Cross-Species Microarray Transcriptomics Approach
Source: Int J Genomics. 2013 Oct 30;2013:624681. doi: 10.1155/2013/624681 (PMC3830774; doi:10.1155/2013/624681)
Supplement: Supplementary file 1 — This manuscript contains supplementary material to give a better overview of the results. In Table S1 we are describing the experimental design of heterologous microarrays hybridization; in Table S2 we showed the primers and probes for the qRT-PCR analysis for confirmation of microarray results. In S3 we are showing the list of up- and downregulated genes during pregnancy (P5, P14) and/or lactation (L1, L12) that shared spatial and temporal distributions. In S4 we described all the gene hierarchical cluster sets of altered gene transcript. In S5 is the list of altered gene transcript K-means cluster sets that correspond to potential groups of co-regulated genes. K-means clustering revealed six distinct clusters (K1-6) that distinguished up from down, early from middle, and transient from sustained changes in expression. The data from Table S6 shows the list of orthologous significant altered gene transcripts to rat and/or human in pregnancy (day 5 and 14) and lactancy (day 1 and 12). The Table S7 shows the list of families of transcription factors identified in different stage development of mammary gland. Finally in Table S8 we are describing the functional gene blocks detailed information. [file 624681.f1.zip › 624681.f8.xls]

## Sheet: Table S7
Table S8. Functional gene blocks detailed information.
Gene Block	Flag			Gene		KEGG SP	GO terms			Gene RIFs	Developmental stage (mean z-score)				Chromosomal Loci			RoundUp Ortholog Database		% Identity Rn vs Mm		% Identity Hs vs Mm		GRIMM Synteny Region (1 Mb)							GRIMM Synteny Region (300 Kb)
	Vdiagram	Hcluster	Kcluster	NCBI ID	Official Symbol		BP	MF	CC		P5	P14	L1	L12	Mm	Rn	Hs	#Phylogenetic Profile	Average Distance	AA	NT	AA	NT	#Cluster	Mm.start	Mm.end	Rn.start	Rn.end	Hs.start	Hs.end	#Cluster	Mm.start	Mm.end	Rn.start	Rn.end	Hs.start	Hs.end
U1	a	C2	K3	NM_011648	Tshr	Neuroactive ligand-receptor interaction,	signal transduction, positive regulation of cell proliferation, regulation of locomotion, positive regulation of multicellular organismal growth	thyroid-stimulating hormone receptor activity	plasma membrane	Pituitary folliculo-stellate cells express functional TSHR not coupled to cAMP nor IP3 but probably signals through JAK/STAT5a pathway. In vitro model to study role of TSHR in pituitary folliculo-stellate cells [Brokken et al., 2005].	1.60064	2.01547	1.63964	1.55449	12 37.0 cM	6q31	14q31	2421	0.104	94.2	92.8	86.8	86.2	196	65619090	107480633	93104682	138457196	56715272	104300250	262	65619090	107335391	93104682	138275668	56715272	104044380
	l	C2	K3	AJ293625	1810035L17Rik	-	regulation of transcription, DNA-dependent	RNA-binding, nucleic acid binding	mitochondrion, nucleus	Steroid receptor RNA activator (SRA, or SRA1; MIM 603819) is a complex RNA molecule containing multiple stable stem-loop structures that functions in coactivation of nuclear receptors. SLIRP interacts with stem-loop structure-7 of SRA (STR7) and modulates nuclear receptor transactivation [Hatchell et al., 2006]. Our data demonstrate that SLIRP modulates NR transactivation, suggest it may regulate…	1.74583	0.456407	0.601072	1.11498	12 E	6q31	14q24.3	14659	0.265	88.1	91.4	70.8	78	196	65619090	107480633	93104682	138457196	56715272	104300250	262	65619090	107335391	93104682	138275668	56715272	104044380
	c	C2	K3	AK009420	Rnf113a2	-	putative regulation of transcription	zinc ion binding	-	-	1.94228	1.92637	2.11968	0.662735	12 D1	6q31	14 / Xq25-q26	12515	0.063	97.3	94.1	91.3	85.1	196	65619090	107480633	93104682	138457196	56715272	104300250	262	65619090	107335391	93104682	138275668	56715272	104044380
	l	C2	K3	NM_019579	Mpp5	Tight junction	-	protein binding	cell junction, tight junction, cytoplasm, nucleus, plasma membrane	The importance of a conserved Crumbs-MPP5-EPB41L5 polarity complex in mammals for separation of the apical and basolateral domains through specialized cell-cell junctions [Gosens et al., 2007]. Members of the peripheral membrane-associated guanylate kinase (MAGUK) family function in tumor suppression and receptor clustering by forming multiprotein complexes containing distinct sets of transmembra…	1.64008	0.807003	0.628654	0.666601	12 C3	6q24	14q23.3	10677	0.022	99	95.9	96.7	91.5	196	65619090	107480633	93104682	138457196	56715272	104300250	262	65619090	107335391	93104682	138275668	56715272	104044380
	c	C2	K3	NM_010157	Esr2	-	signal transduction, regulation of transcription, DNA-dependent, negative regulation of cell growth, cell-cell signaling	estrogen receptor activity, transcription factor activity (coactivator),	mitochondrion, nucleus	Biological functions and clinical implications of oestrogen receptors alfa and beta in epithelial tissues [Review: Morani et al., 2008].	1.85397	1.66226	1.77124	1.31086	12 33.0 cM	6q24	14q23.2	516	0.076	95.1	94	88.7	84.7	196	65619090	107480633	93104682	138457196	56715272	104300250	262	65619090	107335391	93104682	138275668	56715272	104044380
	i	C2	K3	AK012317	Snapc1	-	regulation of transcription, DNA-dependent	DNA binding	nucleus	Cooperation between small nuclear RNA-activating protein complex (SNAPC) and TATA-box-binding protein antagonizes protein kinase CK2 inhibition of DNA binding by SNAPC [Gu et al., 2006]. CK2 may have the capacity to differentially regulate U1 and U6 transcription even though SNAP(C) is universally utilized for human snRNA gene transcription [SNAPC protein, also called PTF or PSE-binding transcrip…	1.14361	1.91074	2.2937	1.45816	12 C3	6q24	14q22	9117	0.191	90.7	89.8	77.9	80.3	196	65619090	107480633	93104682	138457196	56715272	104300250	262	65619090	107335391	93104682	138275668	56715272	104044380
	b	C2	K3	X76684	Foxa1	-	regulation of transcription, DNA-dependent, epithelial cell differentiation, branching morphogenesis of a tube, glucose homeostasis	transcription factor activity	nucleus	FOXA1 protein is associated with markers of good prognosis supporting its role as a growth repressor in breast cancer [Habashy et al., 2008]. Our present results suggest that FoxA1 plays an important role as a lineage-specific oncogene in proliferation of cancer cells derived from mammary luminal cells [Yamaguchi et al., 2008]. The knockdown of FoxA1 expression blocks the association of ER with c…	1.61676	2.36133	1.03795	2.05667	12 26.0 cM	6q23-q24	14q12-q13	6638	0.047	95.5	94.3	95.7	91.7	195	38897334	65541375	64079402	93038464	23164267	50195833	261	38897334	65541375	64079402	93038464	23164267	50195833
U3	f	C2	K3	AK005902	Wdr68	-	-	protein binding	cytoplasm	physiological regulator of GLI1 (Hedgehog) transcriptional activity; flavonoid biosynthesis [Morita et al., 2006].	2.21096	2.34146	0.363762	-0.136312	11 E1	10q32.1	17q23.3	9355	0.024	100	95.6	100	92	183	105878619	107811701	94431624	96338416	60722796	63138270	-	-	-	-	-	-	-
	c	C2	K3	AK004878	Coasy	Pantothenate and CoA biosynthesis	coenzyme A biosynthetic process,	dephospho-kinase activity, ATP binding, pantetheine-phosphate adenylyltransferase activity	cytoplasm	Biosynthesis of coenzyme A (CoA) from pantothenic acid (vitamin B5) is an essential universal pathway in prokaryotes and eukaryotes. COASY is a bifunctional enzyme that catalyzes the 2 last steps in CoA synthesis. These activities are performed by 2 separate enzymes, phosphopantetheine adenylyltransferase (PPAT; EC 2.7.7.3) and dephospho-CoA kinase (DPCK; EC 2.7.1.24), in prokaryotes (Daugherty e…	2.47376	1.73068	1.49096	1.44411	11 D	10q32.1	17q12-q21	2580	0.097	95.4	94.6	87.5	85.5	180	98171396	105595892	86073640	94127025	36390195	45849646	242	98171396	105595892	86073640	94127025	36390195	45849646
	a	C2	K3	NM_008796	Pctp	-	lipid transport	phosphatidylcholine transmembrane transporter activity	cytosol, cytoplasm	Data support a key biological role for PCTP in the regulation of energy substrate utilization, reflecting increased hepatic triglyceride production in knockout mice [Scapa et al., 2008].	2.50648	1.6587	1.55775	1.81808	11 52.0 cM	10q26	17q21-q24	14111	0.166	93	92.1	82	83.6	181	87342438	98069770	74861925	85966681	46019090	58283081	243	87342438	98069770	74861925	85966681	46019090	58283081
	e	C2	K3	NM_007898	Doc2b	-	transport	calcium dependent phospholipid binding, transporter activity	membrane, synaptic vesicle	DOC2B is expressed ubiquitously and is suggested to be involved in Ca(2+)-dependent intracellular vesicle trafficking in various types of cells. [provided by RefSeq]	2.27704	0.0916255	1.60381	1.97249	11 B5	10q24	17p13.3	6973	0.035	98.3	95.2	94.9	90	172	73029312	77019770	59268602	63597308	36488	4482673	231	73029312	76548028	59268602	63120825	1201674	4482673
U2	l	C2	K3	NM_010232	Fmo5	Drug metabolism - cytochrome P450	oxidation reduction	monoxygenase activity	endoplasmic reticulum, membrane	NADPH-dependent flavoenzymes that catalyzes the oxidation of soft nucleophilic heteroatom centers in drugs, pesticides, and xenobiotics. Relationship between intratumoral expression of genes coding for xenobiotic-metabolizing enzymes and benefit from adjuvant tamoxifen in estrogen receptor alpha-positive postmenopausal breast carcinoma [Bieche et al., 2004].	1.91735	0.513943	0.599797	1.20838	3 F2.2	2q34	1q21.1	10254	0.11	92.3	92.1	83.9	84.2	37	88113887	123090061	179060493	219252549	93262870	154847803	45	97307416	98003257	191730475	192464565	143983899	144653633
	j	C2	K3	NM_011069	Pex11b	-	peroxisome fission	protein binding	mitochondrion, peroxisome	Fis1 plays important roles in peroxisome division and maintenance of peroxisome morphology in mammalian cells, possibly in a concerted manner with Pex11pbeta and DLP1 [Kobayashi et al., 2007].	0.764251	1.7131	1.3391	1.5831	3 F2.1	2q34	1q21.1	14159	0.061	96.1	94.6	92.3	88.9	37	88113887	123090061	179060493	219252549	93262870	154847803	46	88551101	96613838	179503960	191066835	146529244	153896409
	c	C2	K3	AF287260	Creb3l4	Melanogenesis	regulation of transcription, DNA-dependent	sequence specific DNA-binding, transcription factor activity	golgi apparatus, endoplasmic reticulum, nucleus	In LNCaP cell lines that conditionally express the processed form of AIbZIP, downstream targets of AIbZIP include genes for protein processing, transcriptional regulation, small molecule transport, signal transduction, metabolism & cell homeostasis [Ben Aicha et al., 2007]. Disruption of TISP40 caused ER stress and activation of caspase 12 but not caspase 9, leading to apoptosis of meiotic/postme…	1.61141	1.49827	1.64128	1.46645	3 F1	2q34	1q21.3	13439	0.26	87.4	91.8	71.5	79.9	37	88113887	123090061	179060493	219252549	93262870	154847803	46	88551101	96613838	179503960	191066835	146529244	153896409
U6	d	C4	K2	NM_011795	C1ql1	-	locomotory behavior	-	cytoplasm, extracellular region	modulation of immune response, inflamatory process; Conserved recoding RNA editing of vertebrate C1q-related factor C1QL1 [Sie and Mass, 2009].	0.995222	1.5402	2.8986	2.76984	11 D	10q32.1	17q21	15009	0.012	99.6	97.7	98.1	93.3	180	98171396	105595892	86073640	94127025	36390195	45849646	242	98171396	105595892	86073640	94127025	36390195	45849646
	d	C4	K2	AK011126	Lsm12	-	-	protein binding	-	Associate with RNA to form the core domain of the ribonucleoprotein particles involved in a variety of RNA processing events including pre-mRNA splicing, telomere replication, and mRNA degradation. Translation regulation is a critical means by which cells control growth, division, and apoptosis. Systematic identification and functional screens of uncharacterized proteins associated with eukaryoti…	-0.339933	2.07462	2.39873	2.93426	11 D	10q32.1	17q21.31	13933	0	100	98.6	100	96.9	180	98171396	105595892	86073640	94127025	36390195	45849646	242	98171396	105595892	86073640	94127025	36390195	45849646
	d	C4	K2	NM_007754	Cpd	-	proteolysis	metallocarboxypeptidase activity,	nucleus, membrane fraction	The metallocarboxypeptidase family of enzymes is divided into 2 subfamilies based on sequence similarities. The pancreatic carboxypeptidase-like and the regulatory B-type carboxypeptidase subfamilies. Carboxypeptidase D has been identified as a regulatory B-type carboxypeptidase. Prolactin and estrogen up-regulate carboxypeptidase-d to promote nitric oxide production and survival of mcf-7 breast …	0.128028	2.14105	2.90927	3.32222	11 46.0 cM	10q26	17q11.2	2892	0.049	97.7	94.6	91.8	88.4	172	73029312	77019770	59268602	63597308	36488	4482673	229	76576621	77019770	63149776	63597308	36488	628402
U8	l	C2	K3	AF124383	Gnas	Calcium signaling pathway, Gap junction, Taste transduction, GnRH signaling pathway, Melanogenesis, Integration of energy metabolism	protein secretion, G-protein coupled receptor protein signaling pathway (activation of adenylate cyclase activity), hormone-mediated signaling, intracellular transport,	guanyl nucleotide binding, signal transducer activity,	cell projection, cytoplasm, plasma membrane, trans-golgi network membrane, vesicle, heterotrimeric G-protein complex	A key element of the classical signal transduction pathway linking receptor-ligand interactions with the activation of adenylyl cyclase and a variety of cellular reponses: energy reserve metabolic process, morphogenesis and differentiation. Plays a central role in receptor-mediated signal transduction, coupling receptor activation with the production of cAMP regulated by genetic imprinting [Krech…	3.27908	0.801093	0.0767664	0.207025	2 E1-H3; 2 104.0 cM	3q42	20q13.3	3966 / 3494	0.040 / 0.131	-	-	-	-	35	154213324	181216656	142750090	170862470	30543378	63519190	41	154213324	181216656	142750090	170862470	30543378	63519190
	b	C2	K3	AK002408	Crls1	Glycerophospholipid metabolism	phospholipid biosynthetic process	phosphotransferase activity, for other substituted phosphate groups	mitochondrion (inner membrane)	CL has roles in in neuronal signaling, mitochondrial bioenergetics, and apoptosis [Cheng et al., 2008]. Cardiolipin deficiency releases cytochrome c from the inner mitochondrial membrane and accelerates stimuli-elicited apoptosis. Increased sensitivity to apoptotic signals and accelerated rates of apoptosis are observed in CL-deficient cells [Choi et al., 2007].	1.50463	2.52681	0.824009	1.61417	2 F3	3q36	20p13-p12.3	4433	0.019	97.7	95.5	86.7	86.7	34	131105578	150567272	116973274	137546011	1695883	23541449	40	131105578	153050431	116973274	141525818	1695883	25502070
	h	C2	K3	AK003042	Oxt	Neuroactive ligand-receptor interaction	response to stress, signal transduction, multicellular organismal water homeostasis	oxytocin receptor binding, hormone activity,	extracellular region	There are two proteins encoded by this gene, oxytocin and neurophysin I. Oxytocin is posterior pituitary hormone which is synthesized as an inactive precursor in the hypothalamus along with its carrier protein neurophysin I. Together with neurophysin, it is packaged into neurosecretory vesicles and transported axonally to the nerve endings in the neurohypophysis, where it is either stored or secr…	1.68111	1.02169	1.29979	1.5142	2 F1; 2 73.5 cM	3q36	20p13	1291	0.083	97.6	94.9	87.2	86.9	20	129375147	131058047	115158006	116927667	110419967	113552965	24	129447434	131058047	115229933	116927667	111302197	113552965
U9	b	C2	K3	NM_008748	Dusp8	MAPK signaling pathway	inactivation of MAPK activity; protein amino acid phosphorylation	MAP kinase tyrosine/serine/threonine phosphatase activity	cytoplasm, nucleus	The protein encoded by this gene is a member of the dual specificity protein phosphatase subfamily. These phosphatases inactivate their target kinases by dephosphorylating both the phosphoserine/threonine and phosphotyrosine residues. They negatively regulate members of the mitogen-activated protein (MAP) kinase superfamily (MAPK/ERK, SAPK/JNK, p38), which is associated with cellular proliferatio…	1.9067	1.57704	1.09825	1.61908	7 69.0 cM	1q41	11p15.5	11165	0.063	92.8	91.7	90.7	84.9	-	-	-	-	-	-	-	-	-	-	-	-	-	-
	i	C2	K3	U89889	Hpx	-	iron ion transport, regulation of protein metabolic process, positive regulation of immunoglobulin production, positive regulation of tyrosine phosphorylation of Stat1 protein, positive regulation of response to interferon-gamma, positive regulation of interferon-gamma-mediated signaling pathway	heme transporter activity, iron ion binding	extracellular region	Hemopexin, by controlling heme-iron availability in lymphocytes, modulates responsiveness to IFN-gamma and, hence, autoimmune responses [Fagonee et al., 2008]. Hemopexin and hemopexin domains of human proteins fulfill functions in activation of MMPs, inhibition of MMPs, dimerization, binding of substrates or ligands, cleavage of substrates, and endocytosis by LRP-1 and LRP-2 [Piccard et al., 2006…	1.07194	1.75907	2.17794	1.36052	7 F1	1q33	11p15.5-p15.4	8563	0.2	92	94.3	75.9	81.9	113	106406024	117011473	176481392	187694318	18740183	31507810	146	106901822	115007909	176983112	185512270	19378683	28257918
	h	C2	K3	NM_025605	2400001E08Rik	-	-	-	-	-	1.79458	0.904527	1.22876	1.65052	7 F1	1q32	11q13.4	13708	0.019	97.5	97.3	98.8	92.3	113	106406024	117011473	176481392	187694318	18740183	31507810	146	106901822	115007909	176983112	185512270	19378683	28257918
D1	k	C1	K1	AF280809	Dusp3	MAPK signaling pathway	protein amino acid dephosphorylation	hydrolase, phosphatase activity	nucleoplasm	Cutting edge: selective tyrosine dephosphorylation of interferon-activated nuclear STAT5 by the VHR phosphatase. [Hoyt et al., 2007]; BRCA1-IRIS activates cyclin D1 expression in breast cancer cells by downregulating the JNK phosphatase DUSP3/VHR. [Hao and ElShamy, 2007]; Loss of the VHR dual-specific phosphatase causes cell-cycle arrest and senescence. [Rahmouni et al., 2006]	-1.10098	-1.47115	-2.04675	-2.29527	11 D	10q32.1	17q21	4930	0.062	95.1	94.4	93.5	90.4	180	98171396	105595892	86073640	94127025	36390195	45849646	242	98171396	105595892	86073640	94127025	36390195	45849646
	a	C1	K1	BC008158	Ifi35	-	immune response	protein binding	nucleus	Intracellular redistribution of interferon-inducible proteins Nmi and IFP 35 in apoptotic cells. [Chen and Naumovski, 2002];	-1.50722	-1.64065	-1.86935	-1.71602	11 D	10q32.1	17q21	13639	0.254	87.4	89.9	72.3	78.5	180	98171396	105595892	86073640	94127025	36390195	45849646	242	98171396	105595892	86073640	94127025	36390195	45849646
	o	C1	K1	NM_007970	Ezh1	-	regulation of transcription, anatomical structure morphogenesis	DNA and chromatin binding,	nucleus	Mantains repressive chromosome through several mechanisms [Margueron et al., 2008];	-1.44127	-1.31055	-1.4553	-1.8774	11 62.0 cM	10q32.1	17q21.1-q21.3	5163	0.016	98.8	95.5	98	90.9	180	98171396	105595892	86073640	94127025	36390195	45849646	242	98171396	105595892	86073640	94127025	36390195	45849646
	d	C1	K1	AJ132391	Aldoc	-	metabolic process: glycolysis	fructose-bisphosphate aldolase activity	mitochondrion	The selective regulation of AldC/zebrin may contribute to a shift in nutrient metabolism during pregnancy and lactation to facilitate epithelial growth and biosynthesis of milk constituents. [Matsuda et al., 2003]; brain-specific aldolase C gene could constitute a new target for the transcription factor Pax-6, which is implicated increasingly in neurogenesis. [Skala-Rubinson et al., 2002]	-0.820973	-1.61764	-1.82607	-1.57554	11 44.98 cM	10	17cen-q12	4990	0.021	98.1	95.3	97.8	90.5	177	77519846	78393247	66507246	67450739	27569140	28698922	238	77519846	78393247	66507246	67450739	27569140	28698922
	l	C1	K1	NM_008878	Serpinf2	Complement and coagulation cascades	acute-phase response	serine type endopeptidase inhibitor activity	cytoplasm, extracellular region, nucleus	Results show that alpha2-antiplasmin is a critical regulator for vascular remodeling by inhibiting p53/p21 pathway. [Hou et al., 2008]	-1.73711	-0.396032	0.0989354	-0.15254	11 B5	10q24	17p13	4918	0.241	86.8	91	74.5	81.2	172	73029312	77019770	59268602	63597308	36488	4482673	231	73029312	76548028	59268602	63120825	1201674	4482673
	e	C1	K1	BC008166	Tax1bp3	-	Rho protein signal transduction	protein binding	nucleus, cytoplasm	TIP-1 may represent a novel regulatory element in the Wnt/beta-catenin signaling pathway. [Kanamori et al., 2003];	-1.56448	-1.39897	-1.74462	-2.20818	11 B4	10q24	17p13	8717	0.009	-	-	99.2	90.1	173	71052229	73019271	57233946	59249137	4525493	6667489	232	71052229	73019271	57233946	59249137	4525493	6667489
	k	C1	K1	NM_010353	Gsg2	-	cell cycle, chromatin modification, protein amino acid phosphorylation, kinase cascade	kinase activity, transferase activity, ATP binding, nucleotide binding	nucleus	This work reveals a new kinase involved in composing the histone code and adds haspin to the select group of kinases that integrate regulation of chromosome and spindle function during mitosis and meiosis. [Dai et al., 2005]; Haspin is required to maintain centromeric cohesion during mitosis. [Dai et la., 2006]	-1.34004	-1.22576	-1.70382	-1.64203	11 47.0 cM	10	17p13	1352	0.35	-	-	65.6	75.8	173	71052229	73019271	57233946	59249137	4525493	6667489	232	71052229	73019271	57233946	59249137	4525493	6667489
	h	C1	K1	AK010289	Rpain	-	DNA recombination, repair and replication; protein import into nucleus	protein complex binding	PML body, cytoplasm, nucleus	hRIPbeta localises to the PML nuclear body and transports replication protein A (PML) into the PML nuclear body and releases RPA upon UV irradiation. [Park et al., 2005];	-1.6215	-0.869143	-1.14827	-1.55037	11 B4	10q24	17p13.2	584	0.254	91	92.4	73.1	78.2	174	62878643	70954725	48409472	57146704	6793483	16415754	233	63477436	70954725	48996739	57146704	6793483	15501847
	k	C1	K1	NM_029231	Pelp1	-	transcription	-	nucleus, cytoplasm	PELP1 recruits HDAC2 and masks histones using two separate domains. [Choi et al., 2004]; Functional interactions between the estrogen receptor coactivator PELP1/MNAR and retinoblastoma protein. [Balasenthil and Vadlamudi, 2003]	-0.986365	-1.08994	-1.75607	-2.22288	11 B3	10q24	17p13.2	8235	0.095	95.1	94.3	87.8	85	174	62878643	70954725	48409472	57146704	6793483	16415754	233	63477436	70954725	48996739	57146704	6793483	15501847
	j	C1	K1	AB010319	Zfp287	-	regulation of transcription, regulation of cytokine biosynthetic process	nucleic acid binding, transcription factor activity	intracellular, nucleus	Identification and characterization of SKAT-2, a novel Th2-specific zinc finger gene. [Blanchard et al., 2000];	-0.909526	-1.83332	-1.43688	-1.77685	11 B2	10q23	17p11.2	8778	0.162	89.9	90.1	83.9	83.4	175	60267354	62863684	45962124	48391922	16867619	20110882	-	-	-	-	-	-	-
D3	o	C1	K1	AK015161	Morn1	-	-	-	-	A MORN-repeat protein is a dynamic component of the Toxoplasma gondii cell division apparatus [Gubbels et al., 2006]	-1.01399	-1.16558	-1.02193	-1.7871	4 E2	5q36	1p36.33-p36.32	7480	0.193	90.1	92.1	70.2	77	-	-	-	-	-	-	-	-	-	-	-	-	-	-
	d	C1	K1	NM_010329	Pdpn	-	cell adhesion, cell morphogenesis, tube morphogenesis	regulation of cell shape	plasma membrane (lamelipodium, ruffles)	podoplanin induces an alternative pathway of tumor cell invasion in the absence of epithelial-mesenchymal transition [Wicki et al., 2006] Podoplanin is a novel fos target gene in skin carcinogenesis [Durchdewald et al., 2008] podoplanin may have a role in axillary lymph node metastases of breast neoplasms [Braun et al., 2008]	-0.977588	-1.54425	-1.69577	-1.7168	4 E1	5q36	1p36.21	15451	0.746	81.3	86.5	48.1	64	50	132039996	152701590	152737306	172891838	1008947	26019684	60	132039996	152701590	152737306	172891838	1008947	26019684
	k	C1	K1	NM_016748	Ctps	Pyrimidine metabolism	nucleobase, nucleoside, nucleotide and nucleic acid metabolic process; glutamine metabolic process	CTP synthase activity, protein binding	cellular component, cytosol	The enzyme is important in the biosynthesis of phospholipids and nucleic acids, and plays a key role in cell growth, development, and tumorigenesis. The region to which the CTPS gene has been mapped is the location of breakpoints involved in several tumor types [provided by RefSeq]	-1.29112	-1.36691	-1.73058	-1.89807	4 57.0 cM	5q36	1p34.1	2333	0.022	99	95.7	97.1	90	52	101290473	130234350	124266877	151153913	28515209	58369437	62	101290473	130234350	124266877	151153913	28515209	58369437
	k	C1	K1	NM_020000	Med8	-	regulation of transcription, DNA-dependent; ubiquitin-dependent protein catabolic process	-	mediator complex, nucleus	mammalian mediator subunit mMED8 is an elongin BC-interacting protein that can assemble with Cul2 and Rbx1 reconstitute a ubiquitin ligase (Ubc5; E2 ubiquitin-conjugating enzyme Ubc5) [Brower et al., 2002]	-1.01388	-0.933728	-1.7105	-1.95441	4 D1	5q36	1p34.2	178	0.019	98.9	95.8	96.6	90.4	52	101290473	130234350	124266877	151153913	28515209	58369437	62	101290473	130234350	124266877	151153913	28515209	58369437
D5	o	C1	K1	AK003432	Xpot	-	transport	tRNA binding	nucleus, cytoplasm	This gene encodes a protein belonging to the RAN-GTPase exportin family that mediates export of tRNA from the nucleus to the cytoplasm. Translocation of tRNA to the cytoplasm occurs once exportin has bound both tRNA and GTP-bound RAN. [provided by RefSeq] Exportin-t preferentially binds and exports those tRNAs that are rapidly consumed by the protein synthesis machinery [Li and Sprinzl, 2006]	-0.999606	-1.25876	-1.45632	-1.54498	10 D3	7q22	12q14.2	4670	0.023	98.9	93.7	95.5	87	160	86176440	127958839	23368893	67924008	56991450	104255927	213	86176440	127958839	23368893	67924008	56991450	104255927
	o	C1	K1	NM_025706	Tbc1d15	-	regulation of Rab GTPase activity,	Rab GTPase activator activity	intracellular	TBC1D15 may be involved in Rab7-mediated late endosomal trafficking [Zhang et al., 2005]	-1.20613	-1.12942	-1.28948	-1.74031	10 D2	7q22	12q21.1	10870	0.067	96.6	94.1	91.2	87.4	160	86176440	127958839	23368893	67924008	56991450	104255927	213	86176440	127958839	23368893	67924008	56991450	104255927
	k	C1	K1	NM_010401	Hal	Histidine metabolism	histidine catabolic process,	histidine ammonia-lyase activity	cytosol, cytoplasm	Histidase expression in human epidermal keratinocytes: Regulation by differentiation status and all-trans retinoic acid [Eckhart et al., 2008] Histidase (Hal), the amino acid-degrading enzyme of histidine, is regulated by the protein content of the diet and by hormones such as glucocorticoids and glucagon. [Aleman et al., 2005]	-1.12066	-1.21925	-1.92418	-2.06384	10 51.0 cM	7q13	12q22-q24.1	10788	0.03	98.8	94.6	93.8	87.4	160	86176440	127958839	23368893	67924008	56991450	104255927	213	86176440	127958839	23368893	67924008	56991450	104255927
	k	C1	K1	AK006438	Eid3	-	regulation of transcription, DNA-dependent	binding to class I histone deacetylases (HDACs)	nucleus, cytoplasm	EID3 acts as an inhibitor of CBP/p300-dependent transcription in a tissue-specific manner [Bavner et al., 2005].	-1.33718	-1.22378	-1.94295	-1.98626	10 C1	7q13	12q23-q24.1	4231	0.227	88.5	90.4	72.7	77.4	161	82232547	85460888	20090998	23319788	104315934	108109650	214	82232547	85460888	20090998	23319788	104315934	108109650
D7	o	C1	K4	BC011321	Ddx27	-	-	ATP-dependent helicase activity	nucleus	DEAD box proteins, characterized by the conserved motif Asp-Glu-Ala-Asp (DEAD), are putative RNA helicases. They are implicated in a number of cellular processes involving alteration of RNA secondary structure such as translation initiation, nuclear and mitochondrial splicing, and ribosome and spliceosome assembly. Based on their distribution patterns, some members of this family are believed to …	-0.808142	-0.800319	-1.13122	-1.66805	2 H3	3q42	20q13.13	6402	0.093	96.7	95.1	93	88.3	35	154213324	181216656	142750090	170862470	30543378	63519190	41	154213324	181216656	142750090	170862470	30543378	63519190
	o	C1	K4	AK008108	Sulf2	-	heparan sulfate proteoglycan metabolic process;	arylsulfatase activity	Golgi apparatus, endoplasmic reticulum, extracellular space	Sulf1 and Sulf2 are two heparan sulfate 6-O-endosulfatases that regulate the activity of multiple growth factors, such as fibroblast growth factor and Wnt, and are essential for mammalian development and survival [Lamanna et al., 2008] HSulf-1 and HSulf-2 have roles in inhibiting myeloma tumor growth [Dai et al., 2005] Heparan sulfate proteoglycans (HSPGs) act as coreceptors for numerous heparin-…	-0.94267	-0.299983	-1.09914	-1.62094	2 H3	3q42	20q12-q13.2	405	0.039	98.1	94.1	94.5	88	35	154213324	181216656	142750090	170862470	30543378	63519190	41	154213324	181216656	142750090	170862470	30543378	63519190
	o	C1	K4	NM_008792	Pcsk2	-	proteolysis: protein autoprocessing (insulin, enkephalin, islet amyloid polypeptide)	serine-type endopeptidase activity	cytoplasmic vesicle, membrane, extracellular space	alpha-melanocyte-stimulating hormone was not detected in brain and pituitary glands of prohormone convertase 2 - deficient mice [Miller et al., 2003] The protein encoded by this gene belongs to the subtilisin-like proprotein convertase family. The members of this family are proprotein convertases that process latent precursor proteins into their biologically active products. This encoded protein …	-0.716992	-0.18935	-0.310076	-1.72257	2 81.4 cM	3q42	20p11.2	4018	0.02	99.4	95.3	96.9	89.6	34	131105578	150567272	116973274	137546011	1695883	23541449	40	131105578	153050431	116973274	141525818	1695883	25502070
	o	C1	K4	AK013491	Macrod2	-	nucleosome assembly	ADP-ribosylation of proteins	nucleus	DNA repair, transcription, chromatin biology	-0.476549	-0.354431	-0.9049	-1.88412	2 F3	3q41	20p12.1	12893	0.315	-	-	-	-	34	131105578	150567272	116973274	137546011	1695883	23541449	40	131105578	153050431	116973274	141525818	1695883	25502070
D2	k	C1	K4	NM_013926	Cbx8	-	regulation of transcription, DNA-dependent; chromatin modification (histone ubiquitination): assembly/disassembly	ubiquitin-protein ligase activity, chromatin binding, protein binding	PcG protein complex, nucleus, chromatin, ubiquitin-ligase complex	CBX8 is an essential component of one of the polycomb repressive complexes, which directly regulate the expression of numerous target genes, including the INK4A-ARF locus, involved in cell-fate decisions [Dietrich et al., 2007].	0.163129	-0.966287	-1.78643	-1.59223	11 E2	10q32.3	17q25.3	12199	0.048	97	95	93.9	87.1	185	110333332	122372806	98729582	110727299	66761195	81285472	247	110534254	122372806	99141339	110727299	67015399	81285472
	o	C1	K4	X81718	Tmem97	-	regulation of cell growth	-	membrane	Coordinate up-regulation of TMEM97 and cholesterol biosynthesis genes in normal ovarian surface epithelial cells treated with progesterone: implications for pathogenesis of ovarian cancer. [Wilcox et al., 2007]	0.174734	-0.151823	-1.02923	-1.73236	11 45.19 cM	10q25	17q11.2	8667	0.143	94.3	93.9	82.4	82.4	177	77519846	78393247	66507246	67450739	27569140	28698922	238	77519846	78393247	66507246	67450739	27569140	28698922
	o	C1	K4	X81633	Spag5	Phosphoinositide-mediated signaling	cell cycle, cell division, mitosis, spindle organization,	-	spindle microtubule, cytoplasm, condesed chromosome kinetochore	cloning and genomic structure of mastrin; mastrin protein was demonstrated to localize to mitotic spindles during mitosis [Chang et al., 2003]. This gene encodes a protein associated with the mitotic spindle apparatus. The encoded protein may be involved in the functional and dynamic regulation of mitotic spindles. [provided by RefSeq] Reduced mitotic activity and increased apoptosis of fetal ser…	-0.452402	-0.667249	-0.968	-1.64038	11 44.95 cM	10q25	17q11.2	498	0.301	86.4	90.7	68	78	177	77519846	78393247	66507246	67450739	27569140	28698922	238	77519846	78393247	66507246	67450739	27569140	28698922
D8	e	C5	K1	AK007756	1810043H04Rik	-	-	-	-	-	-1.60622	-1.39455	-2.02246	-2.38281	11 E2	10q32.3	17q25.3	3720	0.069	98.6	95.5	87.7	85.4	185	110333332	122372806	98729582	110727299	66761195	81285472	247	110534254	122372806	99141339	110727299	67015399	81285472
	e	C5	K1	NM_016780	Itgb3	Focal adhesion, ECM-receptor interaction, Hematopoietic cell lineage, Regulation of actin cytoskeleton	cell adhesion; regulation of cell migration; integrin-mediated signaling pathway	integring binding, receptor activity, cell-surface mediated signalling	integrin complex, plasma membrane	beta3 integrin alters TGF-beta signaling in mammary epithelial cells via Src-mediated TbetaR-II tyrosine phosphorylation, which significantly enhanced the ability of TGF-beta to induce epithelial to mesenchymal transition and invasion. [Galliher and Schiemann, 2006] The ITGB3 protein product is the integrin beta chain beta 3. Integrins are integral cell-surface proteins composed of an alpha chain…	-2.18364	-1.4762	-2.44826	-2.92648	11 68.0 cM	10	17q21.32	7243	0.073	-	-	90.7	86.5	180	98171396	105595892	86073640	94127025	36390195	45849646	242	98171396	105595892	86073640	94127025	36390195	45849646
	a	C5	K1	D30730	Nf1	MAPK signaling pathway	cell cycle, actin cytoskeleton organization, cell communication, morphogenesis , apoptosis; negative regulator of the Ras protein signal transduction	Ras GTPase activator activity	cytoplasm, nucleus, intracellular	Epidermal growth factor receptor signaling pathways are associated with tumorigenesis in the Nf1:p53 mouse tumor model. [Li et al., 2002] The dynamic proteasomal regulation of neurofibromin represents an important mechanism of controlling both the amplitude and duration of Ras-mediated signaling. [Cichowski et al., 2003] These novel findings provide insight into possible signaling mechanisms of N…	-2.14785	-1.68993	-2.26484	-1.97121	11 46.06 cM	10q25	17q11.2	9741	0.014	98.7	95.6	98.5	91.6	176	78444844	80067187	63711841	65479650	25434935	27497674	237	78444844	80067187	63711841	65479650	25434935	27497674
D9	j	C1	K1	U95030	Alcam	Cell adhesion molecules (CAMs)	cell adhesion, axon guidance, signal transduction	protein binding, receptor binding	plasma membrane	ALCAM coordinates tissue growth and cell migration in a process involvnig L1CAM [van Kilsdonk et al., 2008] activated leukocyte cell adhesion molecule (ALCAM/CD166) may have a role in breast cancer [Ihnen et al., 2008]	-1.36437	-1.5691	-0.911071	-1.92881	16 B5	11q21	3q13.1	9067	0.049	97.8	94.9	93	89.3	233	32971244	63162247	38216773	69475340	95064492	126594916	308	32971244	61979366	39591957	69475340	96390755	126594916
	k	C1	K1	NM_007414	Adprh	-	protein modification: protein amino acid de-ADP-ribosylation	ADP-ribosylarginine hydrolase activity	-	The enzyme encoded by this gene catalyzes removal of mono-ADP-ribose from arginine residues of proteins in the ADP-ribosylation cycle. Unlike the rat and mouse enzymes, which require DTT for maximal activity, the human enzyme is DTT-independent. [provided by RefSeq] Silencing of the putative maternally imprinted tumor suppressor gene ARHI serves as a key early event in follicular thyroid carcinog…	-1.44188	-1.14702	-1.78734	-1.74269	16 B4	11q21	3q13.31-q13.33	14919	0.144	93.4	91.5	82.5	82.3	233	32971244	63162247	38216773	69475340	95064492	126594916	308	32971244	61979366	39591957	69475340	96390755	126594916
	k	C1	K1	AK018314	Klhl24	-	-	protein binding	cytoplasm, cell projection	regulation of the cell structure, stress response, and cell proliferation; Differential gene expression involved in oxidative stress response caused by triethylene glycol dimethacrylate. [Schweikl et al., 2008]	-1.42847	-0.920186	-1.66225	-2.0099	16 B1	11q23	3q27.1	14092	0.003	100	95.5	99.3	91.9	234	19435437	31064744	71368868	83530841	184255517	196679051	309	19707371	31064744	71368868	83309936	184619216	196679051
D11	k	C1	K1	AK015673	Fam154a	-	-	-	-	-	-1.31566	-1.46537	-1.67907	-1.48854	4 C3	5q32	9p22.1	2289	0.258	86.1	89.9	66.2	76.4	58	71561684	92865901	92081228	115224643	6733134	27279792	68	71561684	92865901	92081228	115224643	6733134	27279792
	o	C1	K1	AF112439	Fancg	-	cell cycle checkpoint, mitochondrion organization; DNA repair	damaged DNA binding, protein binding	mitochondrion, cytoplasm, nucleus	FANCG is required for efficient homologous recombination-mediated repair of at least some types of DNA double-strand breaks [Yamamoto et al., 2003] Ataxia telangiectasia mutated and Fanconi anemia genes function in parallel and compensatory roles to maintain genomic integrity and cell viability. [Kennedy et al., 2007] FA proteins function at the level of chromatin during S phase to regulate and m…	-1.38253	-1.30341	-1.20195	-1.92074	4 B1	5q22	9p13	12365	0.242	88.9	91.8	73.6	79.4	59	34794594	44713053	51627466	62374348	27328761	38461949	69	34794594	44713053	51627466	62374348	27328761	38461949
	o	C1	K1	NM_026275	Ube2r2	Ubiquitin mediated proteolysis	ubiquitin-dependent protein catabolic process, post-translational protein modification	ubiquitous and pleiotropic Ser/Thr protein kinase; ubiquitin-protein ligase activity	-	Protein kinase CK2 is a ubiquitous and pleiotropic Ser/Thr protein kinase involved in cell growth and transformation. This gene encodes a protein similar to the E2 ubiquitin conjugating enzyme UBC3/CDC34. Studies suggest that CK2-dependent phosphorylation of this ubiquitin-conjugating enzyme functions by regulating beta-TrCP substrate recognition and induces its interaction with beta-TrCP, enhanc…	-1.15072	-1.01679	-1.36287	-2.12578	4 B1	5q22	9p13.3	2671	0	93.7	91.5	100	94.4	59	34794594	44713053	51627466	62374348	27328761	38461949	69	34794594	44713053	51627466	62374348	27328761	38461949
D12	k	C1	K4	AK003996	Klk5	-	Proteolysis: Trypsin-like serine protease	serine-type endopeptidase activity	extracellular space	The cloning and characteriazation of recombinant Klk5 is reported. [Rajapakse et al., 2006] Kallikreins are a subgroup of serine proteases having diverse physiological functions. Growing evidence suggests that many kallikreins are implicated in carcinogenesis and some have potential as novel cancer and other disease biomarkers. This gene is one of the fifteen kallikrein subfamily members located …	-0.866044	-0.947368	-1.56725	-2.23676	7 24.0 cM	1q22	19q13.3-q13.4	6237	0.196	88.1	89.9	70.4	75.6	-	-	-	-	-	-	-	-	-	-	-	-	-	-
	k	C1	K4	NM_007948	Ercc1	Nucleotide excision repair	DNA repair: (nucleotide excision), DNA recombination, cell proliferation, chromosome organization, negative regulation of apoptosis, mitotic recombination, cell development, response to DNA damage	endonuclease activity; damaged DNA binding	nuclear chromosome telomeric region, nucleoplasm, nucleus, nucleotide-excision repair complex	Data reveal an unanticipated involvement of the ERCC1/XPF NER endonuclease in the regulation of telomere integrity. [Zhu et al., 2003] DNA repair proteins BRCA1 and ERCC1 have roles in inhibiting progression of ovarian cancer [Weberpals et al., 2009]	-0.388081	-1.06299	-1.93805	-1.7242	7 4.0 cM	1q21	19q13.2-q13.3	7055	0.131	90.9	93.1	85.9	82.4	115	10520792	28142816	76274338	90828862	34780779	53013826	151	18736910	28142816	82319295	90828862	34780779	45981226
	k	C1	K4	AK020752	Tmem86b	-	-	-	membrane	-	-0.93298	-0.714681	-1.82629	-1.73101	7 A1	1q12	19q13.42	1927	0.325	88.9	93.5	66.7	75.3	-	-	-	-	-	-	-	155	3804708	5644045	66115566	68206728	60232459	61630151
D14	k	C1	K4	NM_008975	Ptp4a3	-	protein amino acid dephosphorylation	prenylated protein tyrosine phosphatase activity	early endosome, plasma membrane	Results identify Prl-3 (phosphatase of regenerating liver-3) as a p53-inducible gene, and demonstrate that Prl-3 is an important cell-cycle regulator [Basak et al., 2008]. Results suggest that PRL-3 may serve as an unfavorable prognostic marker in breast cancer, especially for patients with node-negative diseases [Wang et al., 2006]. Overexpression of this gene in mammalian cells was reported to …	-0.62386	-0.784517	-1.55045	-1.98142	15 E1	7q34	8q24.3	14517	0.024	100	97.1	96.5	88.4	229	32738673	77151532	68218650	114999470	97082832	145720450	302	32738673	77015103	68218650	114866404	97082832	145445749
	o	C1	K4	NM_009177	St3gal1	O-Glycan biosynthesis, Keratan sulfate biosynthesis, Glycosphingolipid biosynthesis - globoseries, Glycosphingolipid biosynthesis - ganglioseries, Glycan structures - biosynthesis 1, Glycan structures - biosynthesis 2	protein amino acid glycosylation	beta-galactoside alpha-2,3-sialyltransferase activity	Golgi apparatus	St3gal-1 functions to protect CD8 T cells from apoptosis [Priatel et al., 200]. The protein encoded by this gene is a type II membrane protein that catalyzes the transfer of sialic acid from CMP-sialic acid to galactose-containing substrates. The encoded protein is normally found in the Golgi but can be proteolytically processed to a soluble form. ST3Gal-I inactivation or enzymatic removal of its…	-1.0846	-0.678597	-1.05087	-2.24938	15 D2	7q33	8q24.22	14863	0.151	96.7	95.6	82.2	81.9	229	32738673	77151532	68218650	114999470	97082832	145720450	302	32738673	77015103	68218650	114866404	97082832	145445749
	o	C1	K4	AK014624	Depdc6	-	intracellular signaling cascade	protein binding	intracellular	-	-0.985367	-0.759558	-1.35101	-1.60621	15 6.7 cM	7q31	8q24.12	12812	0.034	-	-	95.6	89.8	229	32738673	77151532	68218650	114999470	97082832	145720450	302	32738673	77015103	68218650	114866404	97082832	145445749
D15	o	C1	K4	NM_023557	Slc44a4	-	transport	transporter activity	membrane	Choline is an organic cation that plays a critical role in the structure and function of biological membranes in all cells as an essential component of membrane phospholipid, phosphatidylcholine and sphingomyelin. PCho is both a precursor and a breakdown product of phosphatidylcholine, the most abundant phospholipid in biological membranes.	-0.610153	-0.632509	-1.12768	-2.30725	17 B2	20p12	6p21.3	9538	0.149	92.4	92.3	82.6	81.2	245	32504226	36442407	668523	5131591	29318081	33298628	328	32504226	34609513	2932295	5131591	30574738	33298628
	o	C1	K4	NM_019441	Ppt2	-	protein modification process	palmitoyl-CoA hydrolase activity	lysosome	Fatty acid elongation in mitochondria. The encoded glycosylated lysosomal protein has palmitoyl-CoA hydrolase activity in vitro, but does not hydrolyze palmitate from cysteine residues in proteins.	-0.771157	-0.603457	-1.20332	-1.57012	17 18.9 cM	20p12	6p21.3	5590	0.052	97.7	93.6	93.7	89.1	245	32504226	36442407	668523	5131591	29318081	33298628	328	32504226	34609513	2932295	5131591	30574738	33298628
	o	C1	K4	NM_019420	B3galt4	Glycosphingolipid biosynthesis - ganglioseries, Glycan structures - biosynthesis 2	protein amino acid glycosylation	UDP-galactose:beta-N-acetylglucosamine beta-1,3-galactosyltransferase activity	Golgi appartatus	This family encodes type II membrane-bound glycoproteins with diverse enzymatic functions using different donor substrates (UDP-galactose and UDP-N-acetylglucosamine) and different acceptor sugars (N-acetylglucosamine, galactose, N-acetylgalactosamine). ETS-1 transcription factor activates the expression of mouse UDP-Gal:GA2/GM2/GD2/GT2 galactosyltransferase gene [Raimondi et al., 2004].	-0.922056	-0.924027	-1.21529	-1.6213	17 B1	20p12	6p21.3	9401	0.137	92.7	92.4	81.7	80	245	32504226	36442407	668523	5131591	29318081	33298628	328	32504226	34609513	2932295	5131591	30574738	33298628
D16	o	C1	K4	AK005338	Snx15	-	intracellular protein transport (trafficking); cell communication	protein transporter activity, phosphoinositide binding	cytosol, membrane	Overexpression of this gene results in a decrease in the processing of insulin and hepatocyte growth factor receptors to their mature subunits. This decrease is caused by the mislocalization of furin, the endoprotease responsible for cleavage of insulin and hepatocyte growth factor receptors. This protein is involved in endosomal trafficking from the plasma membrane to recycling endosomes or the …	-0.690835	-0.856634	-1.34111	-1.64727	19 A	1q43	11q12	14285	0.071	95.8	93.3	88.1	84.7	276	3000979	7430437	205946546	210505509	63509335	68957204	375	3992315	7430437	205946546	209633192	64449185	68957204
	k	C1	K4	BC014818	Ndufv1	Oxidative phosphorylation	mitochondrial electron transport, NADH to ubiquinone	NADH dehydrogenase (ubiquinone) activity	mitochondrion, membrane; mitochondrial respiratory chain complex I	A genetic association analysis of cognitive ability and cognitive ageing using 325 markers for 109 genes associated with oxidative stress or cognition [Harris et al., 2007].	-0.857675	-0.761123	-1.60128	-2.1391	19 A	1q42	11q13	8474	0.031	98.1	95.3	95.9	89.7	276	3000979	7430437	205946546	210505509	63509335	68957204	375	3992315	7430437	205946546	209633192	64449185	68957204
	o	C1	K4	BF164689	Tcirg1	Oxidative phosphorylation	positive regulation of cell proliferation; ATP synthesis coupled proton transport	hydrogen ion transmembrane transporter activity	plasma membrane, proton-transporting two-sector ATPase complex, proton-transporting domain	V-ATPase is a multisubunit enzyme that mediates acidification of eukaryotic intracellular organelles. V-ATPase dependent organelle acidification is necessary for such intracellular processes as protein sorting, zymogen activation, and receptor-mediated endocytosis.	0.273467	-0.0805156	-1.22996	-1.99084	19 6.0 cM	1q42	11q13.2	7528	0.112	94.8	93.9	84.6	83.2	276	3000979	7430437	205946546	210505509	63509335	68957204	-	-	-	-	-	-	-
U - Up-regulated, D - Down-regulated, BP - Biological Process, MF - Molecular Function, CC - Cellular compartment, SP - Signaling Pathway, RIFs - Reference into function, AA - Aminoacid, NT - Nucleotide.
